# Supplementary material for: The Mouse Solitary Odorant Receptor Gene Promoters as Models for the Study of Odorant Receptor Gene Choice
Source: PubMed Central journal article supplement (PMC4721658; doi:10.1371/journal.pone.0144698), 2016-01-21
Supplement: pone.0144698.s003.pdf [file pone.0144698.s003.pdf]

## Sequences of 5' RACE clones in FASTA format

```
>1 WOM_Olfr6
GTGCAGTGACCCAGTGACTCATACAGTAAGAATGATGACCAGATTTTCCAAAAGCACAA
ACACATAAGTTATGAAGAAGATGGAGAAAAGCAGAATTTGCAGCCATGGAGCAGTAGGG
AAGCCCATGAGG
>2 WOM_Olfr6
TAGGCTTGTGCAGTGACCCAGTGACCCATACAGTAAGAATGATGACCAGATTTTCCAAA
AGCACAAACACATAAGTTATGAAGAAGATGGAGAAAAGCAGAATTTGCAGCCATGGAGC
AGTAGGGAAGCCCATG
>3 WOM_Olfr6
TAGGCTTGTGCAGTGACCCAGTGACCCATACAGTAAGAATGATGACCAGATTTTCCAAA
AGCACAAACACATAAGTTATGAAGAAGATGGAGAAAAGCAGAATTTGCAGCCATGGAGC
AGTAGGGAAGCCCATG
>4 WOM_Olfr6
TAGGCTTGTGCAGTGACCCAGTGACCCATACAGTAAGAATGATGACCAGATTTTCCAAA
AGCACAAACACATAAGTTATGAAGAAGATGGAGAAAAGCAGAATTTGCAGCCATGGAGC
AGTAGGGAAGCCCATG
>5 WOM_Olfr6
TAGGCTTGTGCAGTGACCCAGTGACCCATACAGTAAGAATGATGACCAGATTTTCCAAA
AGCACAAACACATAAGTTATGAAGAAGATGGAGAAAAGCAGAATTTGCA
>6 WOM_Olfr6
TAGGCTTGTGCAGTGACCCAGTGACCCATACAGTAAGAATGATGACCAGATTTTCCAAA
AGCACAAACACATAAGTTATGAAGAAGGTGGAGAAAAGCAGAATTTGCAGCCATGGAGC
AGTAGGGAAGCCCATGAGGATGAACTCACTGATGTTGGTGATGTTTTCCATCCACAAAG
TTGGATCACCAAATGACAAAAGATTGGATGCTAATATC
>7 WOM_Olfr6
TAGGCTTGTGCAGTGACCCAGTGACCCATACAGTAAGAATGATGACCAGATTTTCCAAA
AGCACAAACACATAAGTTATGAAGAAGATGGAGAAAAGCAGAATTTGCAGCCATGGAGC
AGTAGGGAAGCCCATG
>8 WOM_Olfr6
TAGGCTTGTGCAGTGACCCAGTGACCCATNCAGTAAGAATGATGACCAGATTTTCCAAA
AGCACAAACACATAAGTTATGAAGAAGATGGAGAAAAGCAGAATTTGCAGCCATGGAGC
AGTAGGGAAGCCCATGAGGATGAACTCACTGATGTTGGTGATGTTTTCCATCCACAAAG
TTGGATCACCAAATGACAAAAGATTGGATGCTAATATCAGAAAATTTAAGAATAAGATC
CATGAGAGTACCATGGAACATTAGGCTGAAGATTAGTTTTATTATTATAAAAAATCCTTAC
TCTTGATTCCCTCATTTTACCATGAGACTGATGTGGGAAACAAGAGAGGCCATAAGATGAG
TCCAGAAAAATAGAGACCTCTTACTTTATCCTGCTTTGTATTTAGCTCTGTAGTTGGAA
GCAGTTGAGAATCACCAAACATTGCAGTTACTTAGCAAAGGGACTAGAAAAAGAAAGAG
CCATCTTGTTGAACATTCACCAAATTTTTATATCTTGCATTTGTGATCTTCATTCTTCA
TGGCAGCTTTTTGTTACTCCAAGATCATGTAATCTGATAAGTCAGAAAAAGAAAAATAA
ACAACTGATGTAGCTGACCCAGTAGATGCTCCAAGTAAGAAGTAGGTTTTCAGACTGAT
GGGCAGGTGTCTTTGAGAACAAAACTTTGCCCATATGAATCTTTGTCTTTGCATTAT
TGGGCTTGCCTGATACTCCTAGAGGCCAGGATAGAAGAGGTTTTCCCTATTGTTGTGCTT
TTTCTCCATCACTGTTTCAATGCCTTTCTCAGTCTTCTCTCACTCTTTCTCTTACTTTTG
CTCCTGACCTATTTCTCTTCCC
>9 WOM_Olfr6
```

TAGGCTTGTGCAGTGACCCAGTGACCCATACAGTAAGAATGATGACCAGATTTTCCAAA  
AGCACAAACACATAAGTTATGAAGAAGATGGAGAAAAGCAGAATTTGCAGCCATGGAGC  
AGTAGGGAAGCCCATGAGGATGAACTCACTGATGTTGGTGATGTTTTCCATCCACAAAG  
TTGGATCACCAAATGACAAAAGATTGGATGCTA

>10 WOM\_0lfr6

TAGGCTTGTGCAGTGACCCAGTGACCCATACAGTAAGAATGATGACCAGATTTTCCAAA  
AGCACAAACACATAAGTTATGAAGAAGATGGAGAAAAGCAGAATTTGCAGCCATGGAGC  
AGTAGGGAAGCCCATG

>11 WOM\_0lfr6

TAGGCTTGTGCAGTGACCCAGTGACCCATACAGTAAGAATGATGACCAGATTTTCCAAA  
AGCACAAACACATAA

>12 WOM\_0lfr6

TAGGCTTGTGCAGTGACCCAGTGACCCATACAGTAAGAATGATGACCAGATTTTCCAAA  
AGCACAAACACATAAGTTATGAAGAAGATGGAGAAAAGCAGAATTTGCAGCCATGGAGC  
AGTAGGGAAGCCCATG

>13 WOM\_0lfr6

TAGGCTTGTGCAGTGACCCAGTGACCCATACAGTAAGAATGATGACCAGATTTTCCAAA  
AGCACAAACACATAAGTTATGAAGAAGATGGAGAAAAGCAGAATTTGCAGCCATGGAGC  
AGTAGGGAAG

>14 WOM\_0lfr6

TAGGCTTGTGCAGTGACCCAGTGACCCATACAGTAAGAATGATGACCAGATTTTCCAAA  
AGCACAAACACATAAGTTATGAAGA

>15 WOM\_0lfr6

TAGGCTTGTGCAGTGACCCAGTGACCCATACAGTAAGAATGATGACCAGATTTTCCAAA  
AGCACAAACACATAAGTTATGAAGAAGATGGAGAAAAGCAGAATTTGCAGCCATGGAGC  
AGTAGGGAAGCCCATGAG

>16 WOM\_0lfr6

TAGGCTTGTGCAGTGACCCAGTGACCCATACAGTAAGAATGATGACCAGATTTTCCAAA  
AGCACAAACACATAAGTTATGAAGAAGATGGAGAAAAGCAGAATTTGCAGCCATGGAGC  
AGTAGGGAAGCCCATG

>17 WOM\_0lfr6

TAGGCTTGTGCAGTGACCCAGTGACCCATACAGTAAGAATGATGACCAGATTTTCCAAA  
AGCACAAACACATAAGTTATGAAGAAGATGGAGAAAAGCAGAATTTGCA

>18 WOM\_0lfr6

TAGGCTTGTGCAGTGACCCAGTGACCCATACAGTAAGAATGATGACCAGATTTTCCAAA  
AGCACAAACACATAAGTTATGAAGAAGATGGAGAAAAGCAGAATTTGCAGCCATGGAGC  
AGTAGGGAAGCCCATG

>19 WOM\_0lfr6

TAGGCTTGTGCAGTGACCCAGTGACCCATACAGTAAGAATGATGACCAGATTTTCCAAA  
AGCACAAACGCATAAGTTATGAAGAAGATGGAGAAAAGCAGAATTTGCAGCCATGGAGC  
AGTAGGGAAGCCCATG

>20 WOM\_0lfr6

TAGGCTTGTGCAGTGACCCAGTGACCCATACAGTAAGAATGATGACCAGATTTTCCAAA  
AGCACAAACACATAAGTTATGAAGAAGATGGAGAAAAGCAGAATTTGTAGCCATGGAGC  
AGTAGGGAAGCCCATGAGGATGAACTCACTGATGTTGGTGATGTTTTCCATCCACAAAG  
TTGGATCACCAAATGACAAAAGATTGGATGCTAATATC

>21 WOM\_0lfr6

TAGGCTTGTGCAGTGACCCAGTGACCCATACAGTAAGAATGATGACCAGATTTTCCAAA  
AGCACAAACACATAAGTTATGAAGAAGATGGAGAAAAGCAGAATTTGCAGCCATGGAGC  
AGTAGGGAAGCCCATGAGGATGAACTCACTGATGTTGGTGATGTTTTCCATCCACAAAG  
TTGGATCACCAAATGACAAAAGATTGGATGCTAATATCAGAAAATTTAAGAATAAGATC  
CATGAGAGTACCATGGAACATTAGGCTGAAGATTAGTTTTATTATTATAAAAAATCTTAC  
TCTTGATTCCCTCATTTACCATGAGACTGATGTGGGAAAACAAGAGAGGCCATAAGATGAG  
TCCAGAAAAATAGAGACCTCTTACTTTATCCTGCTTTGTATTTAGCTCTGTAGTTGGAA  
GCAGTTGAGAATCACCAAACATTGCAGTTACTTAGCAAAGGGACTAGAAAAAGAAAGAG  
CCATCTTGTTGAACATTCACCAAATTTTTATATCTTGCATTTGTGATCTTCATTCTTCA  
TGGCAGCTTTTTGTTACTCCAAGATCATGTAATCTGATAAGTCAGAAAAAGAAAAATAA  
ACAACCTGATGTAGCTGACCCAGTAGATGCTCCAAGTAAGAAGTAGGTTTTCCAGACTGAT  
GGGCAGGTGTCTTTGAGAACAAAANACTTTGCCCCATATGAATCTTTGTCTTTGCATTAT  
TGGGCTTGCCTGATACTCCTAGAGGCCAGGATAGAAGAGGTTTTCTATTGTTGTGCTT  
TTTCTCCATCACTGTTTCATTGCCTTTTCTCAGTCTTCTCTCACTCTTTCTCTTACTTTTG  
CTCCTGACCTATTTCTCTTCCC

>22 WOM\_Olfr6

NTAGGCTTGTGCAGTGACCCAGTGACCCATACAGTAAGAATGATGACCAGATTTTCCAA  
AAGCACAAACACATAAGTTATGAAGAAGATGGAGAAAAGCAGAATTTGCAGCCATGGAG  
CAGTAGGGAAGCCCATGAGGATGAACTCACTGATGTTGGTGATGTTTTCCATCCACAAA  
GTTGGATCACCAAATGACAAAAGATTGGATGCTAATATCAGAAAATTTAAGAATAAGAT  
CCATGAGAGTACCATGGAACATTAGGCTGAAGATTAGTTTTATTATTATAAAAAATCTTA  
CTCTTGATTCCCTCATTTACCATGAGACTGATGTGGGAAACAAGAGAGGCCATAAGATGA  
GTCCAGAAAAATAGAGACCTCTTACTTTATCCTGCTTTGTATTTAGCTCTGTAGTTGGA  
AGCAGTTGAGAATCACCAAACATTGCAGTTACTTAGCAAAGGGACTAGAAAAAGAAAGA  
GCCATCTTGTTGAACATTCACCAAATTTTTATATCTTGCATTTGTGATCTTCATTCTTC  
ATGGCAGCTTTTTGTTACTCCAAGATCATGTAATCTGATAAGTCAGAAAAAGAAAAATA  
AACAACCTGATGTAGCTGACCCAGTAGATGCTCCAAGTAAGAAGTAGGTTTTCCAGACTGA  
TGGGCAGGTGTCTTTGAGAACAAAANACTTTGCCCCATATGAATCTTTGTCTTTGCATTA  
TTGGGCTTGCCTGATACTCCTAGAGGCCAGGATAGAAGAGGT

>23 WOM\_Olfr6

TAGGCTTGTGCAGTGACCCAGTGACCCATACAGTAAGAATGATGACCAGATTTTCCAAA  
AGCACAAACACATAAGTTATGAAGA

>24 WOM\_Olfr6

AGGCTTGTGCAGTGACCCAGTGACCCATACAGTAAGAATGATGACCAGATTTTCCAAA  
GCACAAACACATAAGTTATGAAGAAGATGGAGAAAAGCAGAATTTGCAGCCATGGAGCA  
GTAGGGAAGCCCATG

>25 WOM\_Olfr6

TAGGCTTGTGCAGTGACCCAGTGACCCATACAGTAAGAATGATGACCAGATTTTCCAAA  
AGCACAAACACATAAGTTATGAAGAAGATGGAGAAAAGCAGAATTTGCAGCCATGGAGC  
AGTAGGGAAGCCCATG

>26 WOM\_Olfr6

TAGGCTTGTGCAGTGACCCAGTGACCCATACAGTAAGAATGATGACCAGATTTTCCAAA  
AGCACAAACACATAAGTTATGAAGAAGATGGAGAAAAGCAGAATTTGCAGCCATGGAGC  
AGTAGGGAAGCCCATG

>27 WOM\_Olfr6

TAGGCTTGTGCAGTGACCCAGTGACCCATACAGTAAGAATGATGACCAGATTTTCCAAA  
AGCACAAACACATAAGTTATGAAGAAGATGGAGAAAAGCAGAATTTGCAGCCATGGAGC

AGTAGGGAAGCCCATGAGGATGAACTCACTGATGTTGGTGATGTTTTCCATCCACAAAG  
TTGGATCACCAAATGACAAAAGATTGGATGCTAATATCAGAAAATTTAAGAATAAGATC  
CATGAGAGTACCATGGAACATTAGGCTGAAGATTAGTTTTATTATTATAAAAATCTTAC  
TCTTGATTCCTCATTACCATGAGACTGATGTGGGAAACAAGAGAGGCCATAAGATGAG  
TCCAGAAAATAGAGACCTGTAACCACAGCACTCAGCAAATAAGGCAGAGACC

>28 WOM\_Olfr6

TAGGCTTGTGCAGTGACCCAGTGACCCATACAGTAAGAATGATGACCAGATTTTCCAAA  
AGCACAAACACATAAGTTATGAAGAAGATGGAGAAAAGCAGAATTTGCAGCCATGGAGC  
AGTAGGGAAGCCCATGAGGATGAACTCACTGATGTTGGTGATGTTTTCCATCCACAAAG  
TTGGATCACCAAATGACAAAAGATTGGATGCTAATATCAGAAAATTTAAGAATAAGATC  
CATGAGAGTACCATGGAACATTAGGCTGAAGATTAGTTTTATTATTATAA

>29 WOM\_Olfr6

TAGGCTTGTGCAGTGACCCAGTGACCCATACAGTAAGAATGATGACCAGATTTTCCAAA  
AGCACAAACACATAAGTTATGAAGAAGATGGAGAAAAGCAGAATTTGCAGCCATGGAGC  
AGTAGGGAAGCCCATG

>30 WOM\_Olfr6

TAGGCTTGTGCAGTGACCCAGTGACCCATACAGTAAGAATGATGACCAGATTTTCCAAA  
AGCACAAACACATAAGTTATGAAGAAGATGGAGAAAAGCAGAATTTGCAGCCATGGAGC  
AGTAGGGAAGCCCATG

>31 WOM\_Olfr6

TAGGCTTGTGCAGTGACCCAGTGACCCATACAGTAAGAATGATGACCAGATTTTCCAAA  
AGCACAAACACATAAGTTATGGAGAAGATGGAGAAAAGCAGAATTTGCAGCCATGGAGC  
AGTAGGGAAGCCCATG

>32 WOM\_Olfr6

TTGTGCAGTGACCCAGTGACCCATACAGTAAGAATGATGACC

>33 WOM\_Olfr6

TAGGCTTGTGCAGTGACCCAGTGACCCATACAGTAAGAATGATGACCAGATTTTCCAAA  
AGCACAAACACATAAGTTATGAAGAAGATGGAGAAAAGCAGAATTTGCAGCCATGGAGC  
AGTAGGGAAGCCCATGAGGATG

>34 WOM\_Olfr6

TAGGCTTGTGCAGTGACCCAGTGACCCATACAGTAAGAATGATGACCAGATTTTCCAAA  
AGCACAAACACATAAGTTATGAAGAAGATGGAGAAAAGCAGAATTTGCAGCCATGGAGC  
AGTAGGGAAGCCCATGAGGATGAACTCACTGATGTTGGTGATGTTTTCCATCCACAAAG  
TTGGATCACCAAATGACAAAAGATTGGATGCTAATATCAGAAAATTTAAGAATAAGATC  
CATGAGAGTACCATGGAACATTAGGCTGAAGATTAGTTTTATTATTATAA

>35 WOM\_Olfr6

TAGGCTTGTGCAGTGACCCAGTGACCCATACAGTAAGAATGATGACCAGATTTTCCAAA  
AGCACAAACACATAAGTTATGAAGAAGATGGAGAAAAGCAGAATTTGCAGCCATGGAGC  
AGTAGGGAAGCCCATG

>36 WOM\_Olfr6

TAGGCTTGTGCAGTGACCCAGTGACCCATACAGTAAGAATGATGACCAGATTTTCCAAA  
AGCACAAACACATAAGTTATGAAGAAGATGGAGAAAAGCAGAATTTGCAGCCATGGAGC  
AGTAGGGAAGCCCATG

>1 OSNs\_Olfr6

GGCCGCGGAATTCGATTTAGGCTTGTGCAGTGACCCAGTGACCCATACAGTAAGAATG  
ATGACCAGATTTTCCAAAAGCACAAACACATAAGTTATGAAGAAGATGGAGAAAAGCAG

AATTTGCAGCCATGGAGCAGTAGGGAAGCCCATGAGGATGAACTCACTGATGTTGGTGA  
TGTTTTCCATCCACAAAGTTCGATCACCAAATGACAAAAGATTGGATGCTAATATCAGA  
AAATTTAAGAATAAGATCCATGAGAGTACCATGGAACATTAGGCTGAAGATTAGTTTTA  
TTATTATAAAAATCTTACTCTTGATTCCCTCATTTACCATGAGACTGATGTGGGAAACAA  
GAGAGGCCATAAGATGAGTCCAGAAAAATAGAGACCTCTTACTTTATCCTGCTTTGTAT  
TTAGCTCTGTAGTTGGAAGCAGTTGAGAATCACCAAACATTGCAGTTACTTAGCAAAGG  
GACTAGAAAAAGAAAGAGCCATCTTGTTGAACATTACCAAATTTTTATATCTTGCATT  
TGTGATCTTCATTCTTCATGGCAGCTTTTTGTTACTCCAAGATCATGTAATCTGATAAG  
TCAGAAAAAGAAAAATAAACAACTGATGTAGCTGACCCAGTAGATGCTCCAAGTAAGAA  
GTAGTTTTTCAGACTGATGGGCAGGTGTCTTTGAGAACAAAACTTTGCCCCATATGAA  
TCTTTGCTTTTGCATTATTGGGCTTGCCTGATACTCCTAGAGGCCAGGATAGAAGAGGT  
TTTCCTATTGTTGTGCTTTTTCTCCATCACTGTTTCATTGCCTTTCTCAGTCTTCTCTCA  
CTCTTTCTTACTCTTGCTCCTGACCTATTTCTCTTCCC

>2 OSNs\_Olfr6

GGCCGCGGGAATTCGATTTAGGCTTGTGCAGTGACCCAGTGACCCATACAGTAAGAATG  
ATGACCAGATTTTCCAAAAGCACAAACACATAAGTTATGAAGAAGATGGAGAAAAGCAG  
AATTTGCAGCCATGGAGCAGTAGGGAAGCCCATGAGGATGAACTCACTGATGTTGGTGA  
TGTTTTCCATCCACAAAGTTCGATCACCAAATGACAAAAGATTGGATGCTAATATCAGA  
AAATTTAAGAATAAGATCCATGAGAGTACCATGGAACATTAGGCTGAAGATTAGTTTTA  
TTATTATAAAAATCTTACTCTTGATTCCCTCATTTACCATGAGACTGATGTGGGAAACAA  
GAGAGGCCATAAGATGAGTCCAAAAAATAGAGACCTCTTACTTTCTCCTGCTTTGTAT  
TTAGCTCTGTAGTTGGAAGCAGTTGAGAACCACCAAACATTGCAGTTACTTAGCAAAGG  
GACTAGAAAAAGAAAGAGCCATCTTGTTGAACATTACCAAATTTTTATATCTTGCATT  
TGTGATCTTCATTCTTCATGGCAGCTTTTTGTTACTCCAAGATCATGTAATCTGATAAG  
TCAGAAAAAGAAAAATAAACAACTGATGTAGCTGACCCAGTAGATGCTCCAAGTAAGAT  
GTAGTTTTTTATTGGGCTTGCCTGATACTCCTAGAGGCCAGGATAGAAGAGGTTTTCT  
ATTGTTGTGCTTTTTCTCCATCACTGTTTCATTGCCTTTCTCAGTCTTCTCTCACTCTT  
CTCTTACTCTTGCTCCTGACCTATTTCTCTTCCC

>3 OSNs\_Olfr6

GGCCGCGGGAATTCGATTTAGGCTTGTGCAGTGACCCAGTGACCCATACAGTAAGAATG  
ATGACCAGATTTTCCAAAAGCACAAACACATAAGTTATGAAGAAGATGGAGAAAAGCAG  
AATTTGCAGCCATGGAGCAGTAGGGAAGCCCATGAGGATGAACTCACTGATGTTGGTGA  
TGTTTTCCATCCACAAAGTTGGATCACCAAATGACAAAAGATTGGATGCTCTTACTTTA  
TCCTGCTTTGTATTTAGCTCTGTAGTTGGAAGCAGTTGAGAATCACCAAACATTGCAGT  
TACTTAGCAAAGGGACTAGAAAAAGAAAGAGCCATCTTGTTGAACATTACCAAATTTT  
TATATCTTGCATTTGTGATCTTCATTCTTCATGGCAGCTTTTTGTTACTCCAAGATCAT  
GTAATCTGATAAGTCAGAAAAAGAAAAATAAACAACTGATGTAGCTGACCCAGTAGATG  
CTCCAAGTAAGAAGTAGGTTTTTCAGACTGATGGGCAGGTGTCTTTGAGAACAAAACTT  
TGCCCCATATGAATCTTTGTCTTTGCATTATTGGGCTTGCCTGATACTCCTAGAGGCCA  
GGATAGAAGAGGTTTTCTTATTGTTGTGCTTTTTCTCCATCACTGTTTCATTGCCTTTCT  
CAGTCTTCTCTCACTCC

>4 OSNs\_Olfr6

GGCCGCGGGAATTCGATTTAGGCTTGTGCAGTGACCCAGTGACCCATACAGTAAGAATG  
ATGACCAGATTTTCCAAAAGCACAAACACATAAGTTATGAAGAAGATGGAGAAAAGCAG  
AATTTGCAGCCATGGAGCAGTAGGGAAG

>5 OSNs\_Olfr6

TAGGCTTGTGCAGTGACCCAGTGACCCATACAGTAAGAATGATGACCAGATTTTCCAAA  
AGCACAAACACATAAGTTATGAAGAAGATGGAGAAAAGCAGAATTTGCAGCCATGGAGC  
AGTAGGGAAGCCCATGAGGATGAACTCACTGATGTTGGTGATGTTTTCCATCCACAAAG  
TTGGATCACCAAATGACAAAAGATTGGATGCTAATATCAGAAAATTTAAGAATAAGATC  
CATAAGAGTACCATGGAACATTAGGCTGAAGATTAGTTTTATTATTATAAAAAATCTTAC  
TCTTGATTCCCTCATTTACCATGAGACTGATGTGGGAAACAAGAGAGGCCATAAGATGAG  
TCCAGAAAAATAGAGACCTCTTACTTTATCCTGCTTTGTATTTAGCTCTGTAGTTGGAA  
GCAGTTGAGAATCACCAAACATTGCAGTTACTTAGCAAAGGGACTAGAAAAAGAAAGAG  
CCATCTTGTGAAACATTCACCAAATTTTTATATCTTGCATTTGTGATCTTCATTCTTCA  
TGGCAGCTTTTTGTTACTCCAAGATCATGTAATCTGATAAGTCAGAAAAAGAAAAATAA  
ACAACCTGATGTAGCTGACCCAGTAGATGCTCCAAGTAAGAAGTAGGTTTTAGACTGAT  
GGGCAGGTGTCTTTGAGAACAAAACTTTGCCCCATATGAATCTTTGTCTTTGCATTAT  
TGGGCTTGCCTGATACTCCTAGAGGCCAGGATAGAAGAGGTTTTCTTATTGTTGTGCTT  
TTTCTCCATCACTGTTTCATTGCCTTTTCTCC

>6 OSNs\_Olfr6

TAGGCTTGTGCAGTGACCCAGTGACCCATACAGTAAGAATGATGACCAGATTTTCCAAA  
AGCACAAACACATAAGTTATGAAGAAGATGGAGAAAAGCAGAATTTGCAGCCATGGAGC  
AGTAGGGAAGCCCATGAGGATGAACTCACTGATGTTGGTGATGTTTTCCATCCACAAAG  
TTNGATCACCAAATGACAAAAGATTGGATGCTAATATCAGAAAATTTAAGAATAAGATC  
CATGAGAGTACCATGGAACATTAGGCTGAAGATTAGTTTTATTATTATAAAAAATCTTAC  
TCTTGATTCCCTCATTTACCATGAGACTGATGTGGGAAACAAGAGAGGCCATAAGATGAG  
TCCAAAAAATAGAGACCTAAAACAAGAACACAGCCAAGAATGTTGAAACAACATTAT  
AAGGCCATATTTAAGGTTTAGGTCTTTGGGT

>7 OSNs\_Olfr6

TAGGCTTGTGCAGTGACCCAGTGACCCATACAGTAAGAATGATGACCAGATTTTCCAAA  
AGCACAAACACATAAGTTATGAAGAAGATGGAGAAAAGCAGAATTTGCAGCCATGGAGC  
AGTAGGGAAGCCCATGAGGATGAACTCACTGATGTTGGTGATGTTTTCCATCCACAAAG  
TTCGATCACCAAATGACAAAAGATTGGATGCTAATATCAGAAAATTTAAGAATAAGATC  
CATGAGAGTACCATGGAAC

>8 OSNs\_Olfr6

GGCCGCGGAATTCGATTTAGGCTTGTGCAGTGACCCAGTGACCCATACAGTAAGAATG  
ATGACCAGATTTTCCAAAAGCACAAAC

>9 OSNs\_Olfr6

TAGGCTTGTGCAGTGACCCAGTGACCCATACAGTAAGAATGATGACCAGATTTTCCAAA  
AGCACAAACACATAAGTTATGAAGAAGATGGAGAAAAGCAGAATTTGCAGCCATGGAGC  
AGTAGGGAAGCCCATGAGGATGAACTCACTGATGTTGGTGATGTTTTCCATCCACAAAG  
TTCGATCACCAAATGACAAAAGATTGGATGCTAATATCAGAAAATTTAAGAATAAGATC  
CATGAGAGTACCATGGAAC

>10 OSNs\_Olfr6

GGCCGCGGAATTCGATTTAGGCTTGTGCAGTGACCCAGTGACCCATACAGTAAGAATG  
ATGACCAGATTTTCCAAAAGCACAAACACATAAGTTATGAAGAAGATGGAGAAAAGCAG  
AATTTGCAGCCATGGAGCAGTAGGGAAGCCCATGAGGATGAACTCACTGATGTTGGTGA  
TGTTTTCCATCCACAAAGTTGGATCACCAAATGACAAAAGATTGGATGCTAATATCAGA  
AAATTTAAGAATAAGATCCATGAGAGTACCATGGAACATTAGGCTGAAGATTAGTTTTA  
TTATTATAAAAAATCTTACTCTTGATTCCCTCATTTACCATGAGACTGATGTGGGAAACA  
GAGAGGCCATAAGATGAGTCCAGAAAAATAGAGACCTCTTACTTTATCCTGCTTTGTAT  
TTAGCTCTGTAGTTGGAAGCAGTTGAGAATCACCAAACATTGCAGTTACTTAGCAAAG

GACTAGAAAAAGAAAGAGCCATCTTGTTGAACATTCACCAAATTTTTATATCTTGCATT  
TGTGATCTTCATTCTTCATGGCAGCTTTTTGTTACTCCAAGATCATGTAATCTGATAAG  
TCAGAAAAAGAAAAATAACAACCTGATGTAGCTGACCCAGTAGATGCTCCAAGTAAGAA  
GTAGGTTTTTCAGACTGATGGGCAGGTGTCTTTGAGAACAAAACTTTGCCCCATATGAA  
TCTTTGTCTTTGCATTATTGGGCTTGCCCTGATACTCCTAGAGGCCAGGATAGAAGAGGT  
TTTCCTATTGTTGTGCTTTTTCTCCATCACTGTTTCATTGCCTTTCTCAGTCTTCTCTCA  
CTCT

>11 OSNs\_Olfr6

AGGCTTGTGCAGTGACCCAGTGACCCATACAGTAAGAATGATGACCAGATNTTCCAAAA  
GCACAAACACATAAGTTATGAAGAAGATGGAGAAAAGCAGAATTTGCAGCCATGGAGCA  
GTAGGGAAGCCCATGAGGATGAACTCACTGATGTTGGTGTGTTTTCCATCCACAAAGT  
TCGATCACCAAATGACAAAAGATTGGATGCTAATATCAGAAAAATTAAGAATAAGATCC  
ATGAGAGTACCATGGAACATTAGGCTGAAGATTAGTTTTATTATTATAAAAAATCTTACT  
CTTGATTCCCTCATTTACCATGAGACTGATGTGGGAAACAAGAGAGGCCATAAGATGAGT  
CCAAAAAATAGAGACCTCTTACTTTCTCCTGCTTTGTATTTAGCTCTGTAGTTGGAAG  
CAGTTGAGAACCACCAAACATTGCAGTTACTTAGCAAAGGGACTAGAAAAAGAAAGAGC  
CATCTTGTGTAACATTCACCAAATTTTTATATCTTGCATTTGTGATCTTCATTCTTCAT  
GGCAGCTTTTTGTTACTCCAAGATCATGTAATCTGATAAGTCAGAAAAAGAAAAATAAA  
CAACTGATGTAGCTGACCCAGTAGATGCTCCAAGTAAGATGTAGGTTTTTATTGGGCTT  
GCCTGATACTCCTAGAGGCCAGGATAGAAGAGGTTTTTCCTATTGTTGTGCTTTTTCTCC  
ATCACTGTTTCATTGCCTTTCTCAGTCTTCTCTCACTCTTTCTCTT

>1 WOM\_Olfr19

CCCAATATNACNNTTTCNNTTNANNTAATAATGATATNGATAACCACAGCTT

>2 WOM\_Olfr19

TGTCTGCAAAGGACAGGTTGGAAAGGAAGAAGTACATGGGTGTGTGAAGATGGGAATCT  
GTAATGGTGGCAATGATAATGAGAAGGTTCCCAAGCAGAGTGACCAAGTACATGAACAA  
AAATAGTCCAAAAGGAAAGGTTGCCATAGAGGATCCTCTGAAATTTCCAGGAGAATAA  
ATTTTGAAATTTGTGTGTCATTTTTCAACTCCATATAGCTAATAAACCTGGATAGGGCT  
GCTGGATGAAAAGACCCTTGTGGAAATCTAATCTTTCCCCTGGATAGTTGAATATAAG  
GACTGAAAATAGTTCGAAGACAGCAGGAAGGGGTCATGAATCAGCTTCCAAGATAGCTG  
AACACCCTTAAGAAAACGGAAATGTTCTGTCCACAGCAGTGTGTCATACC

>3 WOM\_Olfr19

AAGGACAGGTTGGAAAGGAAGAAGTACATGGGTGTGTGAAGATGGGAATCTGTAATGGT  
GGCAATGATAATGAGAAGGTTCCCAAGCAGAGTGACCAAGTACATGAACAAAAATAGTC  
CAAAAAGGAAAGGTTGCCATAGAGGATCCTCTGAAATTTCCAGGAGAATAAATTTTGAA  
ATTTGTGTGTCATTTTTCAACTCCATATAGCTAATAAACAGGTTGAGCTGGATAGGGCT  
GCTGGATGAAAAGACCCTTGTGGAAATCTAATCTTTCCCCTGGATAGTTGAATATAAG  
GACTGAAAATAGTTCGAAGACAGCAGGAAGGGGTCATGAATCAGCTTCCAAGATAGCTG  
AACACCCTTAAGAAAACGGAAATGTTCTGTCCACAGCAGTGTGTCATC

>4 WOM\_Olfr19

CAGATGTCTGCAAAGGACAGGTTGGAAAGGAAGAAGTACATGGGTGTGTGAAGATGGGA  
ATCTGTAATGGTGGCAATGATAATGAGAAGGTTCCCAAGCAGAGTGACCAAGTACATGA  
ACAAAAATAGTCCAAAAGGAAAGGTTGCCATAGAGGATCCTCTGAAATTTCCAGGAGA  
ATAAATTTTGAAATTTGTGTGTCATTTTTCAACTCCATATAGCTAATAAACAGGTTGAG  
CTGGATAGGGCTGCTGGATGAAAAGACCCTTGTGGAAATCTAATCTTTCCCCTGGATA  
GTTGAATATAAGGACTGAAAATAGTTCGAAGACAGCAGGAAGGGGTCATGAATCAGCTT

CCAAGATAGCTGAACACCCTTAAGAAAACGGAAATGTTCTGTCCACAGCAGTGTTCAT  
C

>5 WOM\_Olfr19

TGTCTGCAAAGGACAGGTTGGAAAGGAAGAAGTACATGGGTGTGTGAAGATGGGAATCT  
GTAATGGTGGCAATGATAATGAGAAGGTTCCCAAGCAGAGTGACCAAGTACATGAACAA  
AAATAGTCCAAAAAGGAAAGGTTGCCATAGAGGATCCTCTGAAATTCCCAGGAGAGTAA  
ATTTTGAAATTTGTGTGTCATTTTTCAACTCCATGTAGCTAATAAACAGGTTGAGCTGG  
ATAGGGCTGCTGGATGAAAAGACCCTTGTGGAAATCTAATCTTTCCCCTGGATAGTTG  
AATATAAGGACTGAAAATAGTTCGAAGACAGCAGGAAGGGGTCATGAATCAGCTTCCAA  
GATAGCTGAACACCCTTAAGAAAACGGAAATGTTCTGTCCACAGCAGTGTTCATACGT  
GGAGACAAAGACAGGGGAGGTACTTAAAGGTCTGTGTC

>6 WOM\_Olfr19

TGTCTGCAAAGGACAGGTTGGAAAGGAAGAAGTACATGGGTGTGTGAAGATGGGAATCT  
GTAATGGTGGCAATGATAATGAGAAGGTTCCCAAGCAGAGTGACCAAGTACATGAACAA  
AAATAGTCCAAAAAGGAAAGGTTGCCATAGAGGATCCTCTGAAATTCCCAGGAGAATAA  
ATTTTGAAATTTGTGTGTCATTTTTCAACTCCATATAGCTAATAAACCTGGATAGGGCT  
GCTGGATGAAAAGACCCTTGTGGAAATCTAATCTTTCCCCTGGATAGTTGAATATAAG  
GACTGAAAATAGTTCGAAGACAGCAGGAAGGGGTCATGAATCAGCTTCCAAGATAGCTG  
AACACCCTTAAGAAAACGGAAATGTTCTGTCCACAGCAGTGTTCATACC

>7 WOM\_Olfr19

TGTCTGCAAAGGACAGGTTGGAAAGGAAGAAGTACATGGGTGTGTGAAGATGGGAATCT  
GTAATGGTGGCAATGATAATGAGAAGGTTCCCAAGCAGAGTGACCAAGTACATGAACAA  
AAATAGTCCAAAAAGGAAAGGTTGCCATAGAGGATCCTCTGAAATTCCCAGGAGAATAA  
ATTTTGAAATTTGTGTGTCATTTTTCAACTCCATATAGCTAATAAACCTGGATAGGGCT  
GCTGGATGAAAAGACCCTTGTGGAAATCTAATCTTTCCCCTGGATAGTTGAATATAAG  
GACTGAAAATAGTTCGAAGACAGCAGGAAGGGGTCATGAATCAGCTTCCAAGATAGCTG  
AACACCCTTAAGAAAACGGAAATGTTCTGTCCACAGCAGTGTTCAT

>8 WOM\_Olfr19

TGTCTGCAAAGGACAGGTTGGAAAGGAAGAAGTACATGGGTGTGTGAAGATGGGAATCT  
GTAATGGTGGCAATGATAATGAGAAGGTTCCCAAGCAGAGTGACCAAGTACATGAACAA  
AAATAGTCCAAAAAGGAAAGGTTGCCATAGAGGATCCTCTGAAATTCCCAGGAGAATAA  
ATTTTGAAATTTGTGTGTCATTTTTCAACTCCATATAGCTAATAAACCTGGATAGGGCT  
GCTGGATGAAAAGACCCTTGTGGAAATCTAATCTTTCCCCTGGATAGTTGAATATAAG  
GACTGAAAATAGTTCGAAGACAGCAGGAAGGGGTCATGAATCAGCTTCCAAGATAGCTG  
AACACCCTTAAGAAAACGGAAATGTTCTGTCCACAGCAGTGTTCATACGTGGAGACAA  
AGACAGGGGAGGTACC

>9 WOM\_Olfr19

TGTCTGCAAAGGACAGGTTGGAAAGGAAGAAGTACATGGGTGTGTGAAGATGGGAATCT  
GTAATGGTGGCAATGATAATGAGAAGGTTCCCAAGCAGAGTGACCAAGTACATGAACAA  
AAATAGTCCAAAAAGGAAAGGTTGCCATAGAGGATCCTCTGAAATTCCCAGGAGAATAA  
ATTTTGAAATTTGTGTGTCATTTTTCAACTCCATATAGCTAATAAACCTGGATAGGGCT  
GCTGGATGAAAAGACCCTTGTGGAAATCTAATCTTTCCCCTGGATAGTTGAATATAAG  
GACTGAAAATAGTTCGAAGACAGCAGGAAGGGGTCATGAATCAGCTTCCAAGATAGCTG  
AACACCCTTAAGAAAACGGAAATGTTCTGTCCACAGCAGTGTTCATACC

>1 OSNs\_Olfr19



TGTCTGCAAAGGACAGGTTGGAAAGGAAGAAGTACATGGGTGTGTGAAGATGGGAATCT  
GTAATGGTGGCAATGATAATGAGAAGGTTCCCAAGCAGAGTGACCAAGTACATGAACAA  
AAATAGTCCAAAAAGGAAAGGTTGCCATAGAGGATCCTCTGAAATTCCCAGGAGAATAA  
ATTTTGAAATTTGTGTGTCATTTTTCAACTCCATATAGCTAATAAACAGGTTGAGCTGG  
ATAGGGCTGCTGGATGAAAAGACCCTTGTTGGAAATCTAATCTTTCCCCTGGATAGTTG  
AATATAAGGACTGAAAATAGTTTCGAAGACAGCAGGAAGGGGTCATGAATCAGCTTCCAA  
GATAGCTGAACACCCTTAAGAAAACGGAAATGTTCTGTCCACAGCAGTGTTCATACC  
>2 OSNs\_Olfr19

TGTCTGCAAAGGACAGGTTGGAAAGGAAGAAGTACATGGGTGTGTGAAGATGGGAATCT  
GTAATGGTGGCAATGATAATGAGAAGGTTCCCAAGCAGAGTGACCAAGTACATGAACAA  
AAATAGTCCAAAAAGGAAAGGTTGCCATAGAGGATCCTCTGAAATTCCCAGGAGAATAA  
ATTTTGAAATTTGTGTGTCATTTTTCAACTCCATATAGCTAATAAACAGGTTGAGCTGG  
ATAGGGCTGCTGGATGAAAAGACCCTTGTTGGAAATCTAATCTTTCCCCTGGATAGTTG  
AATATAAGGACTGAAAATAGTTTCGAAGACAGCAGGAAGGGGTCATGAATCAGCTTCCAA  
GATAGCTGAACACCCTTAAGAAAACGGAAATGTTCTGTCCACAGCAGTGTTCATACC  
>3 OSNs\_Olfr19

TGTCTGCAAAGGACAGGTTGGAAAGGAAGAAGTACATGGGTGTGTGAAGATGGGAATCT  
GTAATGGTGGCAATGATAATGAGAAGGTTCCCAAGCAGAGTGACCAAGTACATGAACAA  
AAATAGTCCAAAAAGGAAAGGTTGCCATAGAGGATCCTCTGAAATTCCCAGGAGAATAA  
ATTTTGAAATTTGTGTGTCATTTTTCAACTCCATATAGCTAATAAACAGGTTGAGCTGG  
ATAGGGCTGCTGGATGAAAAGACCCTTGTTGGAAATCTAATCTTTCCCCTGGATAGTTG  
AATATAAGGACTGAAAATAGTTTCGAAGACAGCAGGAAGGGGTCATGAATCAGCTTCCAA  
GATAGCTGAACACCC  
>4 OSNs\_Olfr19

CGGGGAGANCTGGATAGGGCTGCTGGATGAAAAGACCCTTGTTGGAAATCTAATCTTTC  
CCCTGGATAGTTGAATATAAGGACTGAAAATAGTTTCGAAGACAGCAGGAAGGGGTCATG  
AATCAGCTTCCAAGATAGCTGAACACCCTTAAGAAAACGGAAATGTTCTGTCCACAGCA  
GTGTTGCATACC  
>5 OSNs\_Olfr19

TGTCTGCAAAGGACAGGTTGGAAAGGAAGAAGTACATGGGTGTGTGAAGATGGGAATCT  
GTAATGGTGGCAATGATAATGAGAAGGTTCCCAAGCAGAGTGACCAAGTACATGAACAA  
AAATAGTCCAAAAAGGAAAGGTTGCCATAGAGGATCCTCTGAAATTCCCAGGAGAATAA  
ATTTTGAAATTTGTGTGTCATTTTTCAACTCCATATAGCTAATAAACAGGTTGAGCTGG  
ATAGGGCTGCTGGATGAAAAGACCCTTGTTGGAAATCTAATCTTTCCCCTGGATAGTTG  
AATATAAGGACTGAAAATAGTTTCGAAGACAGCAGGAAGGGGTCATGAATCAGCTTCCAA  
GATAGCTGAACACCCTTAAGAAAACGGAAATGTTCTGTCCACAGCAGTGTTCATACC  
>6 OSNs\_Olfr19

TGTCTGCAAAGGACAGGTTGGAAAGGAAGAAGTACATGGGTGTGTGAAGATGGGAATCT  
GTAATGGTGGCAATGATAATGAGAAGGTTCCCAAGCAGAGTGACCAAGTACATGAACAA  
AAATAGTCCAAAAAGGAAAGGTTGCCATAGAGGATCCTCTGAAATTCCCAGGAGAATAA  
ATTTTGAAATTTGTGTGTCATTTTTCAACTCCATATAGCTAATAAACCTGGATAGGGCT  
GCTGGATGAAAAGACCCTTGTTGGAAATCTAATCTTTCCCCTGGATAGTTGAATATAAG  
GACTGAAAATAGTTTCGAAGACAGCAGGAAGGGGTCATGAATCAGCTTCCAAGATAGCTG  
AACACCCTTAAGAAAACGGAAATGTTCTGTCCACAGCAGTGTTCATACC  
>7 OSNs\_Olfr19  
CANAAAACTAATAAANCTGGATAGGGCTGCTGGATGAAAAGACCCTTGTTGGAAATCTA  
ATCTTTCCCCTGGATAGTTGAATATAAGGACTGAAAATAGTTTCGAAGACAGCAGGAAGG

GGTCATGAATCAGCTTCCAAGATAGCTGAACACCCTTAAGAAAACGGAAATGTTCTGTC  
CACAGCAGTGTTGCATACC

>1 WOM\_Olfr49

GCATGGCAAAGTTGCGGAGGAAGTAATACATGGGGGTGTAAAGGCGCCTGTCCACAAGG  
GTGATGAAGATGATGAGGAAGTTTCCCAGCAGAATGAGGAAGTAGGTCAGGAGAAAGCC  
CAGGAATATGAGCACCTGCAGCTCACAGGCATCTGACAGCCCCAGCAAATAAACTCAG  
TAACAGTAGTGCTGTTTCGCCATGGCTCCTCCCACCTCTGCTGGGGATGGTCATGGACCC  
TGCTGAGCATCAGAGCCTGTGAGCTCTGAGGACAACACAAAGCTGTGTGTATATGTCTG  
GGTGAGTGCAGGTGTGTGATGTGAGTGCAGATGCCCTCAGTAACCAGCAGTACTGGATC  
CCCTGGAGCTGAAGTTGCCCGACACGGAGGCTGGGAGTTGAAGTCGGTCCTCTGCTGGA  
GCAGTATGTGCTCCTAGCTTCTTAACCATCTCTTCATTCCCAGTCTGTGAAGATTTTGA  
TGCAGGGCTGAGAGGTAGCTCAGCGGCACACCCCTTGTCTGGTGTGCGTGAGGCTGGTT  
TCAAACACCACAGTTCTGTTTTCTCTTTCTCTGTTGCGTTTTCTATCGTTATTTAATCT  
ACATATTGGTTTATACAGATTATGCATTTTACCCTTCTTCTTTTAAGATAGTAATAAAA  
TAAAATGACATTATTATAAACTTTTTGTAATTATTTGGCTACTATTTTTGAAGACTTCA  
GGTACACGAAACTGATACATAGATAAGAAAGCATGCATTTTTATCATGTTTAGCTTTTG  
TATAACATCCTCAATAATCAACACAAATAACCACTCAGAGTCATCCATGGATTCAATCT  
CAATTGTTGAGATTATGTTTTTACCTTAAGGTCTACCGTATGTTCTGCAGATCACAATC  
AGGCAGCTCTTGTCCCATTACACTTCACTAAACCT

>2 WOM\_Olfr49

GCATGGCAAAGTTGCGGAGGAAGTAATACATGGGGGTGTAAAGGCGCCTGTCCACAAGG  
GTGATGAAGATGATGAGGAAGTTTCCCAGCAGAATGAGGAAGTAGGTCAGGAGAAAGCC  
CAGGAATATGAGCACCTGCAGCTCACAGGCATCTGACAGCCCCAGCAAATAAACTCAG  
TAACAGTAGTGCTGTTTCGCCATGGCTCCTCCCACCTCTGCTGGGGATGGTCATGGACCC  
TGCTGAGCATCAGAGCCTGTGAGCTCTGAGGACAACACAAAGCTGTGTGTATATGTCTG  
GGTGAGTGCAGGTGTGTGATGTGAGTGCAGATGCCCTCAGTAACCAGCAGTACTGGATC  
CCCTGGAGCTGAAGTTGCCCGACACGGAGGCTGGGAGTTGAAGTCGGTCCTCTGCTGGA  
GCAGTATGTGCTCCTAGCTTCTTAACCATCTCTTCATTCCCAGTCTGTGAAGATTTTGA  
TGCAGGGCTGAGAGGTAGCTCAGCGGCACACCCCTTGTCTGGTGTGCGTGAGGCTGGTT  
TCAAACACCACAGTTCTGTTTTCTCTTTCTCTGTTGCGTTTTCTATCGTTATTTAATCT  
ACATATTGGTTTATACAGATTATGCATTTTACCCTTCTTCTTTTAAGATAGTAATAAAA  
TAAAATGACATTATTATAAACTTTTTGTAATTATTTGGCTACTATTTTTGAAGACTTCA  
GGTACACGAAACTGATACATAGATAAGAAAGCATGCATTTTTATCATGTTTAGCTTTTG  
TATAACATCCTCAATAATCAACACAAATAACCACTCAGAGTCATCCATGGATTCAATCT  
CAATTGTTGAGATTATGTTTTTACCTTAAGGTCTACCGTATGTTCTGCAGATCACAATC  
AGGCAGCTCTTGTCCCATTACACTTCACTAAACCTTCAGTTTTTCCAGCGACCCACCTC  
CCTTGCAATACTC

>3 WOM\_Olfr49

GCATGGCAAAGTTGCGGAGGAAGTAATACATGGGGGTGTAAAGGCGCCTGTCCACAAGG  
GTGATGAAGATGATGAGGAAGTTTCCCAGCAGAATGAGGAAGTAGGTCAGGAGAAAGCC  
CAGGAATATGAGCACCTGCAGCTCACAGGCATCTGACAGCCCCAGCAAATAAACTCAG  
TAACAGTAGTGCTGTTTCGCCATGGCTCCTCCCACCTCTGCTGGGGATGGTCATGGACCC  
TGCTGAGCATCAGAGCCTGTGAGCTCTGAGGACAACACAAAGCTTAAGGTCTACCGTAT  
GTTCTGCAGATCACAATCAGGCAGCTCTTGTCCCATTACACTTCACTAAACCTTCAGTT  
TTTCCGGCGACCCACCTCCCTTGCAATACTCCCTCCCTCGGTCTCTCAGAAGTGAGTT

GTCTCTGGGTACTTACTAGAAATTGGGATTACCAACTCATTGACTGCTAGGGCTCCTAAC  
CCCAAGTGTAC

>4 WOM\_Olfr49

GCATGGCAAAGTTGCGGAGGAAGTAATACATGGGGGTGTAAAGGCGCCTGTCCACAAGG  
GTGATGAAGATGATGAGGAAGTTTCCCAGCAGAATGAGGAAGTAGGTCAGGAGAAAGCC  
CAGGAATATGAGCACCTGCAGCTCACAGGCATCTGACAGCCCCAGCAAAATAAACTCAG  
TAACAGTAGTGCTGTTTCGCCATGGCTCCTCCCACCTCTGCTGGGGATGGTCATGGACCC  
TGCTGAGCATCAGAGCCTGTGAGCTCTGAGGACAACACAAAGCTGTGTGTATATGTCTG  
GGTGAGTGCAGGTGTGTGATGTGAGTGCAGATGCCCTCAGTAACCAGCAGTACTGGATC  
CCCTGGAGCTGAAGTTGCCCGACACGGAGGCTGGGAGTTGAAGTCGGTCCTCTGCTGGA  
GCAGTATGTGCTCCTAGCTTCTTAACCATCTCTTCATTCCCAGTCTTAAGGTCTACTGT  
ATGTTCTGCAGATCACAATCAGGCAGCTCTTGTCCCATTACACTTCACTAAACCTTCAG  
TTTTTCCAGCGACCCACCTCCCTTGCAATACTCCCTCCCTCGGTCCCTCAGAAAGTGAG  
TTGTCTCTGGGTACTTACTAGAAATTGGGATTACCAACTCATTGACTGCTAGGGCTCCTA  
ACCCAAGTGTACCC

>5 WOM\_Olfr49

GCATGGCAAAGTTGCGGAGGAAGTAATACATGGGGGTGTAAAGGC

>6 WOM\_Olfr49

GCATGGCAAAGTTGCGGAGGAAGTAATACATGGGGGTGTAAAGGC

>7 WOM\_Olfr49

ATGAAGATGATGAGGAAGTTTCCCAGCAGAATGAGGAAGTAGGTCAGGAGAAAGCCCAG  
GAATATGAGCACCTGCAGNTNNNAGGCANNTGACAGCCCCAGCAAAATAANNNCAGTAA  
CAGTAGTGCTGTTTCGCCATGACTCCTNCCACCTCTGCTGGGGATGGTCATGGACCCTGC  
TGAGCATCAGAGCCTGTGAGCTCTGAGGACAACACAAAGCTGTGTGTATATGTCTGGGT  
GAGTGCAGGTGTGTGATGTGAGTGCAGATGCCCTCAGTAACCAGCAGTACTGGATCCCC  
TGGAGCTGAAGTTGCCCGACACGGAGGCTGGGAGTTGAAGTCGGTCCTCTGCTGGAGCA  
GTATGTGCTCCTAGCTTCTTAACCATCTCTTCATTCCCAGTCTGTGAAGATTTTGATGC  
AGGGCTGAGAGGTAGCTCAGCGGCACACCCCTTGTCTGGTGTGCGTGAGGCTGGTTTCA  
AACACCACAGTTCTGTTTTCTCTTTCTCTGTTGCGTTTTTCTATCGTTATTTAATCTACA  
TATTGGTTTATAACAGATTATGCATTTTACCCTTCTTCTTTTAAGATAGTAATAAAATAA  
AATGACATTATTATAAACTTTTTGTAATTATTTGGCTACTATTTTTGAAGACTTCAGGT  
ACACGAAACTGATACATAGATAAGAAAGCATGCATTTTTATCATGTTTAGCTTTTGTAT  
AACATCCTCAATAATCAACACAAATAACCACTCAGAGTCATCCATGGATTCAATCTCAA  
TTGTTTACAGATTATGTTTTTACCTTAAGGTCTACCGTATGTTCTGCAGATCACAATCAGG  
CAGCTCTTGTCCCATTACACTTCACTAAACCTTCAGTTTTTCCAGCGACCCACCTCCCT  
TGCAATACTCCCTCCCTCGGTCCCTCAGAAAGTGAGTTGTCTCTGGGTACTTACTAGAA  
TTGGGATTACCAACTCATTGACTGCTAGGGCTCCTAACCCCAAGTGTCACAGTTGGGAC  
CCTTGCCTGAGAAAGTTAAATATACATCTATAGTTTCTGTAGTAGAGAGACAGACATCA  
ATGGATGACTTGTGTC

>8 WOM\_Olfr49

GCATGGCAAAGTTGCGGAGGAAGTAATACATGGGGGTGTAAAGGCGCCTGTCCACAAGG  
GTGATGAAGATGATGAGGAAGTTTCCCAGCAGAATGAGGAAGTAGGTCAGGAGAAAGCC  
CAGGAATATGAGCACCTGCAGCTCACAGGCATCTGACAGCCCCAGCAAAATAAACTCAG  
TAACAGTAGTGCTGTTTCGCCATGGCTC

>9 WOM\_Olfr49

GCATGGCAAAGTTGCGGAGGAAGTAATACATGGGGGTGTAAAGGCGCCTGTCCACAAGG  
GTGATGAAGATGATGAGGAAGTTTCCCAGCAGAATGAGGAAGTAGGTCAGGAGAAAGCC

CAGGAATATGAGCACCTGCAGCTCACAGGCATCTGACAGCCCCAGCAAAATAAACTCAG  
TAACAGTAGTGCTGTTTCGCCATGGCTCCTCCCACCTCTGCTGGGGATGGTCATGGACCC  
TGCTGAGCATCAGAGCCTGTGAGCTCTGAGGACAACACAAAGCTGTGTGTATATGTCTG  
GGTGAGTGCAGGTGTGTGATGTGAGTGCAGATGCCCTCAGTAACCAGCAGTACTGGATC  
CCCTGGAGCTGAAGTTGCCCCGACACGGAGGCTGGGAGTTGAAGTCGGTCCTCTGCTGGA  
GCAGTATGTGCTCCTAGCTTCTTAACCATCTCTTCATTCCCAGTATGCTGCTCGTGATC  
TTCCAGTCCCCTGTGCCACAGAAGACTCTGGGGTACAGCAATCAGGGTAGACCCTTT  
GTTTCTGTGTACTGGGAAGAGGCCTGAGGTATTAGACATTCTCTTTGGTCTCTATGGGA  
ATTCC

>10 WOM\_Olfr49

GCATGGCAAAGTTGCGGAGGAAGTAATACATGGGGGTGTAAAGGCGCCTGTCCACAAGG  
GTGATGAAGATGATGAGGAAGTTTCCCAGCAGAATGAGGAAGTAGGTCAGGAGAAAGCC  
CAGGAATATGAGCACCTGCAGCTCACAGGCATCTGACAGCCCCAGCAAAATAAACTCAG  
TAACAGTAGTGCTGTTTCGCCATGGCTCCTCCCACCTCTGCTGGGGATGGTCATGGACCC  
TGCTGAGCATCAGAGCCTGTGAGCTCTGAGGACAACACAAAGCTGTGTGTATATGTCTG  
GGTGAGTGCAGGTGTGTGATGTGAGTGCAGATGCCCTCAGTAACCAGCAGTACTGGATC  
CCCTGGAGCTGAAGTTGCCCCGACACGGAGGCTGGGAGTTGAAGTCGGTCCTCTGCTGGA  
GCAGTATGTGCTCCTAGCTTCTTAACCATCTCTTCATTCCCAGTATGCTGCTCGTGATC  
TTCCAGTCCCCTGTGCCACAGAAGACTCTGGGGTACAGCAATCAGGGTAGACCCTTT  
GTTTCTC

>11 WOM\_Olfr49

GCATGGCAAAGTTGCGGAGGAAGTAATACATGGGGGTGTAAAGGCGCCTGTCCACAAGG  
GTGATGAAGATGATGAGGAAGTTTCCCAGCAGAATGAGGAAGTAGGTCAGGAGAAAGCC  
CAGGAATATGAGCACCTGCAGCTCACAGGCATCTGACAGCCCCAGCAAAATAAACTCAG  
TAACAGTAGTGCTGTTTCGCCATGGCTCCTCCCACCTCTGCTGGGGATGGTCATGGACCC  
TGCTGAGCATCAGAGCCTGTGAGCTCTGAGGACAACACAAAGCTGTGTGTATATGTCTG  
GGTGAGTGCAGGTGTGTGATGTGAGTGCAGATGCCCTCAGTAACCAGCAGTACTGGATC  
CCCTGGAGCTGAAGTTGCCCCGACACGGAGGCTGGGAGTTGAAGTCGGTCCTCTGCTGGA  
GCAGTATGTGCTCCTAGCTTCTTAACCATCTCTTCATTCCCAGTTAGAATTGGGATTAC  
CAACTCATTGGCTGCTAGGGCTCCTAACCCCAAGTGTACC

>12 WOM\_Olfr49

GCATGGCAAAGTTGCGGAGGAAGTAATACATGGGGGTGTAAAGGCGCCTGTCCACAAGG  
GTGATGAAGATGATGAGGAAGTTTCCCAGCAGAATGAGGAAGTAGGTCAGGAGAAAGCC  
CAGGAATATGAGCACCTGCAGCTCACAGGCATCTGACAGCCCCAGCAAAATAAACTCAG  
TAACAGTAGTGCTGTTTCGCCATGGCTCCCCATGTC

>13 WOM\_Olfr49

GCATGGCAAAGTTGCGGAGGAAGTAATACATGGGGGTGTAAAGGCGCCTGTCCACAAGG  
GTGATGAAGATGATGAGGAAGTTTCCCAGCAGAATGAGGAAGTAGGTCAGGAGAAAGCC  
CAGGAATATGAGCACCTGCAGCTCACAGGCATCTGACAGCCCCAGCAAAATAAACTCAG  
TAACAGTAGTGCTGTTTCGCCATGGCTC

>14 WOM\_Olfr49

GCATGGCAAAGTTGCGGAGGAAGTAATACATGGGGGTGTAAAGGCGCCTGTCCACAAGG  
GTGATGAAGATGATGAGGAAGTTTCCCAGCAGAATGAGGAAGTAGGTCAGGAGAAAGCC  
CAGGAATATGAGCACCTGCAGCTCACAGGCATCTGACAGCCCCAGCAAAATAAACTCAG  
TAACAGTAGTGCTGTTTCGCCATGGCTCCTCCCACCTCTGCTGGGGATGGTCATGGACCC  
TGCTGAGCATCAGAGCCTGTGAGCTCTGAGGACAACACAAAGCTTAAGGTCTACCGTAT  
GTTCTGCAGATCACAATCAGGCAGCTCTTGTTCCATTACTTCACTAAACCTTCAGTT

TTTCCAGCGACCCACCTCCCTTGCAATACTCCCTCCCTCGGCCCTCTCAGAAGTGAGTT  
GTCTCTGGGTACTIONACTAGAAATTGGGATTACCAACTCATTGACTGCTAGGGCTCCTAAC  
CCCAAGTGTCACC

>15 WOM\_Olfr49

GCATGGCAAAGTTGCGGAGGAAGTAATACATGGGGGTGTAAAGGCGCCTGTCCACAAGG  
GTGATGAAGATGATGAGGAAGTTTCCCAGCAGAATGAGGAAGTAGGTCAGGAGAAAGCC  
CAGGAATATGAGCACCTGCAGCTCACAGGCATCTGACAGCCCCAGCAAATAAACTCAG  
TAACAGTAGTGCTGTTTCGCCATGGCTCCTCCCACCTCTGCTGGGGATGGTCATGGACCC  
TGCTGAGCATCAGAGCCTGTGAGCTCTGAGGACAACACAAAGCTGTGTGTATATGTCTG  
GGTGAGTGCAGGTGTGTGATGTGAGTGCAGATGCCCTCAGTAACCAGCAGTACTGGATC  
CCCTGGAGCTGAAGTTGCCCGACACGGAGGCTGGGAGTTGAAGTCGGTCCTCTGCTGGA  
GCAGTATGTGCTCCTAGCTTCTTAACCATCTCTTCATTCCCAGTATGCTGCTCGTGATC  
TTCCAGTCCCAGTGTGCCACAGAAGACTCTGGGGTACAGCAATCAGGGTAGACCCTTT  
GTTTCTGTGCACTGGGAAGAGGCCTGAGGTATTAGACATTCTCTTTGGTCTCTATGGGA  
ATTTCGAGATGTGCAAAGATGCATGGCTCC

>16 WOM\_Olfr49

GCATGGCAAAGTTGCGGAGGAAGTAATACATGGGGGTGTAAAGGCGCCTGTCCACAAGG  
GTGATGAAGATGATGAGGAAGTTTCCCAGCAGAATGAGGAAGTAGGTCAGGAGAAAGCC  
CAGGAATATGAGCACCTGCAGCTCACAGGCATCTGACAGCCCCAGCAAATAAACTCAG  
TAACAGTAGTGCTGTTTCGCCATGGCTCCTCCCACCTCTGCTGGGGATGGTCATGGACCC  
TGCTGAGCATCAGAGCCTGTGAGCTCTGAGGACAACACAAAGCTGTGTGTATATGTCTG  
GGTGAGTGCAGGTGTGTGATGTGAGTGCAGATGCCCTCAGTAACCAGCAGTACTGGATC  
CCCTGGAGCTGAAGTTGCCCGACACGGAGGCTGGGAGTTGAAGTCGGTCCTCTGCTGGA  
GCAGTATGTGCTCCTAGCTTCTTAACCATCTCTTCATTCCCAGTATGCTGCTCGTGATC  
TTCCAGTCCCAGTGTGCCACAGAAGACTCTGGGGTACAGCAATCAGGGTAGACCC

>17 WOM\_Olfr49

GCATGGCAAAGTTGCGGAGGAAGTAATACATGGGGGTGTAAAGGCGCCTGTCCACAAGG  
GTGATGAAGATGATGAGGAAGTTTCCCAGCAGAATGAGGAAGTAGGTCAGGAGAAAGCC  
CAGGAATATGAGCACCTGCAGCTCACAGGCATCTGACAGCCCCAGCAAATAAACTCAG  
TAACAGTAGTGCTGTTTCGCCATGGCTCCTCCCACCTCTGCTGGGGATGGTCATGGACCC  
TGCTGAGCATCAGAGCCTGTGAGCTCTGAGGACAACACAAAGCTGTGTGTATATGTCTG  
GGTGAGTGCAGGTGTGTGATGTGAGTGCAGATGCCCTCAGTAACCAGCAGTACTGGATC  
CCCTGGAGCTGAAGTTGCCCGACACGGAGGCTGGGAGTTGAAGTCGGTCCTCTGCTGGA  
GCAGTATGTGCTCCTAGCTTCTTAACCATCTCTTCATTCCCAGTTAGAATTGGGATTAC  
CAACTCATTGACTGCTAGGGCTCCTAACCCCAAGCGTCACC

>1 OSNs\_Olfr49

GCATGGCAAAGTTGCGGAGGAAGTAATACATGGGGGTGTAAAGGCGCCTGTCCACAAGG  
GTGATGAAGATGATGAGGAAGTTTCCCAGCAGAATGAGGAAGTAGGTCAGGAGAAAGCC  
CAGGAATATGAGCACCTGCAGCTCACAGGCATCTGACAGCCCCAGCAAATAAACTCAG  
TAACAGTAGTGCTGTTTCGCCATGGCTCCTCCCACCTCTGCTGGGGATGGTCATGGACCC  
TGCTGAGCATCAGAGCCTGTGAGCTCTGAGGACAACACAAAGCTGTGTGTATATGTCTG  
GGTGAGTGCAGGTGTGTGATGTGAGTGCAGATGCCCTCAGTAAC

>2 OSNs\_Olfr49

CCGCGAATTCAGTAGTGATTGCATGGCAAAGTTGCGGAGGAAGTAATACATGGGGGTGT  
AAAGGCGCCTGTCCACAAGGGTATGAAGATGATGAGGAAGTTTCCCAGCAGAATGAGG  
AAGTAGGTCAGGAGAAAGCCCAGGAATATGAACACCTGCAGCTCACAGGCATCTGACAG

CCCCAGCAAAATAAACTCAGTAACAGTAGTGCTGTTGCGCCATGGCTCCTCCCACCTCTG  
CTGGGGATGGTCATGGACCCTGCTGAGCATCAGAGCCTGTGAGCTCTGAGGACAACACA  
AAGCTGTGTGTATATGTCTGGGTGAGTGCAGGTGTGTGATGTGAGTGCAGATGCCCTCA  
GTAACCAGCAGTACTGGATCCCCCTGGAGCTGAAGTTGCCCGACACGGAGGCTGGGAGTT  
GAAGTCGGTCTCTGCTGGAGCAGTATGTGCTCCTAGCTTCTTAACCATCTCTTCATTC  
CCAGTTAGAATTGGGATTACCAACTCATTGACTGCTAGGGCTCCTAACCCCAAGTGTC  
CAGTTGGGACCCTTGCCTGAGAAAGTTAAATATACATCTATAGTTTCTGTAGTAGAGAG  
ACAGACATCAATGGATGACTTGTGTGACTGGCTCTTACATGCTGCTCGTGATCTTCCAG  
TCCCAGTGTGCCACAGAAGACTCTGGGGTACAGCAATCAGGGTAGACCCTTTGTTTCC  
>3 OSNs\_0lfr49

CAGGGGGCGGAGCCTATGGAAAAACGCCAGCAACGCGGCCTTTTTACGGTTCCTGGCC  
TTTTGCTGGCCTTTTGCTCACATGTTCTTTTCTGCGTTATCCCCTGATTCTGTGGATAA  
CCGTATTACCGCCTTTGAGTGAGCTGATACCGCTCGCCGCAGCCGAACGACCGAGCGCA  
GCGAGTCAGTGAGCGAGGAAGCGGAAGAGCGCCCAATACGCAAACCGCCTCTCCCCGCG  
CGTTGGCCGATTCATTAATGCAGCTGGCACGACAGGTTTCCCGACTGGAAAGCGGGCAG  
TGAGCGCAACGCAATTAATGTGAGTTAGCTCACTCATTAGGCACCCAGGCTTTACACT  
TTATGCTTCCGGCTCGTATGTTGTGTGGAATTGTGAGCGGATAACAATTTACACAGGA  
AACAGCTATGACCATGATTACGCCAAGCTATTTAGGTGACACTATAGAATACTCAAGCT  
ATGCATCCAACGCGTTGGGAGCTCTCCCATATGGTCGACCTGCAGGCGGCCGCGAATTC  
ACTAGTGATTGCATGGCAAAGTTGCGGAGGAAGTAATACATGGGGGTGTAAAGGCGCCT  
GTCCACAAGGGTGATGAAGATGATGAGGAAGTTTCCCAGCAGAATGAGGAAGTAGGTCA  
GGAGAAAGCCCAGGAATATGAGCACCTGCAGCTCACAGGCATCTGACAGCCCCAGCAAA  
ATAAACTCAGTAACAGTAGTGCTGTTGCGCCATGGCTCCTCCCACCTCTGCTGGGGATGG  
TCATGGACCCTGCTGAGCATCAGAGCCTGTGAGCTCTGAGGACAACACAAAGCTGTGTG  
TATATGTCTGGGTGAGTGCAGGTGTGTGATGTGAGTGCAGATGCCCTCAGTAACCAGCA  
GTAAGTGGATCCCCCTGGAGCTGAAGTTGCCCGACACGGAGGCTGGGAGTTGAAGTCGGTC  
CTCTGCTGGAGCAGTATGTGCTCCTAGCTTCTTAACCATCTCTTCATTCCCAGTATGCT  
GCTCGTGATCTTCCAGTCCCAGTGTGCCACAAAAGACTCTGGGGTACAGCAATCAGGG  
TAGACCCTTTGTTTCTC

>4 OSNs\_0lfr49

GCATGGCAAAGTTGCGGAGGAAGTAATACATGGGGGTGTAAAGGCGCCTGTCCACAAGG  
GTGATGAAGATGATGAGGAAGTTTCCCAGCAGAATGAGGAAGTAGGTGAGGAGAAAGCC  
CAGGAATGTGAGCACCTGCAGCTCACAGGCATCTGACAGCCCCAGCAAAATAAACTCAG  
TAACAGTAGTGCTGTTGCGCCATGGCTCCTCCCACCTCTGCTGGGGATGGTCATGGACCC  
TGCTGAGCATCAGAGCCTGTGAGCTCTGAGGACAACACAAAGCTGTGTGTATATGTCTG  
GGTGAGTGCAGGTGTGTGATGTGAGTGCAGATGCCCTCAGTAACCAGCAGTACTGGATC  
CCCTGGAGCTGAAGTTGCCCGACACGGAGGCTGGGAGTTGAAGTCGGTCTCTGCTGGA  
GCAGTATGTGCTCCTAGCTTCTTAACCATCTCTTCATTCCCAGTCTGTGAAGATTTTGA  
TGCAGGGCTGAGAGGTAGCTCAGCGGCACACCCCTTGTCTGGTGTGCGTGAGGCTGGTT  
TCAAACACCCCAGTTCTGTTTTCTTTCTCTGTTGCGTTTTCTATCGTTATTTAATAT  
GCTGCTCGTGATCTTCCAGTCCCAGTGTGCCACAGAAGACTCTGGGGTACAGCAATCA  
GGGTAGACCCT

>5 OSNs\_0lfr49

GCATGGCAAAGTTGCGGAGGAAGTAATACATGGGGGTGTAAAGGCGCCTGTCCACAAGG  
GTGATGAAGATGATGAGGAAGTTTCCCAGCAGAATGAGGAAGTAGGTGAGGAGAAAGCC  
CAGGAATATGAGCACCTGCAGCTCACAGGCATCTGACAGCCCCAGCAAAATAAACTCAG  
TAACAGTAGTGCTGTTGCGCCATGGCTCCTCCCACCTCTGCTGGGGATGGTCATGGACCC

TGCTGAGCATCAGAGCCTGTGAGCTCTGAGGACAACACAAAGCTTAAGGTCTACCGTAT  
GTTCTGCAGATCACAATCAGGCAGCTCTTGTCCCATTACACTTCACTAAACCTTCAGTT  
TTTCCAGCGACCCACCTCCCTTGCAATACTCCCTCCCTCGGTCCTCTCAGAAGTGAGTT  
GTCTCTGGGTACTTACTAGAATTGGGATTACCAACTCATTGACTGCTAGGGCTCCTAAC  
CCCAAGTGTAC

>6 OSNs\_Olfr49

GCATGGCAAAGTTGCGGAGGAAGTAATACATGGGGGTGTAAAGGCGCCTGTCCACAAGG  
GTGATGAAGATGATGAGGAAGTTTCCCAGCAGAATGAGGAAGTAGGTCAGGAGAAAGCC  
CAGGAATATGAGCACCTGCAGCTCACAGGCATCTGACAGCCCCAGCAAAATAAACTCAG  
TAACAGTAGTGCTGTTTCGCCATGGCTCCTCCCACCTCTGCTGGGGATGGTCATGGACCC  
TGCTGAGCATCAGAGCCTGTGAGCTCTGAGGACAACACAAAGCTGTGTGTATATGTCTG  
GGTGAGTGCAGGTGTGTGATGTGAGTGCAGATGCCCTCAGTAACCAGCAGTACTGGATC  
CCCTGGAGCTGAAGTTGCCCGACACGGAGGCTGGGAGTTGAAGTCGGTCCTCTGCTGGA  
GCAGTATGTGCTCCTAGCTTCTTAACCATCTCTTCATTCCCAGTATGCTGCTCGTGATC  
TTCCAGTCCCCTGTGCCACAGAAGACTCTGGGGTACAGCAATCAGGGTAGACCCTTT  
GTTTCTC

>7 OSNs\_Olfr49

GCATGGCAAAGTTGCGGAGGAAGTAATACATGGGGGTGTAAAGGCGCCTGTCCACAAGG  
GTGATGAAGATGATGAGGAAGTTTCCCAGCAGAATGAGGAAGTAGGTCAGGAGAAAGCC  
CAGGAATATGAGCACCTGCAGCTCACAGGCATCTGACAGCCCCAGCAAAATAAACTCAG  
TAACAGTAGTGCTGTTTCGCCATGGCTCCTCCCACCTCTGCTGGGGATGGTCATGGACCC  
TGCTGAGCATCAGAGCCTGTGAGCTCTGAGGACAACACAAAGCTGTGTGTATATGTCTG  
GGTGAGTGCAGGTGTGTGATGTGAGTGCAGATGCCCTCAGTAACCAGCAGTACTGGATC  
CCCTGGAGCTGAAGTTGCCCGACACGGAGGCTGGGAGTTGAAGTCGGTCCTCTGCTGGA  
GCAGTATGTGCTCCTAGCTTCTTAACCATCTCTTCATTCCCAGTCTTAAGGTCTACCGT  
ATGTTCTGCAGATCACAATCAGGCAGCTCTTGTCCCATTACACTTCACTAAACCTTCAG  
TTTTTCCCAGCACCCACCTCCCTTGCAATACTCCCTCCCTCGGTCCTCTCAGAAGTGAG  
TTGTCTCTGGGTACTTACTAGAATTGGGATTACCAACTCATTGACTGCTAGGGCTCCTA  
ACCCAAGTGTAC

>8 OSNs\_Olfr49

CAGTAACCAGTAGTGCTGTTTCGCCATGGCTCCTTCCNNCCTTTNGCTGGGGATGGTCA  
TGGACCCTGCTGAGCATCAGAGCCTGTGAGCTCTGAGGACAACACAAAAGCTGTGTGTA  
TATGTCTGGGTGAGTGCAGGTGTGTGATGTGAGTGCAGATGCCCTCAGTAACCAGCAGT  
ACTGGATCCCCTGGAGCTGAAGTTGCCCGACACGGAGGCTGGGAGTTGAAGTCGGTCCT  
CTGCTGGAGCAGTATGTGCTCCTAGCTTCTTAACCATCTCTTCATTCCCAGTCTGTGAA  
GATTTTGATGCAGGGCTGAGAGGTAGCTCAGCGGCACACCCTTGTCTGGTGTGCGTGA  
GGCTGGTTTCAAACACCACAGTTCTGTTTTCTTTCTCTGTTGCGTTTTCTATCGTTA  
TTAATCTACATATTGGTTTATACAGATTATGCATTTTACCCTTCTTCTTTAAGATAG  
TAATAAAATAAAATGACATTATTATAAACTTTTTGTAATTATTTGGCTACTATTTTTGA  
AGACTTCAGGTACACGAACTGATACATAGATAAGAAAGCATGCATTTTTATCATGTTT  
AGTTTTTGTATAACATCCTCAATAATCAACACAAATAACCACTCAGAGTCATCCATGGA  
TTCAATCTCAATTGTTTCAGATTATGTTTTTACCCTAAGGTCTACCGTATGTTCTGCAGA  
TCACAATCAGGCAGCTCTTGTCCCATTACACTTCACTAAACCTTCAGTTTTTCCAGCGA  
CCCACCTCCCTTGCAATACTCCCTCCCTCGGTCCTCTCAGAAGTGAGTTGTCTCTGGGT  
ACTTACTAGAATTGGGATTACCAACTCATTGACTGCTAGGGCTCCTAACCCAAGTGTG  
ACAGTTGGGACCCTTGCCCTGAGAAAGTTAAATATACGTCTATAGTTCTGTAGTAGAGA  
GACAGACATCAATGGATGACTTGTGTGACTGGCTCTTACATGCTGCTCGTGATCTTCCA

GTCCCACTGTGCCACAGAAGACTCTGGGGTACAGCAATCAGGGTAGACCCTTTGTTTC  
TC

>9 OSNs\_Olfr49

GCATGGCAAAGTTGCGGAGGAAGTAATACATGGGGGTGTAAAGGCGCCTGTCCACAAGG  
GTGATGAAGATGATGAGGAAGTTTCCCAGCAGAATGAGGAAGTAGGTCAGGAGAAAGCC  
CAGGAATATGAGCACCTGCAGCTCACAGGCATCTGACAGCCCCAGCAAAATAAACTCAG  
TAACAGTAGTGCTGTTTCGCCATGGCTCCTCCCACCTCTGCTGGGGATGGTCATGGACCC  
TGCTGAGCATCAGAGCCTGTGAGCTCTGAGGACAACACAAAGCTTAAGGTCTACCGTAT  
GTTCTGCAGATCACAATCAGGCAGCTCTTGTCCCATTACACTTCACTAAACCTTCAGTT  
TTTCCAGCGACCCACCTCCCTTGCAATACTCCCTCCCTCGGTCCTCTCAGAAGTGAGTT  
GTCTCTGGGTACTIONTACTAGAATTGGGATTACCAACTCATTGACTGCTAGGGCTCCTAAC  
CCCAAGTGTACC

>10 OSNs\_Olfr49

GGCCGCGGGAATTCGATTGCATGGCAAAGTTGCGGAGGAAGTAATACATGGGGGTGTAA  
AGGCGCCTGTCCACAAGGGTGATGAAGATGATGAGGAAGTTTCCCAGCAGAATGAGGAA  
GTAGGTCAGGAGAAAGCCAGGAATATGAGCACCTGCAGCTCACAGGCATCTGACAGCC  
CCAGCAAAATAAACTCAGTAACAGTAGTGCTGTTTCGCCATGGCTCCTCCCACCTCTGCT  
GGGGATGGTCATGGACCCCTGCTGAGCATCAGAGCCTGTGAGCTCTGAGGACAACACAAA  
GCTGGAAATACAGAGGAATGAGTATTACACTTTCAGCTGGCGGAGTCCTTTAGAGGTTT  
CATCTCCTTAGCGTCCTGTTTCATCAGGCTGGTGAGTAAGATGTCTGGCTGAGTCAACAG  
CATATCATAAACGTTGACATCACTTTACAAAATTCGGGGTAATTCTCTACCCCAACTGA  
TTTTAAACAACCTTGTATGTGACCTATTTTTTTCTGCTAGGATTTTTTTATTATTATTT  
TAGATCAG

>11 OSNs\_Olfr49

AGGAATNTGAGNNCCTGCAGNNCNCAGGCATCTGACAGCCCCAGCAAAATAANNTCAGT  
ANCAGTAGTGCTGTTTCGCCATGGCTCCTCCCACCTNTGCTGGGGATGGTCATGGACCCCT  
GCTGAGCATCAGAGCCTGTGAGCTCTGAGGACAACACAAAGCTGTGTGTATATGTCTGG  
GTGAGTGCAGGTGTGTGATGTGAGTGCAGATGCCCTCAGTAACCAGCAGTACTGGATCC  
CCTGGAGCTGAAGTTGCCCGACACGGAGGCTGGGAGTTGAAGTCGGTCCTCTGCTGGAG  
CAGTATGTGCTCCTAGCTTCTTAACCATCTCTTCATCCCCAGTCTGTGAAGATTNTGAT  
GCAGGGCTGAGAGGTAGCTCAGCGGCACACCCCTTGTCTGGTGTGCGTGAGGCTGGTTT  
CAAACACCACAGTTCTGTTTTCTCTTTCTCTGTTGCGTTTTCTATCGTTATTTAATCTA  
CATATTGGTTTATACAGATTATGCATTTTACCCTTCTTCTTTTAAAGATAGTAATAAAAT  
AAAATGACATTATTATAAACTTTTTGTAATTATTTGGCTACTATTTTTGAAGACTTCAG  
GTACACGAAACTGATACATAGATAAGAAAGCATGTATTTTTATCATGTTTAGCTTTTGT  
ATAACATCCTCAATAATCAACACAAATAACCACTCAGAGTCATCCATGGATTCAATCTC  
AATTGTTTCAGATTATGTTTTTACCTTAAGGTCTACCGTATGTTCTGCAGATCACAATCA  
GGCAGCTCTTGTCCATTACACTTCACTAAACCTTCAGTTTTTCCAGCGACCCACCTCC  
CTTGCAATACTCCCTCCCTCGGTCCTCTCAGAAGTGAGTTGTCTCTGGGTACTIONTACTAG  
AATTGGGATTACCAACTCATTGACTGCTAGGGCTCCTAACCCCAAGTGTACAGTTGGG  
ACCCTTGCCTGAGAAAGTTAAATATAACATCTATAGTTCCTGTAGTAGAGAGACAGACAT  
CAATGGATGACTTGTGTC

>1 WOM\_Olfr266

GAAGAGCATGGTTGCACAGCACTAGAAAAACAATAAGGATGTTTCCAGAAATGGTTAGG  
ATGTAGAAGATGCAAAACATTATAAAGAGGGAAATATTCAGCTGTAAGATGGAAGAGAA



TCCTCGAAGAACAAACTCCACTATCACCGTTTGATTTTCCCAGGATAAGGTCATCATACTTTGGTTTCCTGGATTTAAATAATC

>2 WOM\_Olfr266

TGTGAAGAGCATGGTTGCACAGCACTAGAAAAACAATAAGGATGTTTCCAGAAATGGTTAGGATGTAGAAGATGCAAAACATTATAAAGAGGGAAATATTCAGCTGTAAGATGGAAGA  
GAATCCTCGAAGAACAAACTCCACTATCACCGTTTGATTTTCCCAGGATAAGGTCATCA  
TACTTTGGTTTTTCAGGGTTGCTTCATACCCTGGATATAGCACAGAGAATCCCTGGATTT  
AAATAATAACATTAGATGTGTGGAATCTTGCTTTTATCCAC

>3 WOM\_Olfr266

TGTGAAGAGCATGGTTGCACAGCACTAGAAAAACAATAAGGATGTTTCCAGAAATGGTTAGGATGTAGAAGATGCAAAACATTATAAAGAGGGAAATATTCAGCTGTAAGATGGAGGAGGAGTCCCTCGAAGAACAAACTCCACTATCACCGTTTGATTTTCCCAGGATAAGGTCATCA  
TACTTTGGTTTTTCAGGGTTGCTTCATACCCTGGATATAGCACAGAGAAT

>4 WOM\_Olfr266

TGTGAAGAGCATGGTTGCACAGCACTAGAAAAACAATAAGGATGTTTCCAGAAATGGTTAGGATGTAGAAGATGCAAAACATTATAAAGAGGGAAATATTCAGCTGTAAGATGGAAGA  
GAATCCTCGAAGAACAAACTCCACTATCACCGTTTGATTTTCCCAGGATAAGGTTATCA  
TACTTTGGTTTTTCAGGGTTGCTTCATACCCTGGATATAGCACAGAGAAT

>5 WOM\_Olfr266

TGTGAAGAGCATGGTTGCACAGCACTAGAAAAACAATAAGGATGTTTCCAGAAATGGTTAGGATGTAGAAGATGCAAAACATTATAAAGAGGGAAATATTCAGCTGTAAGATGGAAGA  
GAATCCTCGAAGAACAAACTCCACTATCACCGTTTGATTTTCCCAGGATAAGGTCATCA  
TACTTTGGTTTTTCAGGGTTGCTTCATACCCTGGATATAGCA

>6 WOM\_Olfr266

TGTGAAGAGCATGGTTGCACAGCACTAGAAAAACAATAAGGATGTTTCCAGAAATGGTTAGGATGTAGAAGATGCAAAACATTATAAAGAGGGAAATATTCAGCTGTAAGATGGAAGA  
GAATCCTCGAAGAACAAACTCCACTATCACCGTTTGATTTTCCCAGGATAAGGTCATCA  
TACTTTGGTTTTTCAGGGTTGCTTCATACCCTGGATATAGCACAGAGAAT

>1 OSNs\_Olfr266

TGTGAAGAGCATGGTTGCACAGCACTAGAAAAACAATAAGGATGTTTCCAGAAATGGTTAGGATGTAGAAGATGCAAAACATTATAAAGAGGGAAATATTCAGCTGTAAGATGGAAGA  
GAATCCTCGAAGAACAAACTCCACTATCACCGTTTGATTTTCCCAGGATAAGGTCATCA  
TACTTTGGTTTTTCAGGGTTGCTTCATACCCTGGATATAGCACAGAGAATCCAGAACAGATCCGCTTTGCCCATCAGAGACTTGAGAGAGGTCCATTCCCTAATTTGCAGAGCCAGACCAC  
ATAGAATC

>2 OSNs\_Olfr266

TGTGAAGAGCATGGTTGCACAGCACTAGAAAAACAATAAGGATGTTTCCAGAAATGGTTAGGATGTAGAAGATGCAAAACATTATAAAGAGGGAAATATTCAGCTGTAAGATGGAAGA  
GAATCCTCGAAGAACAAACTCCACTATCACCGTTTGATTTTCCCAGGATAAGGTCATCA  
TACTTTGGTTTTCTGTGAAGGACACGATTATAAAGCATAACATAATATAGCTGTTTCTAC  
TTTATGCAAGAATGTGAACAGAATGGTTTTTATTCTATGCTCTCTCTACT

>3 OSNs\_Olfr266

AAATAAGGATGTTTCCAGAAATGGTTAGGATGTAGAAGATGCAAAACATTATAAAGAGGG  
AAATATTCAGCTGTAAGATGGAAGAGAATCCTCGAAGAACAAACTCCACTATCACCGTT  
TGATTTTCCCAGGATAAGGTCATCATACTTTGGTTTTTCTTTCCCTCTACCAAGTGATT

GCCCCACTTACTCAGGGTTGCTTCATACCCTGGATATAGCACAGAGAATCCCTGGATTT  
AAATAATAACATTAGATGTGTGGAATCTTGCTTTTTATCCC

>4 OSNs\_Olfr266

TGTGAAGAGCATGGTTGCACAGCACTAGAAAAACAATAAGGATGTTTCCAGAAATGGTT  
AGGATGTAGAAGATGCAAAACATTATAAAGAGGGAAATATTCAGCTGTAAGATGGAAGA  
GAATCCTCGAAGAACAACCTCCACTATCACCGTTTGATTTTCCCAGGATAAGGTCATCA  
TACTTTGGTTTTCTGTGAAGGACACGATTATAAAGCATAACATAATATAGCTGTTTCTAC  
TTTATGCAAGAATGTGAACAGAATGGTTTTTTATTCTATGCTCTCTCTAC

>5 OSNs\_Olfr266

TGTGAAGAGCATGGTTGCACAGCACTAGAAAAACAATAAGGATGTTTCCAGAAATGGTT  
AGGATGTAGAAGATGCAAAACATTATAAAGAGGGAAATATTCAGCTGTAAGATGGAAGA  
GAATCCTCGAAGAACAACCTCCACTATCACCGTTTGATTTTCCCAGGATAAGGTCATCA  
TACTTTGGTTTTCTGTGAAGGACACGATTATAAAGCATAACATAATATAGCTGTTTCTAC  
TTTATGCAAGAATGTGAACAGAATGGTTTTTTATTCTATGCTCTCTCTAC

>6 OSNs\_Olfr266

TGTGAAGAGCATGGTTGCACAGCACTAGAAAAACAATAAGGATGTTTCCAGAAATGGTT  
AGGATGTAGAAGATGCAAAACATTATAAAGAGGGAAATATTCAGCTGTAAGATGGAAGA  
GAATCCTCGAAGAACAACCTCCACTATCACCGTTTGATTTTCCCAGGATAAGGTCATCA  
TACTTTGGTTTTCTAACCAGAAAGCTC

>7 OSNs\_Olfr266

TGTGAAGAGCATGGTTGCACAGCACTAGAAAAACAATAAGGATGTTTCCAGAAATGGTT  
AGGATGTAGAAGATGCAAAACATTATAAAGAGGGAAATATTCAGCTGTAAGATGGAAGA  
GAATCCTCGAAGAACAACCTCCACTATCGCCGTTTGATTTTCCCAGGATAAGGTCATCA  
TACTTTGGTTTTTCCAGGGTTGCTTCATACCCTGGATATAGCACAGAGAATCCCTGGATTT  
AAATAATC

>8 OSNs\_Olfr266

TGTGAAGAGCATGGTTGCACAGCACTAGAAAAACAATAAGGATGTTTCCAGAAATGGTT  
AGGATGTAGAAGATGTAAAACATTATAAAGAGGGAAATATTCAGCTGTAAGATGGAAGA  
GAATCCTCGAAGAACAACCTCCACTATCACCGTTTGATTTTCCCAGGATAAGGTCATCA  
TACTTTGGTTTTCTGTGAAGGACACGATTATAAAGCATAACATAATATAGCTGTTTCTAC  
TTTATGCAAGAATGTGAACAGAATGGTTTTTTATTCTATGCTCTCTCTACT

>9 OSNs\_Olfr266

TGTGAAGAGCATGGTTGCACAGCACTAGAAAAACAATAAGGATGTTTCCAGAAATGGTT  
AGGATGTAGAAGATGCAAAACATTATAAAGAGGGAAATATTCAGCTGTAAGATGGAAGA  
GAATCCTCGAAGAACAACCTCCACTATCACCGTTTGATTTTCCCAGGATAAGGTCATCA  
TACTTTGGTTTTCTGTGAAGGACACGATTATAAAGCATAACATAATATAGCTGTTTCTAC  
TTTATGCAAGAATGTGAACAGAATGGTTTTTTATTCTATGCTCTCTCTACT

>1 WOM\_Olfr267

CGTGAATCCAGGACAGTGATTAAGATAAGAGTACAGTTACCCAGGATGGTAACCAGATA  
CATGACAAGGCTGAAGACAAACCGAACAATCTCTAACCTC

>2 WOM\_Olfr267

TTTGAAGGCGTGAATCCAGGACAGTGATTAAGATAAGAGTACAGTTACCCAGGATGGTA  
ACCAGATACATGACAAGGCTGAAGACAAACAGAACAATCTCTAACCTCGGGTACCGGGA  
AAATCCCTCTAGGAAAAAAGGCTCCAAACAGTGACATTTTCTCCTGGCATTTCCTCAC  
GAGCACCACCAGCACCAACAGCTATTCTAGAGAGATTCTCTTCATTTTCATATTGCTCAT  
TACCACTGTCAAACCTTTTCTTT

>3 WOM\_Olfr267

TTTGAAGGCGTGAATCCAGGACAGTGATTAAGATAAGAGTACAGTTACCCAGGATGGTA  
ACCAGATACATGACAAGGCTGAAGACAAACAGAACAATCTCTAACCTC

>4 WOM\_Olfr267

TTTGAAGGCGTGAATCCAGGACAGTGATTAAGATAAGAGTACAGTTACCCAGGATGGTA  
ACCAGATACATGACAAGGCTGAAGACAAACAGAACAATCTCTAACCTCGGGTACCGGGA  
AAATCCCTCTAGGAAAAAAAGGCTCCAAACAGTGACATTTTCTCCTGGCATTTCCTCAC  
GAGCACCACCAGCACCAACAGCTATTCTAGAGAGATTCTCTTCATTTTCATATTGCTCAT  
TACCACTGTCAAACCTTTTCTTTCCCTTCTGATTCTCTCCAGACTTTCTTCAAACACAT  
ATGCTCTCAAATATTCCCTTCCACTGGCATCCTGCCATGTTGCCACTGTCTCTGCTTGCT  
TTCTTAGAAAGATCCACCGGTCAGATGGTCCATGTCACAGTACTTCAGCCTTTGTTTCT  
GTTTCTTGCTTCCAACCAGTCAGTCTTCTCCACATTCTCTGAATCCCATGCTATAAACT  
CCAAATAAAAATGTTTTATGATATGTTCCACAAGTTAGTTATGGTTGGTTATATGTAAA  
GAAGAATGAATATATCTACATTTAAAATCTGAAATGCTATAGAAAAATCAATTATGCAA  
TGCATTTCTTTCAAATGACCAGATGTTACAAACATAACCAAATTC

>5 WOM\_Olfr267

TTTGAAGGCGTGAATCCAGGACAGTGATTAAGATAAGAGTACAGTTACCCAGGATGGTA  
ACCAGATACATGACAAGGCTGAAGACAAACAGAACAATCTCTAACCTCGGGTACCGGGA  
AAATCCCTCTAGGAAAAAAAGGCTCCAAACAGTGACATTTTCTCCTGGCATTTCCTCAC  
GAGCACCACCAGCACCAACAGCTATTCTAGAGAGATTCTCTTCATTTTCATATTGCTCAT  
TACCACTGTCAAACCTTTTCTTTCCCTTCTGATTCTCTCCAGACTTTCTTCAAACACAT  
ATGCTCTCAAATATTCCCTTCCACTGGCATCCTGCCATGTTGCCACTGTCTCTGCTTGCT  
TTCTTAGAAAGATCCACCGGTCAGATGGTCCATGTCACAGTACTTCAGCCTTTGTTTCT  
GTT

>6 WOM\_Olfr267

TTTGAAGGCGTGAATCCAGGACAGTGATTAAGATAAGAGTACAGTTACCCAGGATGGTA  
ACCAGATACATGACAAGGCTGAAGACAAACAGAACAATCTCTAACCTCGGGTACCGGGA  
AAATCCCTCTAGGAAAAAAAGGCTCCAAACAGTGACATTTTCTCCTGGCATTTCCTCAC  
GAGCACCACCAGCACCAACAGCTATTCTAGAGAGATTCTCTTCATTTTCATATTGCTCAT  
TACCACTGTCAAACCTTTTCTTT

>7 WOM\_Olfr267

TTTGAAGGCGTGAATCCAGGACAGTGATTAAGATAAGAGTACAGTTACCCAGGATGGTA  
ACCAGATACATGACAAGGCTGAAGACAAACAGAACAATCTCTAACCTC

>8 WOM\_Olfr267

TTTGAAGGCGTGAATCCAGGACAGTGATTAAGATAAGAGTACAGTTACCCAGGATGGTA  
ACCAGATACATGACAAGGCTGAAGACAAACAGAACAATCTCTAACCTCGGGTACCGGGA  
AAATCCCTCTAGGAAAAAAAGGCTCCAAACAGTGACATTTTCTCCTGGCATTTCCTCA  
CGAGCACCACCAGCACCAACAGCTATTCTAGAGAGATTCTCTTCATTTTCATATTGCTCA  
TTACCACTGTCAAACCTTTTCTTTCCCTTCTGATTCTCTCCAGACTTTCTTCAAACACA  
TATGCTCTCAAATATTCCCTTCCACTGGCATCCTGCCATGTTGCCACTGTCTCTGCTTGCT  
TTTCTTAGAAAGATCCACCGGTCAGATGGTCCGTGTCACAGTACTTCAGCCTTTGTTTCT  
TGTTTCTTGCTTCCAACCAGTCAGTCTTCTCCACATTCTCTGCCTGAATCCCATGCTAT  
AAACTCCAAATAAAAATGTTTTATGATATGTTCCACAAGTTAGTTATGGTT

>9 WOM\_Olfr267

TTTGAAGGCGTGAATCCAGGACAGTGATTAAGATAAGAGTACAGTTACCCAGGATGGTA  
ACCAGATACATGACAAGGCTGAAGACAAACAGAACAATCTCTAACCTCGGGTACCGGGA  
AAATCCCTCTAGGAAAAAAAGGCTCCAAACAGTGACATTTTCTCCTGGCATTTCCTCAC

GAGCACCACCAGCACCAACAGCTATTCTAGAGAGATTCTCTTCATTTTCATATTGCTCAT  
TACCACTGTCAAACCTTTTCTTT

>1 OSNs\_Olfr267

TTGAAGGCGTGAATCCAGGACAGTGATTAAGATAAGAGTACAGTTACCCAGGATGGTAA  
CCAGATACATGACAAGGCTGAAGACAAACAGAACAATCTCTAACCTCGGGTACCGGGAA  
AATCCCTCTAGGAAAAAAGGCTCCAAACAGTGACATTTTCTCCTGGCATTTCCTCACG  
AGCACCACCAGCACCAACAGCTATTCTAGAGAGATTCTCTTCATTTTCATATTGCTCATT  
ACCACTGTCAAACCTTTTCTTTCCCTTCT

>2 OSNs\_Olfr267

GGCCGCGGGAATTCGATTTTTGAAGGCGTGAATCCAGGACAGTGATTAAGATAAGAGTA  
CAGTTACCCAGGATGGTAACCAGATACATGACAAGGCTGAAGACAAACAGAACAATCTC  
TAACCTCGGGTACCGGGAAAATCCCTCTAGGAAAAAAGGCTCCAAACAGTGACATTTT  
CTCCTGGCATTTCCTCACGAGCACCACCAGCACCAACAGCTATTCTAGAGAGATTCTCT  
TCATTTTCATCTGAGGAGTATAAATACATATAATGTCCATTATGCTA

>3 OSNs\_Olfr267

GGCCGCGGGAATTCGATTTTTGAAGGCGTGAATCCAGGACAGTGATTAAGATAAGAGTA  
CAGTTACCCAGGATGGTAACCAGATACATGACAAGGCTGAAGACAAACAGAACAATCTC  
TAACCTCGGGTACCGGGAAAATCCCTCTAGGAAAAAAGGCTCCAAACAGTGACATTTT  
CTCCTGGCATTTCCTCACGAGCACCACCAGCACCAACAGCTATTCTAGAGAGATTCTCT  
TCATTTTCATCTGAGGAGTATAAATACATATAATGTCCATTATGCTA

>4 OSNs\_Olfr267

TTTGAAGGCGTGAATCCAGGACAGTGATTAAGATAAGAGTACAGTTACCCAGGATGGTA  
ACCAGATACATGACAAGGCTGAAGACAAACAGAACAATCTCTAACCTCGGGTACCGGGA  
A

>5 OSNs\_Olfr267

GGCCGCGGGAATTCGATTTTTGAAGGCGTGAATCCAGGACAGTGATTAAGATAAGAGTAC  
AGTTACCCAGGATGGTAACCAGATACATGACAAGGCTGAAGACAAACAGAACAATCTCT  
AACCTCGGGTACCGGGAAAATCCCTCTAGGAAAAAAGGCTCCAAACAGTGACATTTTC  
TCCTGGCATTTCCTCACGAGCACCACCAGCACCAACAGCTATTCTAGAGAGATTCTCT  
CATTTTCGTCTGAGGAGTATAAATACATATAATGTCCATTATGCTA

>6 OSNs\_Olfr267

GGCCGCGGGAATTCGATTTTTGAAGGCGTGAATCCAGGACAGTGACTAAGATAAGAGTA  
CAGTTACCCAGGATGGTAACCAGATACATGACAAGGCTGAAGACAAACAGAACAATCTC  
TAACCTCGGGTACCGGGAAAATCCCTCTAGGAAAAAAGGCTCCAAACAGTGACATTTT  
CTCCTGGCATTTCCTCACGAGCACCACCAGCACCAACAGCTATTCTAGAG

>7 OSNs\_Olfr267

GGCCGCGGGAATTCGATTTTTGAAGGCGTGAATCCAGGACAGTGATTAAGATAAGAGTA  
CAGTTACCCAGGATGGTAACCAGATACATGACAAGGCTGAAGACAAACAGAACAATCTC  
TAACCTCGGGTACCGGGAAAATCCCTCTAGGAAAAAAGGCTCCAAACAGTGACATTTT  
CTCCTGGCATTTCCTCACGAGCACCACCAGCACCAACAGCTATTCTAGAGAGATTCTCT  
TCATTTTCATCTGAGGAGTATAAATACATATAATGTCCATTATGCTAGAA

>8 OSNs\_Olfr267

GGCCGCGGAATTCGATTGCGTGAATGACAGTGATTAAGATAAGAGTACAGTACCCAGGA  
TGTAACCAGATACATGACAAGGCTGAAGACAAACAGAACAATCTCTAACCTCGGGTAC  
CGGGAAAATCCCTCTAGGAAAAAAGGCTCCAAACAGACATTTTCTCTGGCATTTCCTC

ACGAGCACCACCAGCACCAACAGCTATTCTAGAGAGATTCTCTTCATTTTCATCTGAGGA  
GTATAAATACATATAATGTCCATTATGCTA

>9 OSNs\_Olfr267

GGCCGCGGGAATTCGATTTTTGAAGGCGTGAATCCAGGACAGTGATTAAGATAAGAGTA  
CAGTTACCCAGGATGGTAACCAGATACATGACAAGGCTGAAGACAAACAGAACAATCTC  
TAACCTCGGGTACCGGGAAAATCCCTCTAGGAAAAAAGGCTCCAAACAGTGACATTTT  
CTCCTGGCATTTCCTCACGAGCACCACCAGCACCAACAGCTATTCTAGAG

>1 WOM\_Olfr370

GTACGGCTGTCAATCTCCTGTGCTTCTCGAGTGTGTAAGGATTTCCCTCAGTGCCCTCTC  
CCCATCTGGGGCTGATCTCTGATGACAGAGCCTCCATGGAGTGTGTAAATGACACTGTG  
GTCAGAGAATTTGTCTTCCCTTGGCTTCTCGTCTCTGGCTG

>2 WOM\_Olfr370

GTACGGCTGTCAATCTCCTGTGCTTCTCGAGTGTGTAAGGATTTCCCTCAGTGCCCTCTC  
CCCATCTGGGGCTGATCTCTGATGACAGAGCCTCCATGGAGTGTGTAAATGACACTGTG  
GTCAGAGAATTTGTCTTCCCTTGGCTTCTCGTCTCTGGCTG

>3 WOM\_Olfr370

ACTTGAGCGTCGATTTTTGTGATGCTCGTCAGGGGGGCGGAGCCTATGGAAAACGCCA  
GCAACGCGGCCTTTTTACGGTTCCTGGCCTTNTGCTGGCCTTTTGCTCACATGTTCTNT  
CCTGCGTTATCCCCTGATTTCTGTGGATAACCGTATTACCGCCTTTGAGTGAGCTGATAC  
CGCTCGCCGCAGCCGAACGACCGAGCGCAGCGAGTCAGTGAGCGAGGAAGCGGAAGAGC  
GCCAATACGCAAACCGCCTCTCCCCGCGCGTTGGCCGATTTCATTAATGCAGCTGGCAC  
GACAGGTTTCCCGACTGGAAAGCGGGCAGTGAGCGCAACGCAATTAATGTGAGTTAGCT  
CACTCATTAGGCACCCAGGCTTTACACTTTATGCTTCCGGCTCGTATGTTGTGTGGAA  
TTGTGAGCGGATAACAATTTACACACAGGAAACAGCTATGACCATGATTACGCCAAGCTA  
TTTAGGTGACACTATAGAATACTCAAGCTATGCATCCAACGCGTTGGGAGCTCTCCCAT  
ATGGTGCACCTGCAGGCGGCCGGAATTCAGTAGTGATTAAGCAGTGGTATCAACGCAG  
AGTACATGCTGTACGGCTGTCAATCTCCTGTGCTTCTCGAGTGTGTAAGGATTTCCCTCA  
GTGCCCTCTCCCCATCTGGGGCTGATCTCTGATGACAGAGCCTCCATGGAGTGTGTAA  
TGACACTGTGGTCAGAGAATTTGTCTTCCCTTGGCTTCTCGTCTCTGGCTG

>4 WOM\_Olfr370

GGTTTCAGTCTGGGTCTCAGACCCCAGACTATGATTCCATACCTCCCTGAGTAGACAGC  
AGCAAACCTTTAACTCACCTCGTACTTCCCTCTTCTTAGCAGTCTATGTGACTTCAGTC  
CTGGTGCCTCTGTGTCACTGGGCTTTCTCAGGAACAGAAAAGAAGGAAGAGAAGCTCGT  
CCATGGACAGCTGACATCTTCCCTCAGCTGACACCACTAACACTGGGGAATAAGATTAA  
GCATCTACCTCCAACAACACATAGGTTTTTCATATCTCAGGAAGGAGGAGAAATGGCAAG  
TTTAGCAGGAGGGTCTGGGAGCACATGCTGTACGGCTGTCAATCTCCTGTGCTTCTCGA  
GTGTGTAAGGATTTCCCTCAGTGCCCTCCCCCATCTGGGGCTGATCTCTGATGACAGAG  
CCTCCATGGAGTGTGTAAATGACACTGTGGTCAGAGAATTTGTCTTCCCTTGGCTTCTCG  
TCTCTGGCTG

>5 WOM\_Olfr370

AAACAAGCAGAGACACGAAGCACAGCGGTCCTCTTTCCTGTCCTGTGGGATACACACT  
TCAGAAGAGCATGGAAGGAGGAGAAATGGCAAGTTTAGCAGGAGGGTCTGGGAGCAT  
GCTGTACGGCTGTCAATCTCCTGTGCTTCTCGAGTGTGTAAGGATTTCCCTCAGTGCCCT  
CTCCCCATCTGGGGCTGATCTCTGATGACAGAGCCTCCATGGAGTGTGTAAATGACACT  
GTGGTCAGAGAATTTGTCTTCCCTTGGCTTCTCGTCTCTGGCTG

>6 WOM\_Olfr370

GTACGGCTGTCAATCTCCTGTGCTTCTCGAGTGTGTAAGGATTTCCCTCAGTGCCCTCTC  
CCCATCTGGGGCTGATCTCTGATGACAGAGCCTCCATGGAGTGTGTAAATGACACTGTG  
GTCAGAGAATTTGTCTTCCTTGGCTTCTCGTCTCTGGCTG

>7 WOM\_Olfr370

AAACAAGCAGAGACACGGAAGCACAGCGGTCTCTTTCCCTGTCCTGTGGGATACACACT  
TCAGAAGAGCATGAACTACTGCGGAGACAACGTCTGATGTACGACAGCTTGATCTGGAA  
TTCTCGTTTCTTGGACAAACAGGAAGGAGGAGAAATGGCAAGTTTAGCAGGAGGGTCTG  
GGAGCACATGCTGTACGGCTGTCAATCTCCTGTGCTTCTCGAGTGTGTAAGGATTTCCCT  
CAGTGCCCTCTCCCCATCTGGGGCTGATCTCTGATGACAGAGCCTCCATGGAGTGTGTA  
AATGACACTGTGGTCAGAGAATTTGTCTTCCTTGGCTTCTCGTCTCTGGCTG

>8 WOM\_Olfr370

GTACGGCTGTCAATCTCCTGTGCTTCTCGAGTGTGTAAGGATTTCCCTCAGTGCCCTCTC  
CCCATCTGGGGCTGATCTCTGATGACAGAGCCTCCATGGAGTGTGTAAATGACACTGTG  
GTCAGAGAATTTGTCTTCCTTGGCTTCTCGTCTCTGGCTG

>9 WOM\_Olfr370

TGGAGTGTGTAAATGACACTGTGGTCAGAGAATTCGTCTTCCTTGGCTTCTCGTCTCTG  
GCTG

>10 WOM\_Olfr370

GGTTTCAGTCTGGGTCTCAGACCCCAGACTATGATTCCATACCTCCCTGAGTAGACAGC  
AGCAAACCTTAACTCACCTCGTACTTCCCTCTTCTTAGCAGTCTATGTGACTTCAGTC  
CTGGTGCCCTCTGTGTCAATGGGCTTTCTCAGGAACAGAAAAGAAGGAAGAGGAGCTCGT  
CCATGGACAGCTGACATCTTCCTTCAGCTGACACCACTAACACTGGGGAATAAGATTAA  
GCATCTACCTCCAACAACACATAGGTTTTTCATATCTCAGGAAGGAGGAGAAATGGCAAG  
TTTAGCAGGAGGGTCTGGGAGCACATGCTGTATGGCTGTCAATCTCCTGTGCTTCTCGA  
GTGTGTAAGGATTTCCCTCAGTGCCCTCTCCCCATCTGGGGCTGATCTCTGATGACAGAG  
CCTCCATGGAGTGTGTAAATGACACTGTGGTCAGAGAATTTGTCTTCCTTGGCTTCTCG  
TCTCTGGCTG

>11 WOM\_Olfr370

GGTTTCAGTCTGGGTCTCAGACCCCAGACTATGATTCCATACCTCCCTGAGTAGACAGC  
AGCAAACCTTAACTCACCTCGTACTTCCCTCTTCTTAGCAGTCTATGTGACTTCAGTC  
CTGGTGCCCTCTGTGTCACTGGGCTTTCTCAGGAACAGAAAAGAAGGAAGAGGAGCTCGT  
CCATGGACAGCTGACATCTTCCTTCAGCTGACACCACTAACACTGGGGAATAAGATTAA  
GCATCTACCTCCAACAACACATAGGTTTTTCATATCTCAGAACTACTGCGGAGACAACGT  
CTGATGTACGACAGCTTGATCTGGAATTCTCGTTTCTTGGACAAACAGGAAGGAGGAGA  
AATGGCAAGTTTAGCAGGAGGGTCTGGGAGCACATGCTGTACGGCTGTCAATCTCCTGT  
GCTTCTCGAGTGTGTAAAGGATTTCCCTCAGTGCCCTCTCCCCATCTGGGGCTGATCTCTG  
ATGACAGAGCCTCCATGGAGTGTGTAAATGACACTGTGGTCAGAGAATTTGTCTTCCTT  
GGCTTCTCGTCTCTGGCTG

>1 OSNs\_Olfr370

GTTACCAGAACTACTGCGGAGACAACCTCTGATGTACGACAGCTTGATCTGCAATTCTC  
GTTTCTTGGACAAACAGGAAGGAGGAGAAATGGCAAGTTTAGCAGGAAGGTCTGGGAGC  
ACATGCTGTACGGCTGTCAAGTCTCCTGTGCTTCTCGAGCGTGTAAAGGATTTCCCTCAGTG  
CCCTCTCCCCATCTGGGGCTGATCTCTGATGACAGAGCCTCCATGGAGTGTGTAAATGA  
CACTGTGGTCAGAGAGTTTGTCTTCCTTGGCTTCTCGTCTCTGGCTG

>2 OSNs\_Olfr370

GTACGGCTGTCAGTCTCCTGTGCTTCTCGAGCGTGTAAGGATTCCTCAGTGCCCTCTC  
CCCATCTGGGGCTGATCTCTGATGACAGAGCCTCCATGGAGTGTGTAAATGACACTGTG  
GTCAGAGAGTTTGTCTTCCTTGGCTTCTCGTCTCTGGCTG

>3 OSNs\_Olfr370

GTACGGCTGTCAGTCTCCTGTGCTTCTCGAGCGTGTAAGGATTCCTCAGTGCCCTCTC  
CCCATCTGGGGCTGATCTCTGATGACAGAGCCTCCATGGAGTGTGTAAATGACACTGTG  
GTCAGAGAGTTTGTCTTCCTTGGCTTCTCGTCTCTGGCTGAATCGAATCCCGCGGCC

>4 OSNs\_Olfr370

CAGGAAGGTCTGGGAGCACATGCTGTACGGCTGTCAGTCTCCTGTGCTTCTCGAGCGTG  
TAAGGATTCCTCAGTGCCCTCTCCCCATCTGGGGCTGATCTCTGATGACAGAGCCTCC  
ATGGAGTGTGTAAATGACACTGTGGTCAGAGAGTTTGTCTTCCTTGGCTTCTCGTCTCT  
GGCTGAATCGAATCCCGCGGCC

>5 OSNs\_Olfr370

CAGGAAGGTCTGGGAGCACATGCTGTACGGCTGTCAGTCTCCTGTGCTTCTCGAGCGTG  
TAAGGATTCCTCAGTGCCCTCTCCCCATCTGGGGCTGATCTCTGATGACAGAGCCTCC  
ATGGAGTGTGTAAATGACACTGTGGTCAGAGAGTTTGTCTTCCTTGGCTTCTCGTCTCT  
GGCTGAATCGAATCCCGCGGCC

>6 OSNs\_Olfr370

CAGGAAGGTCTGGGAGCACATGCTGTACGGCTGTCAGTCTCCTGTGCTTCTCGAGCGTG  
TAAGGATTCCTCAGTGCCCTCTCCCCATCTGGGGCTGATCTCTGATGACAGAGCCTCC  
ATGGAGTGTGTAAATGACACTGTGGTCAGAGAGTTTGTCTTCCTTGGCTTCTCGTCTCT  
GGCTGAATCGAATCCCGCGGCC

>7 OSNs\_Olfr370

GTACGGCTGTCAGTCTCCTGTGCTTCTCGAGCGTGTAAGGATTCCTCAGTGCCCTCTC  
CCCATCTGGGGCTGATCTCTGATGACAGAGCCTCCATGGAGTGTGTAAATGACACTGTG  
GTCAGAGAGTTTGTCTTCCTTGGCTTCTCGTCTCTGGCTG

>8 OSNs\_Olfr370

GTGTAAATGACACTGTGGTCAGAGAATTTGTCTTCCTTGGCTTCTCGTCTCTGGCTG

>9 OSNs\_Olfr370

GTACGGCTGTCAGTCTCCTGTGCTTCTCGAGCGTGTAAGGATTCCTCAGTGCCCTCTC  
CCCATCTGGGGCTGATCTCTGATGACAGAGCCTCCATGGAGTGTGTAAATGACACTGTG  
GTCAGAGAGTTTGTCTTCCTTGGCTTCTCGTCTCTGGCTGAATCGAATCCCGCGGCC

>10 OSNs\_Olfr370

CAGGAGGTCTGGGCACATACGTCCTCCTGCTCGAGCGTGTAAGGATTCCTCAGCCCTC  
TCCCCATCTGGGGCGATCTCTGATGACAGAGCCTCCATGGTGTAAATGACACTGTCAGA  
GAGTTTGTCTTCCTTGGCTTCTCTTGGCTG

>11 OSNs\_Olfr370

GTACGGCTGTCAATCTCCTGTGCTTCTCGAGTGTGTAAAGGATTCCTCAGTGCCCTCTC  
CCCATCTGGGGCTGATCTCTGATGACAGAGCCTCCATGGAGTGTGTAAATGACACTGTG  
GTCAGAGAATTTGTCTTCCTTGGCTTCTCGTCTCTGGCTG

>12 OSNs\_Olfr370

GTACGGCTGTCAGTCTCCTGTGCTTCTCGAGCGTGTAAGGATTCCTCAGTGCCCTCTC  
CCCATCTGGGGCTGATCTCTGATGACAGAGCCTCCATGGAGTGTGTAAATGACACTGTG  
GTCAGAGAGTTTGTCTTCCTTGGCTTCTCGTCTCAATCGAATCCCGCGGCC

>13 OSNs\_Olfr370

GGGAGCACATGCTGTACGGCTGTCAATCTCCTGTGCTTCTCGAGTGTGTAAGGATTTCC  
TCAGTGCCCTCTCCCCATCTGGGGCTGATCTCTGATGACAGAGCCTCCATGGAGTGTGT  
AAATGACACTGTGGTCAGAGAATTTGTCTTCCTTGGCTCGTCAATCGAACCCGCGGCC

>14 OSNs\_Olfr370

GTACGGCTGTCAATCTCCTGTGCTTCTCGAGTGTGTAAGGATTTCCCTCAGTGCCCTCTC  
CCCATCTGGGGCTGATCTCTGATGACAGAGCCTCCATGGAGTGTGTAAATGACACTGTG  
GTCAGAGAATTTGTCTTCCTTGGCTCTCGTCTCGAATCGAATTCCC GCGGCC

>15 OSNs\_Olfr370

GCAGGAAGGTCTGGGAGCACATGCACGGGTGAGTCTCCTGTGCTTCTCGAGCGTGTAAG  
GATTTCCCTCAGTGCCCTCTCCCCATCTGGGGCTGATCTCTGATGACAGAGCCTCCATGG  
TGTAATGACACTGTGGTCAGAGAGTTTGTCTTCCTTGGCTTCTCGTCTCTGGCTG

>16 OSNs\_Olfr370

CCTTCCGGCTTTGAGGGTAAGGATTTCCCTCATGCCCTCTCCCCATGGGGATTGATGACA  
GAGCCTGGTAAACGTGGTCAGATTTTC

>17 OSNs\_Olfr370

CGGCTGTGCTGTGCTCTCGAGCGTGTAAGTTTCCCTCAGTGCCCCCATCTGGGGCTGA  
TCGATGAGAGCCAGTAAATGGTGGTTCGAGTTTGTCTTCCTTGGCTC

>18 OSNs\_Olfr370

GTACGGCTGTCAATCTCCTGTGCTTCTCGAGTGTGTAAGGATTTCCCTCAGTGCCCTCTC  
CCCATCTGGGGCTGATCTCTGATGACAGAGCCTCCATGGAGTGTGTAAATGACACTGTG  
GTCAGAGAATTTGTCTTCCTTGGCTTCTCGTCTCTGGCTG

>19 OSNs\_Olfr370

CAGTCTCCTGTGCTTCTCGAGCGTGTAAGGATTTCCCTCAGTGCCCTCTCCCCATCTGGG  
GCTGATCTCTGATGACAGAGCCTCCATGGAGTGTGTAAATGACACTGTGGTCAGAGAGT  
TTGTCTTCCTTGGCTTCTCGTCT

>1 WOM\_Olfr371

GACTAACCCAAGCATAACATGAAAAACAATCCCCCTGCTCCAGAGAACATTGCTGTGGT  
TCAGGAATCACTCTTTTACCTCGTCTCACTGACCCTGCTGACTCATTAGCTCCACCAGTC  
TCTTTTCTGAAAGACACTTCATTTACATGGAACCAGAAAACCACACAGGGATTCCAGAA  
TTTTACCTGTTGGGACTTTCAGAGAATCCAGAGATTCAGTCCGTTCTCTTTGGGCTGTT  
CTTG

>2 WOM\_Olfr371

GTCACTGACCCTGCTGACTCATTAGCTCCACCAGTCTCTTTTCTGAAAGACCTGAACCT  
CTCTCAGTCTTGGTGAGGAAAGCTTCTTTTGCAGTGGGCAGCAGTCAGTGAGGACTCA  
TGGCTGGTCAACATGCTGGGAATAACTGATTACACTTCATTTACATGGAACCAGAAAAC  
CACACAGGGATTCCAGAATTTTACCTGTTGGGGCTTTCAGAGAATCCAGAGACTCAGTC  
CGTTCTCTTTGGGCTGTTCTTG

>3 WOM\_Olfr371

GAACATTGCTGTGGTTTCAGGAATCACTCTTTTACCTCGTCTCACTGACCCTGCTGACTCA  
TTGGCTCCACCAGTCTCTTTTCTGAAAGACACTTCATTTACATGGAACCAGAAAACCAC  
ACAGGGATTCCAGAATTTTACCTGTTGGGACTTTCAGAGAATCCAGAGATTCAGTCCGT  
TCTCTTTGGGCTGTTCTTG

>4 WOM\_Olfr371

ACCAAATAAACAACACAGCTCCTGACATTGTCATTTACTAACCACAGCATAACATGAAAA  
AACAAATCCCCCTGCTCCAGAGAACATTGCTGTGGTTTCAGGAATCACTCTTTTACCTCGTC  
TCACTGACCCTGCTGACTCATTAGCTCCACCAGTCTCTTTTCTGAAAGACCTGAACCTC



TCTCAGTCTTGGTGAGGAAAGCTTCTTTTTGCAGTGGGCAGCAGTCAGTGAGGACTCAT  
GGCTGGTCAACATGCTGGGAATAACTGATTACACTTCATTTACATGGAACCAGAAAACC  
ACACAGGGATTCCAGAATTTTACCTGTTGGGACTTTCAGAGAATCCAGTGATTGAGTCC  
GTTCTCTTTGGGCTGTTCTTG

>5 WOM\_Olfr371

GAGAGAACATTGCTGTGGTTCAGGAATCACTCTTTACCTCGTCTCACTGACCCTGCTGA  
CTCATTAGCTCCACCAGTCTCTTTTTCTGAAAGACACTTCATTTACATGGAACCAGAAAA  
CCACACAGGGATTCCAGAATTTTACCTGTTGGGACTTTCAGAGAATCCAGAGATTGAGT  
CCGTTCTCTTTGGGCTGTTCTTG

>6 WOM\_Olfr371

GATGGAACCAAATAAACAACACAGCTCCTGACATTGTCATTCACTAACCCAAGCATAACA  
TGAAAAACAATCCCCCTGCTCCAGAGAACATTGCTGTGGTTCAGGAATCACTCTTTAC  
CTCGTCTCACTGACCCTGCTGACTCATTAGCTCCACCAGTCTCTTTTTCTGAAAGACACT  
TCATTTACATGGAACCAGAAAACCACACAGGGATTCCAGAATTTTACCTGTTGGGACTT  
TCAGAGAATCCAGAGATTGAGTCCGTTCTCTTTGGGCTGTTCTTG

>7 WOM\_Olfr371

ATACATGAAAAACAATCCCCCTGCTCCAGAGAACATTGCTGTGGTTCAGGAATCACTC  
TTTACCTCGTCTCACTGACCCTGCTGACTCATTAGCTCCACCAGTCTCTTTTTCTGAAAG  
ACCTGAACCTCTCTCAGTCTTGGTGAGGAAAGCTTCTTTTTGCAGTGGGCAGCAGTCAG  
TGAGGACTCATGGCTGGTCAACATGCTGGGAATAACTGATTGTGAGTGCTCAGCCCTAA  
AGGAGACATCTTTATCACCTCTCGTGCTTTCAGGGCTCAGGGAACACTGTGTGAAGGAG  
GCAGAGAGGATGTAAAGGACAGCAGACACTTCATTTACATGGAACCAGAAAACCACACA  
GGGATTCCAGAATTTTACCTGTTGGGACTTTCAGAGAATCCAGAGATTGAGTCCGTTCT  
CTTTGGGCTGTTCTTG

>8 WOM\_Olfr371

GGAGAATTGAGTTCATGGAACCAAATAAACAACACAGCTCCTGACATTGTCATTCACTA  
ACCCAAGCATAACATGAAAAACAATCCCCCTGCTCCAGAGAACATTGCTGTGGTTCAGG  
AATCACTCTTTACCTCGTCTCACTGACCCTGCTGACTCATTAGCTCCACCAGTCTCTTT  
TCTGAAAGACCTGAACCTCTCTCAGTCTTGGTGAGGAAAGCTTCTTTTTGCAGTGGGCA  
GCAGTCAGTGAGGACTCATGGCTGGTCAACATGCTGGGAATAACTGATTACACTTCATT  
TACATGGAACCAGAAAACCACACAGGGATTCCAGAATTTTACCTGTTGGGACTTTCAGA  
GAATCCAGAGATTGAGTCCGTTCTCTTTGGGCTGTTCTTG

>9 WOM\_Olfr371

GAATTGAGTTCATGGAACCAAATAAACAACACAGCTCCTGACATTGTCATTCACTAACC  
CAAGCATAACATGAAAAACAATCCCCCTGNTCCAGANAACATTGCTNTGGTTCAGGAAT  
CACTCTTTACCTCGTCTCACTGACCCTGCTGACTCATTAGCTCCACCAGTCTCTTTTCT  
GAAAGACCTGAACCTCTCTCAGTCTTGGTGAGGAAAGCTTCTTTTTGCAGTGGGCAGCA  
GTCAGTGAGGACTCNNGGCTGGTCAACATGCTGGGAATAACTGATTACACTTCATTTAC  
ATGGAACCAGAAAACCACACAGGGATTCCAGAATTTTACCTGTTGGGACNTTCAGAGAA  
TCCAGAGATTGAGTCCGTTCTCTTTGGGCTGTTCTTG

>10 WOM\_Olfr371

GAGAATTGAGTTCATGGAACCAAATAAACAACACAGCTCCTGACATTGTCATTCACTAA  
CCCAAGCATAACATGAAAAACAATCCCCCTGCTCCAGAGAACATTGCTGTGGTTCAGGA  
ATCACTCTTTACCTCGTCTCACTGACCCTGCTGACTCATTAGCTCCACCAGTCTCTTTT  
CTGAAAGACCTGAACCTCTCTCAGTCTTGGTGAGGAAAGCTTCTTTTTGCAGTGGGCAG  
CAGTCAGTGAGGACTCATGGCTGGTCAACATGCTGGGAATAACTGATTACACTTCATTT

ACATGGAACCAGAAAACCACACAGGGATTCCAGAATTTTACCTGTTGGGACTTTCAGAG  
AATCCAGAGATTCAGTCCGTTCTCTTTGGGCTGTTCTTG

>1 OSNs\_Olfr371

GGAACAT<sup>1</sup>TGCTGTGGTTCAGGAATCACTCTTTACCTCGTCTCACTGACCCTGCTGACTC  
ATTAGCTCCACCAGTCTCTTTTCTGAAAAGACCTGAACCTCTCTCAGTCTTGGTGAGGAA  
AGCTTCTTTTTTGCAGTGGGCAGCAGTCAGTGAGGACTCATGGCTGGTCAACATGCTGGG  
AATAACTGATTACACTTCATTTACATGGAACCAGAAAACCACACAGGGATTCCAGAATT  
TTACCTGTTGGGACTTTCAGAGAATCCAGAGATTCAGTCCGTTCTCTTTGGGCTGTTCT  
TG

>2 OSNs\_Olfr371

GATGGAACCAAATAAACAACACAGCTCCTGACATTGTCATTCACTAACCCAAGCATAACA  
TGAAAAACAATCCCCCTGCTCCAGAGAACATTGCTGTGGTTCAGGAATCACTCTTTAC  
CTCGTCTCACTGACCCTGCTGACTCATTAGCTCCACCAGTCTCTTTTCTGAAAAGACCTG  
AACCTCTCTCAGTCTTGGTGAGGAAAGCTTCTTTTTTGCAGTGGGCAGCAGTCAGTGAGG  
ACTCATGGCTGGTCAACATGCTGGGAATAACTGATTACACTTCATTTACATGGAACCAG  
AAAACCACACAGGGATTCCAGAATTTTACCTGTTGGGACTTTCAGAGAATCCAGAGATT  
CAGTCCGTTCTCTTTGGGCTGTTCTTG

>3 OSNs\_Olfr371

GATTGCTGTGGTTCAGGAATCACTCTTTACCTCGTCTCACTGACCCTGCTGACTCATT  
GCTCCACCAGTCTCTTTTCTGAAAAGACACTTCATTTACATGGAACCAGAAAACCACACA  
GGGATTCCAGAATTTTACCTGTTGGGACTTTCAGAGAATCCAGAGATTCAGTCCGTTCT  
CTTTGGGCTGTTCTTG

>4 OSNs\_Olfr371

GGTTCATGGAACCAAATAAACAACGCAGCTCCTGACATTGTCATTCACTAACCCAAGCA  
TACATGAAAAACAATCCCCCTGCTCCAGAAAACATTGCTGTGGTTCAGGAATCACTCT  
TTACCTCGTCTCACTGACCCTGCTGACTCATTAGCTCCACCAGTCTCTTTTCTGAAAGA  
CACTTCATTTACATGGAACCAGAAAACCACACAGGGATTCCAGAATTTTACCTGTTGGG  
ACTTTCAGAGAATCCAGAGATTCAGTCCGTTCTCTTTGGGCTGTTCTTG

>5 OSNs\_Olfr371

GATGGAACCAAATAAACAACACAGCTCCTGACATTGTCATTCACTAACCCAAGCATAACA  
TGAAAAACAATCCCCCTGCTCCAGAGAACATTGCTGTGGTTCAGGAATCACTCTTTAC  
CTCGTCTCACTGACCCTGCTGACTCATTAGCTCCACCAGTCTCTTTTCTGAAAAGACCTG  
AACCTCTCTCAGTCTTGGTGAGGAAAGCTTCTTTTTTGCAGTGGGCAGCAGTCAGTGAGG  
ACTCATGGCTGGTCAACATGCTGGGAATAACTGATTACACTTCATTTACATGGAACCAG  
AAAACCACACAGGGATTCCAGAATTTTACCTGTTGGGACTTTCAGAGAATCCAGAGATT  
CAGTCCGTTCTCTTTGGGCTGTTCTTG

>6 OSNs\_Olfr371

GAACTTAGAAACCTCAGCCTCTAAAGAGAAGCAAGCACTAAGCCAACACATCATGTAC  
CAATGTGTGGAGTCTGAGTTAAGGCAGATGCACTCCGCTATATTTGTTTCCCTCTTAGTT  
CAGCCATCCTGTTTCTTCTCTTTTATAGACACTTCATTTACATGGAACCAGAAAACCAC  
ACAGGGATTCCAGAATTTTACCTGTTGGGACTTTCAGAGAATCCAGAGATTCAGTCCG  
TCTCTTTGGGCTGTTCTTGAATCGAATTCCC GCGGCC

>7 OSNs\_Olfr371

ATCTGAATACTACATATAAGTGCTATAGCTAGGAGTCCTTACCCACAGGAGAGTATGG  
CTGAACTTAGAAACCTCAGCCTCTAAAGAGAAGCAAGCACTAAGCCAACACATCATGT  
ACCAATGTGTGGAGTCTGAGTTAAGGCAGATGCACTCCGCTATATTTGTTTCCCTCTTAG

TTCAGCCATCCTGTTTCTTCTCTTTTATAGACACTTCATTTACATGGAACCAGAAAACC  
ACACAGGGATTCCAGAATTTTACCTGTTGGGACTTTTCAGAGAATCCAGAGATTCAGTCC  
GTTCTCTTTGGGCTGTTCTTG

>8 OSNs\_Olfr371

AAGCATA<sup>~</sup>CATGAAAAACAATCCCCCTGCTCCAGAGAACATTGCTGTGGTTCAGGAATC  
ACTCTTTACCTCGTCTCACTGACCCTGCTGACTCATTAGCTCCACCAGTCTCTTTTCTG  
AAAGACCTGAACCTCTCTCAGTCTTGGTGAGGAAAGCTTCTTTTTGCAGTGGGCAGCAG  
TCAGTGAGGACTCATGGCTGGTCAACATGCTGGGAATAACTGATTACACTTCATTTACA  
TGGAACCAGAAAACCACACAGGGATTCCAGAATTTTACCTGTTGGGACTTTTCAGAGAAT  
CCAGAGATTCAGTCCGTTCTCTTTGGGCTGTTCTTG

>9 OSNs\_Olfr371

GGAATTGAGTTCATGGAACCAAATAAACAACACAGCTCCTGACATTGTCATTCACTAAC  
CCAAGCATACATGAAAAACAATCCCCCTGCTCCAGAGAGCGTTGCTGTGGTTCAGGAA  
TCACTCTTTACCTCGTCTCACTGACCCTGCTGACTCATTAGCTCCACCAGTCTCTTTTCT  
TGAAAGACACTTCATTTACATGGAACCAGAAAACCACACAGGGATTCCAGAATTTTACC  
TGTTGGGACTTTTCGAGAGAATCCAGAGACTCAGTCCGTTCTCTTTGGGCTGTTCTTG

>10 OSNs\_Olfr371

ATCTGAATACTACATATAAGTGCTATAGCTAGGAGTCCTTACCCACAGGAGAGTATGG  
CTGAACCTAGAAACCTCAGCCTCTAAAGAGAAGCAAGCACTAAGCCAACACATCATGTC  
ACCAATGTGTGGAGTCTGAGTTAAGGCAGATGCACTCCGCTATATTTGTTTCTCTTAG  
TTCAGCCATCCTGTTTCTTCTCTTTTATAGACACTTCATTTACATGGAACCAGAAAACC  
ACACAGGGATTCCAGAATTTTACCTGTTGGGACTTTTCAGAGAATCCAGAGATTCAGTCC  
GTTCTCTTTGGGCTGTTCTTG

>1 WOM\_Olfr466

GGGCTGTGGAATTTTGTGTGTGCATAATTTACTGCAGAGTTGAAGAGGAACTCAAGGC  
TCAGCTAGAAAGGGAAGGAAAGATACTACATATCTAGCTGTACTTATTCCAATTTTTCA  
TGGCATATGGAACACAGTAGACCAATGTTATAAACAGAATGATTCTAATGCTATACAAA  
AGTCTATAATTTAACTTAATCCTGTAGGTAGTAAAGTGTGAAATTTTTCTTCTTCTTGT  
ATATCCTCTTTCTTTTCCATCCTCTCTGGTTATAAAATGACAAATTTTACACGTGTCTC  
AGAGTTTATTCTACTTGGATTCAGAGGAGGTCTGGTATACAAATGTTGCTATTTCTGA  
TTTTTTTTATTTTTGTATGTTATAGCAGTGGTGGGGAATTTTGGCATGA

>2 WOM\_Olfr466

GGGGCTGTGGAATTTTGTGTGTGCATAATTTACTGCAGAGTTGAAGAGGAACTCAAGG  
CTCAGCTAGAAAGGGAAGGAAAGATACTACATATCTAGCTGTACTTATTCCAATTTTTCT  
ATGGCATATGGAACACGGTAGACCAATGTTATAAACAGAATGATTCTAATGCTATACAAA  
AAGTCTATAATTTAACTTAATCCTGTAGGTAGTAAAGTGTGAAATTTTTCTTCTTCTTG  
TATATCCTCTTTCTTTTCCATCCTCTCTGGTTATAAAATGACAAATTTTACACGTGTCT  
CAGAGTTTATTCTACTTGGATTCAGAGGAGGTCTGGTATACAAATGTTGCTATTTCTG  
ATTTTTTTATTTTTGTATGTTATAGCAGTGGTGGGGAATTTTGGCATGA

>3 WOM\_Olfr466

GGGGCTGTGGAATTTTGTGTGTGCATAATTTACTGCAGAGTTGAAGAGGAACTCAAGG  
CTCAGCTAGAAAGGGAAGGAAAGATACTACATATCTAGCTGTACTTATTCCAATTTTTCT  
ATGGCATATGGAACACAGTAGACCAATGTTATAAACAGAGTGATTCTAATGCTATACAAA  
AAGTCTATAATTTAACTTAATCCTGTAGGTAGTAAAGTGTGAAATTTTTCTTCTTCTTG  
TATATCCTCTTTCTTTTCCATCCTCTCTGGTTATAAAATGACAAATTTTACACGTGTCT

CAGAGTTTATTCTACTTGGATTTCAGAGGAGGTCCTGGTATACAAATGTTGCTATTTCTG  
ATTTTTTTATTTTTGTATGTTATAGCAGTGGTGGGGAATTTTGGCATGA

>4 WOM\_Olfr466

GGGGAAGGCTCAGCTAGAAAGGGAAGGAAAGATACTACATATCTAGCTGTACTTATTCC  
AATTTTTTCATGGCATATGGAACACAGTAGACCAATGTTATAAACAGAATGATTCTAATG  
CTATACAAAAGTCTATAAATTTAACTTAATCCTGTAGGTAGTAAAGTGTGAAATTTTTCT  
TCTTCTTGTATATCCTCTTTCTTTTCCATCCTCTCTGGTTATAAAATGACAAATTTTAC  
ACGTGTCTCAGAGTTTATTCTACTTGGATTTCAGAGGAGGTCCTGGTATACAAATGTTG  
TATTTCTGATTTTTTTATTTTTGTATGTTATAGCAGTGGTGGGGAATTTTGGCATGA

>5 WOM\_Olfr466

GTGGGCTGTGGAAATTTTGTGTGTGCATAATTTACTGCAGAGTTGAAGAGGAACTCAAG  
GCTCAGCTAGAAAGGGAAGGAAAGATACTACATATCTAGCTGTACTTATTCCAATTTTT  
CATGGCATATGGAACACAGTAGACCAATGTTATAAACAGAATGATTCTAATGCTATACA  
AAAGTCTATAAATTTAACTTAATCCTGTAGGTAGTAAAGTGTGAAATTTTTCTTCTTCTT  
GTATATCCTCTTTCTTTTCCATCCTCTCTGGTTATAAAATGACAAATTTTACACGTGTC  
TCAGAGTTTATTCTACTTGGATTTCAGAGGAGGTCCTGGTATACAAATGTTGCTATTTCT  
GATTTTTTTATTTTTGTATGTTATAGCAGTGGTGGGGAATTTTGGCATGA

>6 WOM\_Olfr466

GGGGCTGTGGAAATTTTGTGTGTGCATAATTTACTGCAGAGTTGAAGAGGAACTCAAGG  
CTCAGCTAGAAAGGGAAGGAAAGATACTACATATCTAGCTGTACTTATTCCAATTTTTCT  
ATGGCATATGGAACACAGTAGACCAATGTTATAAACAGAATGATTCTAATGCTATACAA  
AAGTCTATAAATTTAACTTAATCCTGTAGGTAGTAAAGTGTGAAATTTTTCTTCTTCTTG  
TATATCCTCTTTCTTTTCCATCCTCTCTGGTTATAAAATGACAAATTTTACACGTGTC  
CAGAGTTTATTCTACTTGGATTTCAGAGGAGGTCCTGGTATACAAATGTTGCTATTTCTG  
ATTTTTTTATTTTTGTATGTTATAGCAGTGGTGGGGAATTTTGGCATGA

>7 WOM\_Olfr466

TGGGCTGTGGAAATTTTGTGTGTGCATAATTTACTGCAGAGTTGAAGAGGAACTCAAGG  
CTCAGCTAGAAAGGGAAGGAAAGATACTACATATCTAGCTGTACTTATTCCAATTTTTCT  
ATGGCATATGGAGCACAGTAGACCAATGTTATAAACAGAATGATTCTAATGCTATACAA  
AAGTCTATAAATTTAACTTAATCCTGTAGGTAGTAAAGTGTGAAATTTTTCTTCTTCTTG  
TATATCCTCTTTCTTTTCCATCCTCTCTGGTTATAAAATGACAAATTTTACACGTGTC  
CAGAGTTTATTCTACTTGGATTTCAGAGGAGGTCCTGGTATACAAATGTTGCTATTTCTG  
ATTTTTTTATTTTTGTATGTTATAGCAGTGGTGGGGAATTTTGGCATGA

>8 WOM\_Olfr466

GGGGCTGTGGAAATTTTGTGTGTGCATAATTTACTGCAGAGTTGAAGAGGAACTCAAGG  
CTCAGCTAGAAAGGGAAGGAAAGATACTACATATCTAGCTGTACTTATTCCAATTTTTCT  
ATGGCATATGGAACACAGTAGACCAATGTTATAAACAGAATGATTCTAATGCTATACAA  
AAGTCTATAAATTTAACTTAATCCTGTAGGTAGTAAAGTGTGAAATTTTTCTTCTTCTTG  
TATATCCTCTTTCTTTTCCATCCTCTCTGGTTATAAAATGACAAATTTTACACGTGTC  
CAGAGTTTATTCTACTTGGATTTCAGAGGAGGTCCTGGTATACAAATGTTGCTATTTCTG  
ATTTTTTTATTTTTGTATGTTATAGCAGTGGTGGGGAATTTTGGCATGA

>9 WOM\_Olfr466

GGGGCTGTGGAAATTTTGTGTGTGCATAATTTACTGCAGAGTTGAAGAGGAACTCAAGG  
CTCAGCTAGAAAGGGAAGGAAAGGTACTACATATCTAGCTGTACTTATTCCAATTTTTCT  
ATGGCATATGGAACACAGTAGACCAATGTTATAAACAGAATGATTCTACTGCTATACAA  
AAGTCTATAAATTTAACTTAATCCTGTAGGTAGTAAAGTGTGAAATTTTTCTTCTTCTTG  
TATATCCTCTTTCTTTTCCATCCTCTCTGGTTATAAAATGACAAATTTTACACGTGTC

CAGAGTTTATTCTACTTGGATTTCAGAGGAGGTCCTGGTATACAAATGTTGCTATTTCTG  
ATTTTTTTATTTTTGTATGTTATAGCAGTGGTGGGAATTTTGGCATGA

>10 WOM\_Olfr466

GGGGCTGTGGAAATTTTGTGTGTGCATAATTTACTGCAGAGTTGAAGAGGAACTCAAGG  
CTCAGCTAGAAAGGGAAGGAAAGATACTACATATCTAGCTGTACTTATTTCCAATTTTTTC  
ATGGCATATGGAACACAGTAGACCAATGTTATAAACAGAATGATTCTAATGCTATACAA  
AAGTCTATAATTTAACTTAATCCTGTAGGTAGTAAAGTGTGAAATTTTTCTTCTTCTTG  
TATATCCTCTTTCTTTTCCATCCTCTCTGGTTATAAAAATGACAAATTTTACACGTGTCT  
CAGAGTTTATTCTACTTGGATTTCAGAGGAGGTCCTGGTATACAAATGTTGCTATTTCTG  
ATTTTTTTATTTTTGTATGTTATAGCAGTGGTGGGAATTTTGGCATGA

>11 WOM\_Olfr466

GGGGCTGTGGAAATTTTGTGTGTGCATAATTTACTGCAGAGTTGAAGAGGAACTCAAGG  
CTCAGCTAGAAAGGGAAGGAAAGATACTACATATCTAGCTGTACTTATTTCCAATTTTTTC  
ATGGCATATGGAACACAGTAGACCAATGTTATAAACAGAATGATTCTAATGCTATACAA  
AAGTCTATAATTTAACTTAATCCTGTAGGTAGTAAAGTGTGAAATTTTTCTTCTTCTTG  
TATATCCTCTTTCTTTTCCATCCTCTCTGGTTATAAAAATGACAAATTTTACACGTGTCT  
CAGAGTTTATTCTACTTGGATTTCAGAGGAGGTCCTGGTATACAAATGTTGCTATTTCTG  
ATTTTTTTATTTTTGTATGTTATAGCAGTGGTGGGAATTTTGGCATGA

>12 WOM\_Olfr466

TGGGCTGTGGAAATTTTGTGTGTGCATAATTTACTGCAGAGTTGAAGAGGAACTCAAGG  
CTCAGCTAGAAAGGGAAGGAAAGATACTACATATCTAGCTGTACTTATTTCCAATTTTTTC  
ATGGCATATGGAACACAGTAGACCAATGTTATAAACAGAATGATTCTAATGCTATACAA  
AAGTCTATAATTTAACTTAATCCTGTAGGTAGTAAAGTGTGAAATTTTTCTTCTTCTTG  
TATATCCTCTTTCTTTTCCATCCTCTCTGGTTATAAAAATGACAAATTTTACACGTGTCT  
CAGAGTTTATTCTACTTGGATTTCAGAGGAGGTCCTGGTATACAAATGTTGCTATTTCTG  
ATTTTTTTATTTTTGTATGTTATAGCAGTGGTGGGAATTTTGGCATGA

>13 WOM\_Olfr466

GGGGCTGTGGAAATTTTGTGTGTGCATAATTTACTGCAGAGTTGAAGAGGAACTCAAGG  
CTCAGCTAGAAAGGGAAGGAAAGATACTACATATCTAGGTGAGGTCTATCTATTTTATA  
GAAAATATAACGTTTTCTCAAAGACACTGTGACCAATTATATTAAGTATATTTGAATTT  
TAGTTAAATAGATGAAGATTCTGGATCAATCATACTTTTCTGAGAATAACAATTGATTC  
ATGAACATAACAGGCATCAATCCAAATTCATTGGAGAAGCAATGTACCCTAAACTATTA  
ATAACTATAAAACTGAGATTGTGCTTACTATATGCCAGGAATCTGCACAAAACCTTTCAC  
CTATAAAATGCTTTAGACTTTACAGTGAACCATCACTTTTAATATCCACACCCAACAGG  
TTAAGCTACCAGGAAAGTGGTCATATTAAGGCCAGGGTTTTTGACACCAGGGCCTTATT  
ATACCAGATATTAGTACACTGAACTCTTCTCTGTTTCATATCACTACTTTGAATATTA  
GAGATTCCTAGTAATAAGCAAATTTGGAAAACAATAGCCAAAATTTTTCAAATTTGTAAA  
TACCCCATGCATACAAATACCTACCTCATAAATGCACAGCTTCATCACTTATTGTTTTA  
AAATTTGGTATCTCACTATAACAACAAAATCTCAATTTACTGAAGTACAAGTGTTCCTTT  
AGAGAGGATACTAAATTANATTAAGTTTTATGTGGTATTTGTATAATAGCTCATGAAGA  
AGTGTGTATCAGAGATAGAANAAGTAAGAGAANAATAATTTAACAAGAGAGCACATAAA  
TTACAATAAAAGATCTAATTTTTATAAGAAGATATATTACTTGATTTATTTTGTCTTAT  
AGCTTAACAAAATTCATTAGTTTGTCTAGAACGTATCCAATAAATTTTTT

>14 WOM\_Olfr466

GGGGCTGTGGAAATTTTGTGTGTGCATAATTTACTGCAGAGTTGAAGAGGAAATTC AAGG  
CTCAGCTAGAAAGGGAAGGAAAGATACTACATATCTAGCTGTACTTATTTCCAATTTTTTC  
ATGGCATATGGAACACAGTAGACCAATGTTATAAACAGAATGATTCTAATGCTATACAA

AAGTCTATAATTTAACTTAATCCTGTAGGTAGTAAAGTGTGAAATTTTTCTTCTTCTTG  
TATATCCTCTTTCTTTTCCATCCTCTCTGGTTATAAAATGACAAATTTTACACGTGTCT  
CAGAGTTTATTCTACTTGGATTTCAGAGGAGGTCCTGGTATGCAAATGTTGCTATTTCTG  
ATTTTTTTATTTTTGTATGTTATAGCAGTGGTGGGGAATTTTGGCATGA

>1 OSNs\_Olfr466

AGCAGTGGTGGGGAATTTTGGCATGA

>2 OSNs\_Olfr466

GGGGCTGTGGAAATTTTGTGTGTGCATAATTTACTGCAGAGTTGAAGAGGAACTCAAGG  
CTCAGCTAGAAAGGGAAGGAAAGATACTACATATCTAGCTGTACTTATTCCAATTTTTTC  
ATGGCATATGGAACACAGTAGACCAATGTTATAAACAGAATGATTCTAATGCTATACAA  
AAGTCTATAATTTAACTTAATCCTGTAGGTAGTAAAGTGTGAAATTTTTCTTCTTCTTG  
TATATCCTCTTTCTTTTCCATCCTCTCTGGTTATAAAATGACAAATTTTACACGTGTCT  
CAGAGTTTATTCTACTTGGATTTCAGAGGAGGTCCTGGTATACAAATGTTGCTATTTCTG  
ATTTTTTTATTTTTGTATGTTATAGCAGTGGTGGGGAATTTTGGCATGA

>3 OSNs\_Olfr466

AGCAGTGGTGGGGAATTTTGGCATGA

>4 OSNs\_Olfr466

GGGGCTGTGGAAATTTTGTGTGTGCATAATTTACTGCAGAGTTGAAGAGGAACTCAAGG  
CTCAGCTAGAAAGGGAAGGAAAGATACTACATATCTAGCTGTACTTATTCCAATTTTTTC  
ATGGCATATGGAACACAGTAGACCAATGTTATAAACAGAATGATTCTAATGCTATACAA  
AAGTCTATAATTTAACTTAATCCTGTAGGTAGTAAAGTGTGAAATTTTTCTTCTTCTTG  
TATATCCTCTTTCTTTTCCATCCTCTCTGGTTATAAAATGACAAATTTTACACGTGTCT  
CAGAGTTTATTCTACTTGGATTTCAGAGGAGGTCCTGGTATACAAATGTTGCTATTTCTG  
ATTTTTTTATTTTTGTATGTTATAGCAGTGGTGGGGAATTTTGGCATGA

>5 OSNs\_Olfr466

AAGCAGTGGTGGGGAATTTTGGCATGA

>6 OSNs\_Olfr466

AAGCAGTGGTGGGGAATTTTGGCATGA

>7 OSNs\_Olfr466

AAGCAGTGGTGGGGAATTTTGGCATGA

>8 OSNs\_Olfr466

AAGCAGTGGTGGGGAATTTTGGCATGA

>9 OSNs\_Olfr466

AAGCAGTGGTGGGGAATTTTGGCATGA

>10 OSNs\_Olfr466

AAGCAGTGGTGGGGAATTTTGGCATGA

>11 OSNs\_Olfr466

GCAGTGGTGGGGAATTTTGGCATGA

>12 OSNs\_Olfr466

GGGCTGTGGAAATTTTGTGTGTGCATAATTTACTGCAGAGTTGAAGAGGAACTCAAGGC  
TCAGCTAGAAAGGGAAGGAAAGATACTACATATCTAGCTGTACTTATTCCAATTTTTTCA  
TGGCATATGGAACACAGTAGACCAATGTTATAAACAGAATGATTCTAATGCTATACAAA  
AGTCTATAATTTAACTTAATCCTGTAGGTAGTAAAGTGTGAAATTTTTCTTCTTCTTGT  
ATATCCTCTTTCTTTTCCATCCTCTCTGGTTATAAAATGACAAATTTTACACGTGTCTC  
AGAGTTTATTCTACTTGGATTTCAGAGGAGGTCCTGGTATACAAATGTTGCTATTTCTGA  
TTTTTTTTATTTTTGTATGTTATAGCAGTGGTGGGGAATTTTGGCATGA

>13 OSNs\_Olfr466  
AAGCAGTGGTGGGGAATTTTGGCATGA

>14 OSNs\_Olfr466  
AAGCAGTGGTGGGGAATTTTGGCATGA

>15 OSNs\_Olfr466  
AAGCAGTGGTGGGGAATTTTGGCATGA

>16 OSNs\_Olfr466  
GGGGCTGTGGAAATTTTGTGTGTGCATAATTTACTGCAGAGTTGAAGAGGAACTCAAGG  
CTCAGCTAGAAAGGGAAGGAAAGATACTACATATCTAGCTGTACTTATTCCAATTTTTC  
ATGGCATATGGAACACAGTAGACCAATGTTATAAACAGAATGATTCTAATGCTATACAA  
AAGTCTATAATTTAACTTAATCCTGTAGGTAGTAAAGTGTGAAATTTTCTTCTTCTTG  
TATATCCTCTTTCTTTTCCATCCTCTCTGGTTATAAAATGACAAATTTTACACGTGTCT  
CAGAGTTTATTCTACTTGGATTTCAGAGGAGGTCCTGGTATACAAATGTTGCTATTTCTG  
ATTTTTTTATTTTTGTATGTTATAGCAGTGGTGGGGAATTTTGGCATGA

>17 OSNs\_Olfr466  
GGGGCTGTGGAAATTTTGTGTAAGTGCCTGTAAGAGGAACTAGGCTCAGAGAAAGGGAA  
GGAAAGATACTACATATCTAGCTACTTATTCCAATTTTATGGCATATGGACACAGTAG  
ACCAATAACAGAATGATTCTAATGCTATACAAAAGTCTATAATTTAACTTAATCCTGTA  
GGTAGTAAAGAAATTTTCTTCTTCTTGTATATCCTCTTTCTTTTCCATCCTCTCTGGT  
TATAAAATGACAAATTTTACACGTGTCTCAGAGTTTATTCTACTTGGATTTCAGAGGAGG  
TCCGGTATACAAATGTTGCTATTTCTGATTTTTTTATTTTTGTATGTTATAGCAGTGG  
TGGGGAATTTTGGCATGA

>1 WOM\_Olfr1402  
CCCTGTAGGTTGGGGTGGTTGGAAAATCCCAGGAAGATGAATTCTGTGACACGTGTGTG  
ATTGGTCATTTCAAATGGAGTCATCGCACTGACATCTGTTGGAAGCCCTGTGTCGCTGG  
CTTTGGTGTGAGTGGGGATCAGTGTCTGCACAGCACTGGACATTGGTAGAATTAGCTG  
TTGACCTTCATGAATCATGATGACCTGCCATCCTGAGAGCTGCCTCTTACACACTCAAT  
ACTTCACAGAGGAGTCAAATCCTGTGGTTTTCTCCATAGTTCACTTTTCTGGGATGACAA  
TTATAAAGGTTTCATGGACTAACCTTTAGAGAGTAGCCTAAGTAATCTCTCTCTCAGCAG  
CTGTCTGAAACGCCTTAGCACACAAATACAAATCC

>2 WOM\_Olfr1402  
CCCTGTAGGTTGGGGTGGTTGGAAAATCCCAGGAAGATGAATTCTGTGACACGTGTGTG  
ATTGGTCATTTCAAATGGAGTCATTGCTTTAGAGAGTAGCCTAAGTAATCTCTCTCTCA  
GCAGCTGTCTGAAACGCCTTAGCACACAAATACAAATCC

>3 WOM\_Olfr1402  
CCCTGTAGGTTGGGGTGGTTGGAAAATCCCAGGAAGATGAATTCTGTGACACGTGTGTG  
ATTGGTCATTTCAAATGGAGTCATTGCACTGACATCTGTTGGAAGCCCTGTGTCGCTGG  
CTTTGGTGTGAGTGGGGATCAGTGTCTGCACAGCACTGGACATTGGTAGAATTAGCTG  
TTGACCTTCATGAATCATGATGACCTGCCATCCTGAGAGCTGCCTCTTACACACTCAAT  
ACTTCACAGAGGAGTCAAATCCTGTGGTTTTCT

>4 WOM\_Olfr1402  
CCCTGTAGGTTGGGGTGGTTGGAAAATCCCAGGAAGATGAATTCTGTGACACGTGTGTG  
ATTGGTCATTTCAAATGGAGTCATTGCTTTAGAGAGTAGCCTAAGTAATCTCTCTCTCA  
GCAGCTGTCTGAAACGCCTTAGCACACAAATACAAATCC

>5 WOM\_Olfr1402

CCCTGTAGGTTGGGGTGGTTGGAAAATCCCAGGAAGATGAATTCTGTGACACGTGTGTG  
ATTGGTCATTTCAAATGGAGTCATTGCACTGACATCTGTTGGAAGCCCTGTGTGCGCTGG  
CTTTGGTGTGAGTGGGGATCAGTGTCTGCACAGCACTGGACATTGGTAGAATTAGCTG  
TTGACCTTCATGAATCATGATGACCTGCCATCCTGAGAGCTGCCTCTTACACACTCAAT  
ACTTCACAGAGGAGTCAAATCCTGTGGTTTCTCCATAGTTCACTTTTCTGGGATGACAA  
TTATAAAGGTTTCATGGACTAACCTTTAGAGAGTAGCCTAAGTAATCTCTCTCTCAGCAG  
CTGTCTGAAACGCCTTAGCACACAAATACAAATCAAAGGCAACAGCCAAAACAGAAGCT  
GTAGAAATGAAGAACAATTAACCTCTCT

>6 WOM\_Olfr1402

CCCTGTAGGTTGGGGTGGTTGGAAAATCCCAGGAAGATGAATTCTGTGACACGTGTGTG  
ATTGGTCATTTCAAATGGAGCCATTGCTTTAGAGAGTAGCCTAAGTAATCTCTCTCTCA  
GCC

>7 WOM\_Olfr1402

CCCTGTAGGTTGGGGTGGTTGGAAAATCCCAGGAAGATGAATTCTGTGACACGTGTGTG  
ATTGGTCATTTCAAATGGAGTCATTGCTTTAGAGAGTAGCCTAAGTAATCTCTCTCTCA  
GCAGCTGTCTGAAACGCCTTAGCACACAAATACAAATCC

>8 WOM\_Olfr1402

CCCTGTAGGTTGGGGTGGTTGGAAAATCCCAGGAAGATGAATTCTGTGACACGTGTGTG  
ATTGGTCATTTCAAATGGAGTCATTGCACTGACATCTGTTGGAAGCCCTGTGTGCGCTGG  
CTTTGGTGTGAGTGGGGATCAGTGTCTGCACAGCACTGGACATTGGTAGAATTAGCTG  
TTGACCTTCATGAATCATGATGACCTGCCATCCTGAGAGCTGCCTCTTACACACTCAAT  
ACTTCACAGAGGAGTCAAATCCTGTGGTTTCTCCATAGTTCACTTTTCTGGGATGACAA  
TTATAAAGGTTTCATGGACTAACCTTTAGAGAGTAGCCTAAGTAATCTCTCTCTCAGCAG  
CTGTCTGAAACGCCTTAGCACACAAATACAAATCAAAGGCAACAGCCAAAACAGAAGCT  
GTAGAAATC

>9 WOM\_Olfr1402

CCCTGTAGGTTGGGGTGGTTGGAAAATCCCAGGAAGATGAATTCTGTGACACGTGTGTG  
ATTGGTCATTTCAAATGGAGTCATTGCTTTAGAGAGTAACCTAAGTAATCTCTCTCTCA  
GCAGCTGTCTGAAACGCCTTAGCACACAAATACAAATCAAAGGCCCCCATGTACTCTGC  
GTTGATAACCAC

>10 WOM\_Olfr1402

CCCTGTAGGTTGGGGTGGTTGGAAAATCCCAGGAAGATGAATTCTGTGACACGTGTGTG  
ATTGGTCATTTCAAATGGAGCCATTGCTTTAGAGAGTAGCCTAAGTAATCTCTCTCTCA  
GCC

>11 WOM\_Olfr1402

CCCTGTAGGTTGGGGTGGTTGGAAAATCCCAGGAAGATGAATTCTGTGACACGTGTGTG  
ATTGGTCATTTCAAATGGAGTCATTGCACTGACATCTGTTGGAAGCCCTGTGTGCGCTGG  
CTTTGGTGTGAGTGGGGATCAGTGTCTGCACAGCACTGGACATTGGTAGAATTAGCTG  
TTGACCTTCATGAATCATGATGACCTGCCATCCTGAGAGCTGCCTCTTACACACTCAAT  
ACTTCACAGAGGAGTCAAATCCTGTGGTTTCTCCATAGTTCACTTTTCTGGGATGACAA  
TTATAAAGGTTTCATGGACTAACCTTTAGAGAGTAGCCTAAGTAATCTCTCTCTCAGCAG  
CTGTCTGAAACGCCTTAGCACACAAATACAAATC

>12 WOM\_Olfr1402

CCCTGTAGGTTGGGGTGGTTGGAAAATCACAGGAAGATGAATTCTGTGACACGTGTGTG  
ATTGGTCATTTCAAATGGAGTCATTGCTTTAGAGAGTAGCCTAAGTAATCTCTCTCTCA  
GCAGCTGTCTGAAACGCCTTAGCACACAAATACAAATCC



>1 OSNs\_Olfr1402

CCCTGTAGGTTGGGGTGGTTGGAAAATCCCAGGAAGATGAATTCTGTGACACGTGTGTG  
ATTGGTCATTTCAAATGGAGTCATTGCACTGACATCTGTTGGAAGCCCTGTGTCGCTGG  
CTTTGGTGTGAGTGGGGATCAGTGTCTGCACAGCACTGGACATTGGTAGAATTAGCTG  
TTGACCTTCATGAATCATGATGACCTGCCATCCTGAGAGCTGCCTCTTACACACTCAAT  
ACTTCACAGAGGAGTCAAATCCTGTGGTTTCTCCATAGTTCACTTTTCTGGGATGACAA  
TTATAAAGGTTTCATGGACTAACCTTTAGAGAGTAGCCTAAGTAATCTCTCTCTCAGCAG  
CTGTCTGAAACGCCTTAGCACACAAATACAAATCC

>2 OSNs\_Olfr1402

CCCTGTAGGTTGGGGTGGTTGGAAAATCCCAGGAAGATGAATTCTGTGACACGTGTGTG  
ATTGGTCATTTCAAATGGAGTCATTGCTACAGAGAACAAGGATCGAGAGTAAATATGT  
ACAGAAGATACTGACAAACATGGTTCTGAATTACCAGGGTCATGTCCAGTAAAGAGTCA  
TAAAGGTATCTGGATAGTGGTCACCTGCTGGGCTAGCCTTCATATGATCAGTATTTAG  
GCCAAGCCAACTTTGGACCCCAGGATTTTCCACAAACCTGCATGGCTGATAAGGGGTGA  
GAATAAATGGAAACACAGTCACAGCCAACACTAAGCCCTCAATGCTTACATTACTATAA  
ACTTGTGTTTTCTCGTCTCAATGCTATCTCTCTCTTATTATCCTCCTTTTTTAAAAAC  
ATTTAATTTTTCTCTAAAAGACATAAGTTTTTCATTAATAAAAAAAGCAGAAAGAAAATCA  
AATGAATTCAGTCACCTGCAGATCATATCAGTACTACCTCTCAGAGCATTGCACTTTAG  
GGCATTTTCTCTCCCATTTGTGCACTTAAGGGGTGTGTGTGTGCATGTACACACATGTTT  
ATGGGTAGGTGTAATGTGCACATATTTGTATATGTACATGGAAACCACAGGTCAATCTT  
TGGTGTAGTTTTCTTTGGAACATTCACCTTATTTTTTTGAGGCAGGGTCTTTCAGTGGG  
ACCTTAGGGTGGCCAAATAGGCTATACTGGCTCTCCTATGAGCTCCAAGGAGCCTTCTG  
TGTCTGCTTACCCAGTACTGGGATTACAAGTGTGTTGCCAACAATACCTG

>3 OSNs\_Olfr1402

CCCTGTAGGTTGGGGTGGTTGGAAAATCCCAGGAAGATGAATTCTGTGACACGTGTGTG  
ATTGGTCATTTCAAATGGAGTCATTGCACTGACATCTGTTGGAAGCCCTGTGTCGCTGG  
CTTTGGTGTGAGTGGGGATCAGTGTCTGCACAGCACTGGACATTGGTAGAATTAGCTG  
TTGACCTTCATGAATCATGATGACCTGCCATCCTGAGAGCTGCCTCTTACACACTCAAT  
ACTTCACAGAGGAGTCAAATCCTGTGGTTTCTCCATC

>4 OSNs\_Olfr1402

CCCTGTAGGTTGGGGTGGTTGGAAAATCCCAGGAAGATGAATTCTGTGACACGTGTGTG  
ATTGGTCATTTCAAATGGAGTCATTGCTACAGAGAACAAGGATCGAGAGTAAATATGT  
ACAGAAGATACTGACAAACATGGTTCTGAATTACCAGGGTCATGTCCAGTAAAGAGTCA  
TAAAGGTATCTGGATAGTGGTCACCTGCTGGGCTAGCCTTCATATGATCAGTATTTAG  
GCCAAGCCAACTTTGGACCCCAGGATTTTCCACAAACCTGCATGGCTGATAAGGGGTGA  
GAATAAATGGGAACACAGTCACAGCCAACACTAAGCCCTCAATGCTTACATTACTATAA  
ACTTGTGTTTTCTCGTCTCAATGCTATCTCTCTCTTATTATCCTCCTTTTTTAAAAAC  
ATTTAATTTTTCTCTAAAAGACGTAAGTTTTTCATTAATAAAAAAAGCAGAAAGAAAATCA  
AATGAATTCAGTCACCTGCAGATCATATCAGTACTACCTCTCAGAGCATTGCACTTTAG  
GGCATTTTCTCT

>5 OSNs\_Olfr1402

CCCTGTAGGTTGGGGTGGTTGGAAAATCCCAGGAAGATGAATTCTGTGACACGTGTGTG  
ATTGGTCATTTCAAATGGAGTCATTGCACTGACATCTGTTGGAAGCCCTGTGTCGCTGG  
CTTTGGTGTGAGTGGGGATCAGTGTCTGCACAGCACTGGACATTGGTAGAATTAGCTG  
TTGACCTTCATGAATCATGATGACCTGCCATCCTGAGAGCTGCCTCTTACACACTCAAT  
ACTTCACAGAGGAGTCAAATCCTGTGGTTTCTCC

>6 OSNs\_Olfr1402

CCCTGTAGGTTGGGGTGGTTGGAAAATCCCGGGAAGATGAATTCTGTGACACGTGTGTG  
ATTGGTCATTTCAAATGGAGTCATTGCTTTAGAGAGTAGCCTAAGTAATCTCTCTCTCA  
GCAGCTGTCTGAAACGCCTTAGCACACAAATACC

>7 OSNs\_olfr1402

CACTAGTGATTCACTAAGCCCTCAATGCTTACATTACTATAAACTTGTGGTTTCCTCGT  
CTCAATGCTATCTCTCTCTTATTATCCTCCTTTTTTTGAAAACATTTAATTTTTCTCTAA  
AAGACATAAGTTTTTCATTAAAAAAAAGCAGAAAGAAAATCAAATGAATTCAGTCACCT  
GCAGATCATATCAGTACTACC

>8 OSNs\_olfr1402

CCCTGTAGGTTGGGGTGGTTGGAAAATCCCAGGAAGATGAATTCTGTGACACGTGTGTG  
ATTGGTCATTTCAAATGGAGTCATTGCACTGACATCTGTTGGAAGCCCTGTGTCGCTGG  
CTTTGGTGTGAGTGGGGATCAGTGTCTGCACAGCACTGGACATTGGTAGAATTAGCTG  
TTGACCTTCATGAATCATGATGACCTGCCATCCTGAGAGCTGCCTCTTACACACTCAAT  
ACTTCACAGAGGAGTCAAATCCTGTGGTTTCTCCATAGTTCACTTTTCTGGGATGACAA  
TTATAAAGGTTTCATGGACTAACCTTTAGAGAGTAGCCTAAGTAATCTCTCTCTCAGCAG  
CTGTCTGAAACGCCTTAGCACACAAATACAAATCAAAGGCAACAGCCAAAACC

>9 OSNs\_olfr1402

CCCTGTAGGTTGGGGTGGTTGGAAAATCCCAGGAAGATGAATTCTGTGACACGCGTGTG  
ATTGGTCATTTCAAATGGAGTCATTGCTTTAGAGAGTAGCCTAGGTAATCTCTCTCTCA  
GCAGCTGTCTGAAACGCCTTAGCACACAAATACAAATCAAAGGCAACAGCCAAAACAGA  
AGCTGTAGAAAT
