# Supplementary material for: The Mouse Solitary Odorant Receptor Gene Promoters as Models for the Study of Odorant Receptor Gene Choice
Source: PubMed Central journal article supplement (PMC4721658; doi:10.1371/journal.pone.0144698), 2016-01-21
Supplement: pone.0144698.s004.pdf [file pone.0144698.s004.pdf]

## Putative promoters variants in FASTA format

>Olf6r6 C57BL/6J

TCTGCATACTATTTCAAATAATCTTAATACATTAAGGAGAGATAGTGACTTTTATCAC  
AGAGAGGAAGGAAAAATGAAGGCTTGGGACCTACCCAGGTGAGGCAGTGGGAGGAGT  
CAACACATAAAGCAACTAGGGAGACCAGGGATTGTTGGAAGAGAAATAGGTCAGGAG  
CAAAGTAAGAGAAAGAGTGAGAGAAGACTGAGAAAGGCAATGAACAGTGATGGAGA  
AAAAGCACAACAATAGGAAAACCTCTTCTATCCTGGCCTCTAGGAGTATCAGGCAAG  
CCCAATAGTAAGAACA

>Olf6r6 Wild\_consensus

TCTGCATACTATTTCAAATAATCTTAATACATTAAGGAGAGATAGTGACTTTTATCAC  
AGAGAGGAAGGAAAAATGAAGGCTTGGGACCTACCCAGGTGAGGCAGTGGGAGGAGT  
CAACACATAAAGCAACTAGGGAGACCAGGGATTGTTGGAAGAGAAATAGGTCAGGAG  
CAAAGTAAGAGAAAGAGTGAGAGAAGACTGAGAAAGGCAATGAACAGTGATGGAGA  
AAAAGCACAACAATAGGAAAACCTCTTCTATCCTGGCCTCTAGGAGTATCAGGCAAG  
CCCAATAGTAAGAACA

>Olf6r6 France

TCTGCATCCTATTTCAAATAATATTAATACATTAAGGAGAGATAGTGACTTTTATCAC  
AGAGAGGAAGGAAAAATGAAGGCTTGGGACCTACCCAGGTGAGACAGTGGGAGGAGT  
CAACACATAAAGCAACTAGGGAGACCAGGGATTGTTGGAAGAGAAATAGGTCAGGAG  
CAAGAGTAAGAGAAAGAGTGAGAGAAGACTGAGAAAGGCAATGAACAGTGATGGAGA  
AAAAGCACAACAATAGGAAAACCTCTTCTATCCTGGCCTCTAGGAGTATCAGGCAAG  
CCCAATAGTAAGAACA

>Olf6r6 Germany

TCTGCATACTATTTCAAATAATCTTAATACATTAAGGAGAGATAGTGACTTTTATCAC  
AGAGAGGAAGGAAAAATGAAGGCTTGGGACCTACCCAGGTGAGGCAGTGGGAGGAGT  
CAACACATAAAGCAACTAGGGAGACCAGGGATTGTTGGAAGAGAAATAGGTCAGGAG  
CAAAGTAAGAGAAAGAGTGAGAGAAGACTGAGAAAGGCAATGAACAGTGATGGAGA  
AAAAGCACAACAATAGGAAAACCTCTTCTATCCTGGCCTCTAGGAGTATCAGGCAAG  
CCCAATAGTAAGAACA

>Olf6r6 Iran

TCTGCATACTATTTCAAATAATCTTAATACATTAAGGAGAGATAGTGACTTTTATCAC  
AGAGAGGAAGGAAAAATGAAGGCTTGGGACCTACCCAGGTGAGGCAGTGGGAGGAGT  
CAACACATAAAGCAACTAGGGAGACCAGGGATTGTTGGAAGAGAAATAGGTCAGGAG  
CAAAGTAAGAGAAAGAGTGAGAGAAGACTGAGAAAGGCAATGAACAGTGATGGAGA  
AAAAGCACAACAATAGGAAAACCTCTTCTATCCTGGCCTCTAGGAGTATCAGGCAAG  
CCCAATAGTAAGAACA

>Olf6r6 129P2/OlaHsd

TCTGCATCCTATTTCAAATAATATTAATACATTAAGGAGAGATAGTGACTTTTATCAC  
AGAGAGGAAGGAAAAATGAAGGCTTGGGACCTACCCAGGTGAGACAGTGGGAGGAGT  
CAACACATAAAGCAACTAGGGAGACCAGGGATTGTTGGAAGAGAAATAGGTCAGGAG  
CAAGAGTAAGAGAAAGAGTGAGAGAAGACTGAGAAAGGCAATGAACAGTGATGGAGA  
AAAAGCACAACAATAGGAAAACCTCTTCTATCCTGGCCTCTAGGAGTATCAGGCAAG  
CCCAATAGTAAGAACA

>Olf6r6 129S1/SvImJ

TCTGCATCCTATTTCAAATAATATTAATACATTAAGGAGAGATAGTGACTTTTATCAC  
AGAGAGGAAGGAAAAATGAAGGCTTGGGACCTACCCAGGTGAGACAGTGGGAGGAGT  
CAACACATAAAGCAACTAGGGAGACCAGGGATTGTTGGAAGAGAAATAGGTCAGGAG  
CAAGAGTAAGAGAAAGAGTGAGAGAAGACTGAGAAAGGCAATGAACAGTGATGGAGA  
AAAAGCACAACAATAGGAAAACCTCTTCTATCCTGGCCTCTAGGAGTATCAGGCAAG  
CCCAATAGTAAGAACA

>Olf6r 129S5SvEvBrd

TCTGCATCCTATTTCAAATAATATTAATACATTAAGGAGAGATAGTGACTTTATCAC  
AGAGAGGAAGGAAAAATGAAGGCTTGGGACCTACCCAGGTGAGACAGTGGGAGGAGT  
CAACACATAAAGCAACTAGGGAGACCAGGGATTGTTGGAAGAGAAATAGGTCAGGAG  
CAAGAGTAAGAGAAAGAGTGAGAGAAGACTGAGAAAGGCAATGAACAGTGATGGAGA  
AAAAGCACAACAATAGGAAAACCTCTTCTATCCTGGCCTCTAGGAGTATCAGGCAAG  
CCCAATAGTAAGAACA

>Olf6r A/J

TCTGCATCCTATTTCAAATAATATTAATACATTAAGGAGAGATAGTGACTTTATCAC  
AGAGAGGAAGGAAAAATGAAGGCTTGGGACCTACCCAGGTGAGACAGTGGGAGGAGT  
CAACACATAAAGCAACTAGGGAGACCAGGGATTGTTGGAAGAGAAATAGGTCAGGAG  
CAAGAGTAAGAGAAAGAGTGAGAGAAGACTGAGAAAGGCAATGAACAGTGATGGAGA  
AAAAGCACAACAATAGGAAAACCTCTTCTATCCTGGCCTCTAGGAGTATCAGGCAAG  
CCCAATAGTAAGAACA

>Olf6r AKR/J

TCTGCATCCTATTTCAAATAATATTAATACATTAAGGAGAGATAGTGACTTTATCAC  
AGAGAGGAAGGAAAAATGAAGGCTTGGGACCTACCCAGGTGAGACAGTGGGAGGAGT  
CAACACATAAAGCAACTAGGGAGACCAGGGATTGTTGGAAGAGAAATAGGTCAGGAG  
CAAGAGTAAGAGAAAGAGTGAGAGAAGACTGAGAAAGGCAATGAACAGTGATGGAGA  
AAAAGCACAACAATAGGAAAACCTCTTCTATCCTGGCCTCTAGGAGTATCAGGCAAG  
CCCAATAGTAAGAACA

>Olf6r BALB/cJ

TCTGCATCCTATTTCAAATAATATTAATACATTAAGGAGAGATAGTGACTTTATCAC  
AGAGAGGAAGGAAAAATGAAGGCTTGGGACCTACCCAGGTGAGACAGTGGGAGGAGT  
CAACACATAAAGCAACTAGGGAGACCAGGGATTGTTGGAAGAGAAATAGGTCAGGAG  
CAAGAGTAAGAGAAAGAGTGAGAGAAGACTGAGAAAGGCAATGAACAGTGATGGAGA  
AAAAGCACAACAATAGGAAAACCTCTTCTATCCTGGCCTCTAGGAGTATCAGGCAAG  
CCCAATAGTAAGAACA

>Olf6r BTBR/T\_+\_Itpr3tf/J

TCTGCATCCTATTTCAAATAATATTAATACATTAAGGAGAGATAGTGACTTTATCAC  
AGAGAGGAAGGAAAAATGAAGGCTTGGGACCTACCCAGGTGAGACAGTGGGAGGAGT  
CAACACATAAAGCAACTAGGGAGACCAGGGATTGTTGGAAGAGAAATAGGTCAGGAG  
CAAGAGTAAGAGAAAGAGTGAGAGAAGACTGAGAAAGGCAATGAACAGTGATGGAGA  
AAAAGCACAACAATAGGAAAACCTCTTCTATCCTGGCCTCTAGGAGTATCAGGCAAG  
CCCAATAGTAAGAACA

>Olf6r BUB/BnJ

TCTGCATACTATTTCAAATAATCTTAATACATTAAGGAGAGATAGTGACTTTATCAC  
AGAGAGGAAGGAAAAATGAAGGCTTGGGACCTACCCAGGTGAGGCAGTGGGAGGAGT  
CAACACATAAAGCAACTAGGGAGACCAGGGATTGTTGGAAGAGAAATAGGTCAGGAG  
CAAAAGTAAGAGAAAGAGTGAGAGAAGACTGAGAAAGGCAATGAACAGTGATGGAGA  
AAAAGCACAACAATAGGAAAACCTCTTCTATCCTGGCCTCTAGGAGTATCAGGCAAG  
CCCAATAGTAAGAACA

>Olf6r C3H/HeH

TCTGCATCCTATTTCAAATAATATTAATACATTAAGGAGAGATAGTGACTTTATCAC  
AGAGAGGAAGGAAAAATGAAGGCTTGGGACCTACCCAGGTGAGACAGTGGGAGGAGT  
CAACACATAAAGCAACTAGGGAGACCAGGGATTGTTGGAAGAGAAATAGGTCAGGAG  
CAAGAGTAAGAGAAAGAGTGAGAGAAGACTGAGAAAGGCAATGAACAGTGATGGAGA  
AAAAGCACAACAATAGGAAAACCTCTTCTATCCTGGCCTCTAGGAGTATCAGGCAAG  
CCCAATAGTAAGAACA

>Olf6r C3H/HeJ

TCTGCATCCTATTTCAAATAATATTAATACATTAAGGAGAGATAGTGACTTTATCAC

AGAGAGGAAGGAAAAATGAAGGCTTGGGACCTACCCAGGTGAGACAGTGGGAGGAGT  
CAACACATAAAGCAACTAGGGAGACCAGGGATTGTTGGAAGAGAAATAGGTCAGGAG  
CAAGAGTAAGAGAAAGAGTGAGAGAAGACTGAGAAAGGCAATGAACAGTGATGGAGA  
AAAAGCACAACAATAGGAAAACCTCTTCTATCCTGGCCTCTAGGAGTATCAGGCAAG  
CCCAATAGTAAGAACA

>Olf6 C57BL/10J

TCTGCATACTATTTCAAATAATCTTAATACATTAAGGAGAGATAGTGACTTTATCAC  
AGAGAGGAAGGAAAAATGAAGGCTTGGGACCTACCCAGGTGAGGCAGTGGGAGGAGT  
CAACACATAAAGCAACTAGGGAGACCAGGGATTGTTGGAAGAGAAATAGGTCAGGAG  
CAAAGTAAGAGAAAGAGTGAGAGAAGACTGAGAAAGGCAATGAACAGTGATGGAGA  
AAAAGCACAACAATAGGAAAACCTCTTCTATCCTGGCCTCTAGGAGTATCAGGCAAG  
CCCAATAGTAAGAACA

>Olf6 C57BL/6NJ

TCTGCATACTATTTCAAATAATCTTAATACATTAAGGAGAGATAGTGACTTTATCAC  
AGAGAGGAAGGAAAAATGAAGGCTTGGGACCTACCCAGGTGAGGCAGTGGGAGGAGT  
CAACACATAAAGCAACTAGGGAGACCAGGGATTGTTGGAAGAGAAATAGGTCAGGAG  
CAAAGTAAGAGAAAGAGTGAGAGAAGACTGAGAAAGGCAATGAACAGTGATGGAGA  
AAAAGCACAACAATAGGAAAACCTCTTCTATCCTGGCCTCTAGGAGTATCAGGCAAG  
CCCAATAGTAAGAACA

>Olf6 C57BR/cdJ

TCTGCATACTATTTCAAATAATCTTAATACATTAAGGAGAGATAGTGACTTTATCAC  
AGAGAGGAAGGAAAAATGAAGGCTTGGGACCTACCCAGGTGAGGCAGTGGGAGGAGT  
CAACACATAAAGCAACTAGGGAGACCAGGGATTGTTGGAAGAGAAATAGGTCAGGAG  
CAAAGTAAGAGAAAGAGTGAGAGAAGACTGAGAAAGGCAATGAACAGTGATGGAGA  
AAAAGCACAACAATAGGAAAACCTCTTCTATCCTGGCCTCTAGGAGTATCAGGCAAG  
CCCAATAGTAAGAACA

>Olf6 C57L/J

TCTGCATACTATTTCAAATAATCTTAATACATTAAGGAGAGATAGTGACTTTATCAC  
AGAGAGGAAGGAAAAATGAAGGCTTGGGACCTACCCAGGTGAGGCAGTGGGAGGAGT  
CAACACATAAAGCAACTAGGGAGACCAGGGATTGTTGGAAGAGAAATAGGTCAGGAG  
CAAAGTAAGAGAAAGAGTGAGAGAAGACTGAGAAAGGCAATGAACAGTGATGGAGA  
AAAAGCACAACAATAGGAAAACCTCTTCTATCCTGGCCTCTAGGAGTATCAGGCAAG  
CCCAATAGTAAGAACA

>Olf6 C58/J

TCTGCATACTATTTCAAATAATCTTAATACATTAAGGAGAGATAGTGACTTTATCAC  
AGAGAGGAAGGAAAAATGAAGGCTTGGGACCTACCCAGGTGAGGCAGTGGGAGGAGT  
CAACACATAAAGCAACTAGGGAGACCAGGGATTGTTGGAAGAGAAATAGGTCAGGAG  
CAAAGTAAGAGAAAGAGTGAGAGAAGACTGAGAAAGGCAATGAACAGTGATGGAGA  
AAAAGCACAACAATAGGAAAACCTCTTCTATCCTGGCCTCTAGGAGTATCAGGCAAG  
CCCAATAGTAAGAACA

>Olf6 CAST/EiJ

TCTGCATACTATTTCAAATAATCTTAATACATTAAGGAGAGATAGTGACTTTATCAC  
AGAGAGGAAGGAAAAATGAAGGCTTGGGACCTACCCAGGTGAGGCAGTGGGAGGAGT  
CAACACATAAAGCAACTAGGGAGACCAGGGATTGTTGGAAGAGAAATAGGTCAGGAG  
CAAAGTAAGAGAAAGAGTGAGAGAAGACTGAGAAAGGCAATGAACAGTGATGGAGA  
AAAAGCACAACAATAGGAAAACCTCTTCTATCCTGGCCTCTAGGAGTATCAGGCAAG  
CCCAATAGTAAGAACA

>Olf6 CBA/J

TCTGCATCCTATTTCAAATAATATTAATACATTAAGGAGAGATAGTGACTTTATCAC  
AGAGAGGAAGGAAAAATGAAGGCTTGGGACCTACCCAGGTGAGACAGTGGGAGGAGT  
CAACACATAAAGCAACTAGGGAGACCAGGGATTGTTGGAAGAGAAATAGGTCAGGAG

CAAGAGTAAGAGAAAGAGTGAGAGAAGACTGAGAAAGGCAATGAACAGTGATGGAGA  
AAAAGCACAACAATAGGAAAACCTCTTCTATCCTGGCCTCTAGGAGTATCAGGCAAG  
CCCAATAGTAAGAACA

>Olf6 DBA/1J

TCTGCATCCTATTTCAAATAATATTAATACATTAAGGAGAGATAGTGACTTTATCAC  
AGAGAGGAAGGAAAAATGAAGGCTTGGGACCTACCCAGGTGAGACAGTGGGAGGAGT  
CAACACATAAAGCAACTAGGGAGACCAGGGATTGTTGGAAGAGAAATAGGTCAGGAG  
CAAGAGTAAGAGAAAGAGTGAGAGAAGACTGAGAAAGGCAATGAACAGTGATGGAGA  
AAAAGCACAACAATAGGAAAACCTCTTCTATCCTGGCCTCTAGGAGTATCAGGCAAG  
CCCAATAGTAAGAACA

>Olf6 DBA/2J

TCTGCATCCTATTTCAAATAATATTAATACATTAAGGAGAGATAGTGACTTTATCAC  
AGAGAGGAAGGAAAAATGAAGGCTTGGGACCTACCCAGGTGAGACAGTGGGAGGAGT  
CAACACATAAAGCAACTAGGGAGACCAGGGATTGTTGGAAGAGAAATAGGTCAGGAG  
CAAGAGTAAGAGAAAGAGTGAGAGAAGACTGAGAAAGGCAATGAACAGTGATGGAGA  
AAAAGCACAACAATAGGAAAACCTCTTCTATCCTGGCCTCTAGGAGTATCAGGCAAG  
CCCAATAGTAAGAACA

>Olf6 FVB/NJ

TCTGCATACTATTTCAAATAATCTTAATACATTAAGGAGAGATAGTGACTTTATCAC  
AGAGAGGAAGGAAAAATGAAGGCTTGGGACCTACCCAGGTGAGGCAGTGGGAGGAGT  
CAACACATAAAGCAACTAGGGAGACCAGGGATTGTTGGAAGAGAAATAGGTCAGGAG  
CAAAGTAAGAGAAAGAGTGAGAGAAGACTGAGAAAGGCAATGAACAGTGATGGAGA  
AAAAGCACAACAATAGGAAAACCTCTTCTATCCTGGCCTCTAGGAGTATCAGGCAAG  
CCCAATAGTAAGAACA

>Olf6 I/LnJ

TCTGCATCCTATTTCAAATAATATTAATACATTAAGGAGAGATAGTGACTTTATCAC  
AGAGAGGAAGGAAAAATGAAGGCTTGGGACCTACCCAGGTGAGACAGTGGGAGGAGT  
CAACACATAAAGCAACTAGGGAGACCAGGGATTGTTGGAAGAGAAATAGGTCAGGAG  
CAAGAGTAAGAGAAAGAGTGAGAGAAGACTGAGAAAGGCAATGAACAGTGATGGAGA  
AAAAGCACAACAATAGGAAAACCTCTTCTATCCTGGCCTCTAGGAGTATCAGGCAAG  
CCCAATAGTAAGAACA

>Olf6 KK/HiJ

TCTGCATACTATTTCAAATAATCTTAATACATTAAGGAGAGATAGTGACTTTATCAC  
AGAGAGGAAGGAAAAATGAAGGCTTGGGACCTACCCAGGTGAGGCAGTGGGAGGAGT  
CAACACATAAAGCAACTAGGGAGACCAGGGATTGTTGGAAGAGAAATAGGTCAGGAG  
CAAAGTAAGAGAAAGAGTGAGAGAAGACTGAGAAAGGCAATGAACAGTGATGGAGA  
AAAAGCACAACAATAGGAAAACCTCTTCTATCCTGGCCTCTAGGAGTATCAGGCAAG  
CCCAATAGTAAGAACA

>Olf6 LEWES/EiJ

TCTGCATACTATTTCAAATAATCTTAATACATTAAGGAGAGATAGTGACTTTATCAC  
AGAGAGGAAGGAAAAATGAAGGCTTGGGACCTACCCAGGTGAGGCAGTGGGAGGAGT  
CAACACATAAAGCAACTAGGGAGACCAGGGATTGTTGGAAGAGAAATAGGTCAGGAG  
CAAAGTAAGAGAAAGAGTGAGAGAAGACTGAGAAAGGCAATGAACAGTGATGGAGA  
AAAAGCACAACAATAGGAAAACCTCTTCTATCCTGGCCTCTAGGAGTATCAGGCAAG  
CCCAATAGTAAGAACA

>Olf6 LP/J

TCTGCATCCTATTTCAAATAATATTAATACATTAAGGAGAGATAGTGACTTTATCAC  
AGAGAGGAAGGAAAAATGAAGGCTTGGGACCTACCCAGGTGAGACAGTGGGAGGAGT  
CAACACATAAAGCAACTAGGGAGACCAGGGATTGTTGGAAGAGAAATAGGTCAGGAG  
CAAGAGTAAGAGAAAGAGTGAGAGAAGACTGAGAAAGGCAATGAACAGTGATGGAGA  
AAAAGCACAACAATAGGAAAACCTCTTCTATCCTGGCCTCTAGGAGTATCAGGCAAG

CCCAATAGTAAGAACA

>Olf6r6 MOLE/EiJ

TCTGCATCCTATTTCAAATAATATTAATACATTAAGGAGAGATAGTGACTTTTATCAC  
AGAGAGGAAGGAAAAATGAAGGCTTGGGACCTACCTAGGTGAGACAGTGGGAGGAGT  
CAACACATAAAGCAACTAGGGAGACCAGGGATTGTTGGAAGAGAAATAGGTCAGGAG  
CAAGAGTAAGAGAAAAGAGTGAGAGAAGACTGAGAAAAGGCAATGAACAGTGATGGAGA  
AAAAGCACAACAATAGGAAAACCTCTTCTATCCTGGCCTCTAGGAGTATCAGGCAAG  
CCCAATAGTAAGAACA

>Olf6r6 NOD/ShiLtJ

TCTGCATCCTATTTCAAATAATATTAATACATTAAGGAGAGATAGTGACTTTTATCAC  
AGAGAGGAAGGAAAAATGAAGGCTTGGGACCTACCCAGGTGAGACAGTGGGAGGAGT  
CAACACATAAAGCAACTAGGGAGACCAGGGATTGTTGGAAGAGAAATAGGTCAGGAG  
CAAGAGTAAGAGAAAAGAGTGAGAGAAGACTGAGAAAAGGCAATGAACAGTGATGGAGA  
AAAAGCACAACAATAGGAAAACCTCTTCTATCCTGGCCTCTAGGAGTATCAGGCAAG  
CCCAATAGTAAGAACA

>Olf6r6 NZB/B1NJ

TCTGCATCCTATTTCAAATAATATTAATACATTAAGGAGAGATAGTGACTTTTATCAC  
AGAGAGGAAGGAAAAATGAAGGCTTGGGACCTACCCAGGTGAGACAGTGGGAGGAGT  
CAACACATAAAGCAACTAGGGAGACCAGGGATTGTTGGAAGAGAAATAGGTCAGGAG  
CAAGAGTAAGAGAAAAGAGTGAGAGAAGACTGAGAAAAGGCAATGAACAGTGATGGAGA  
AAAAGCACAACAATAGGAAAACCTCTTCTATCCTGGCCTCTAGGAGTATCAGGCAAG  
CCCAATAGTAAGAACA

>Olf6r6 NZO/H1LtJ

TCTGCATCCTATTTCAAATAATATTAATACATTAAGGAGAGATAGTGACTTTTATCAC  
AGAGAGGAAGGAAAAATGAAGGCTTGGGACCTACCCAGGTGAGACAGTGGGAGGAGT  
CAACACATAAAGCAACTAGGGAGACCAGGGATTGTTGGAAGAGAAATAGGTCAGGAG  
CAAGAGTAAGAGAAAAGAGTGAGAGAAGACTGAGAAAAGGCAATGAACAGTGATGGAGA  
AAAAGCACAACAATAGGAAAACCTCTTCTATCCTGGCCTCTAGGAGTATCAGGCAAG  
CCCAATAGTAAGAACA

>Olf6r6 NZW/LacJ

TCTGCATCCTATTTCAAATAATATTAATACATTAAGGAGAGATAGTGACTTTTATCAC  
AGAGAGGAAGGAAAAATGAAGGCTTGGGACCTACCCAGGTGAGACAGTGGGAGGAGT  
CAACACATAAAGCAACTAGGGAGACCAGGGATTGTTGGAAGAGAAATAGGTCAGGAG  
CAAGAGTAAGAGAAAAGAGTGAGAGAAGACTGAGAAAAGGCAATGAACAGTGATGGAGA  
AAAAGCACAACAATAGGAAAACCTCTTCTATCCTGGCCTCTAGGAGTATCAGGCAAG  
CCCAATAGTAAGAACA

>Olf6r6 PWK/PhJ

TCTGCATACTATTTCAAATAATCTTAATACATTAAGGAGAGATAGTGACTTTTATCAC  
AGAGAGGAAGGAAAAATGAAGGCTTGGGACCTACCCAGGTGAGGCAGTGGGAGGAGT  
CAACACATAAAGCAACTAGGGAGACCAGGGATTGTTGGAAGAGAAATAGGTCAGGAG  
CAAAAGTAAGAGAAAAGAGTGAGAGAAGACTGAGAAAAGGCAATGAACAGTGATGGAGA  
AAAAGCACAACAATAGGAAAACCTCTTCTATCCTGGCCTCTAGGAGTATCAGGCAAG  
CCCAATAGTAAGAACA

>Olf6r6 RF/J

TCTGCATCCTATTTCAAATAATATTAATACATTAAGGAGAGATAGTGACTTTTATCAC  
AGAGAGGAAGGAAAAATGAAGGCTTGGGACCTACCCAGGTGAGACAGTGGGAGGAGT  
CAACACATAAAGCAACTAGGGAGACCAGGGATTGTTGGAAGAGAAATAGGTCAGGAG  
CAAGAGTAAGAGAAAAGAGTGAGAGAAGACTGAGAAAAGGCAATGAACAGTGATGGAGA  
AAAAGCACAACAATAGGAAAACCTCTTCTATCCTGGCCTCTAGGAGTATCAGGCAAG  
CCCAATAGTAAGAACA

>Olf6r6 SEA/GnJ

TCTGCATCCTATTTCAAATAATATTAATACATTAAGGAGAGATAGTGACTTTTATCAC  
AGAGAGGAAGGAAAAATGAAGGCTTGGGACCTACCCAGGTGAGACAGTGGGAGGAGT  
CAACACATAAAGCAACTAGGGAGACCAGGGATTGTTGGAAGAGAAATAGGTCAGGAG  
CAAGAGTAAGAGAAAGAGTGAGAGAAGACTGAGAAAGGCAATGAACAGTGATGGAGA  
AAAAGCACAACAATAGGAAAACCTCTTCTATCCTGGCCTCTAGGAGTATCAGGCAAG  
CCCAATAGTAAGAACA

>Olf6 SPRET/EiJ

TCTGCATACTATTTCAAATAATCTTAATACATTAAGGAGAGATAGTGACTTTTATCAC  
AGAGAGGAAGGAAAAATGAAGGCTTGGGACCTACCCAGGTGAGGCAGTGGGAGGAGT  
CAACACATAAAGCAACTAGGGAGACCAGGGATTGTTGGAAGAGAAATAGGTCAGGAG  
CAAAGTAAGAGAAAGAGTGAGAGAAGACTGAGAAAGGCAATGAACAGTGATGGAGA  
AAAAGCACAACAATAGGAAAACCTCTTCTATCCTGGCCTCTAGGAGTATCAGGCAAG  
CCCAATAGTAAGAACA

>Olf6 ST/bJ

TCTGCATACTATTTCAAATAATCTTAATACATTAAGGAGAGATAGTGACTTTTATCAC  
AGAGAGGAAGGAAAAATGAAGGCTTGGGACCTACCCAGGTGAGGCAGTGGGAGGAGT  
CAACACATAAAGCAACTAGGGAGACCAGGGATTGTTGGAAGAGAAATAGGTCAGGAG  
CAAAGTAAGAGAAAGAGTGAGAGAAGACTGAGAAAGGCAATGAACAGTGATGGAGA  
AAAAGCACAACAATAGGAAAACCTCTTCTATCCTGGCCTCTAGGAGTATCAGGCAAG  
CCCAATAGTAAGAACA

>Olf6 WSB/EiJ

TCTGCATACTATTTCAAATAATCTTAATACATTAAGGAGAGATAGTGACTTTTATCAC  
AGAGAGGAAGGAAAAATGAAGGCTTGGGACCTACCCAGGTGAGGCAGTGGGAGGAGT  
CAACACATAAAGCAACTAGGGAGACCAGGGATTGTTGGAAGAGAAATAGGTCAGGAG  
CAAAGTAAGAGAAAGAGTGAGAGAAGACTGAGAAAGGCAATGAACAGTGATGGAGA  
AAAAGCACAACAATAGGAAAACCTCTTCTATCCTGGCCTCTAGGAGTATCAGGCAAG  
CCCAATAGTAAGAACA

>Olf6 ZALENDE/EiJ

TCTGCATACTATTTCAAATAATCTTAATACATTAAGGAGAGATAGTGACTTTTATCAC  
AGAGAGGAAGGAAAAATGAAGGCTTGGGACCTACCCAGGTGAGGCAGTGGGAGGAGT  
CAACACATAAAGCAACTAGGGAGACCAGGGATTGTTGGAAGAGAAATAGGTCAGGAG  
CAAAGTAAGAGAAAGAGTGAGAGAAGACTGAGAAAGGCAATGAACAGTGATGGAGA  
AAAAGCACAACAATAGGAAAACCTCTTCTATCCTGGCCTCTAGGAGTATCAGGCAAG  
CCCAATAGTAAGAACA

>Olf19 C57BL/6J

TGAAGTCTGGTTTGCCTAACATTTAATCAGATGTCTTGGGAACAGAGACTCCACAAG  
AAACACATATTTCAATGAAAAGCAAAGTCCCATAGGAAAATTATGTAATCAGGTCTG  
GAGATGACAAGAGGGAAATATACATAATATGCAGATACACAGACCTTTAAGTACCTC  
CCCTGTCTTTGTCTCCACGTATGCAAACTGCTGTGGACAGAACATTTCCGTTTTCT  
TAAGGGTGTTTCAGCTATCTTGAAGCTGATTCATGACCCCTTCTGCTGTCTTCGAA  
CTATTTTCAGTCCTTA

>Olf19 Wild\_consensus

TGAAGTCTGGTTTGCCTAACATTTAATCAGATGTCTTGGGAACAGAGACTCCACAAG  
AAACACATATTTCAATGAAAAGCAAAGTCCCATAGGAAAATTATGTAATCAGGTCTG  
GAGATGACAAGAGGGAAATATACATAATATGCAGATACACAGACCTTTAAGTACCTC  
CCCTGTCTTTGTCTCCACGTATGCAAACTGCTGTGGACAGAACATTTCCGTTTTCT  
TAAGGGTGTTTCAGCTATCTTGAAGCTGATTCATGACCCCTTCTGCTGTCTTCGAA  
CTATTTTCAGTCCTTA

>Olf19 France

TGAAGTCTGGTTTGCCTAACATTTAATCAGATGTCTTGGGAACAGAGACTCCACAAG

AAACACATATTTCAATGAAAAGCAAAGTCCCATAGGAAAATTATGTAATCAGGTCTG  
GAGATGACAAGAGGGGAAATATACATAATATGCAGATACACAGACCTTTAAGTACCTC  
CCCTGTCTTTGTCTCCACGTATGCAACACTGCTGTGGACAGAACATTTCCGTTTTCT  
TAAGGGTGTTTCAGCTATCTTGGAAGCTGATTCATGACCCCTTCTGCTGTCTTCGAA  
CTATTTTCAGTCCTTA

>Olf19 Germany

TGAAGTCTGGTTTGCCTAACATTTAATCAGATGTCTTGGGAACAGAGACTCCACAAG  
AAACACATATTTCAATGAAAACAAAGTCCCATAGGAAAATTATGTAATCAGGTCTG  
GAGATGACAAGAGGGGAAATATACATAATATGCAGATACACAGACCTTTAAGTACCTC  
CCCTGTCTTTGTCTCCACGTATGCAACACTGCTGTGGACAGAACATTTCCGTTTTCT  
TAAGGGTGTTTCAGCTATTTTGAAGCTGATTCACGACCCCTTCTGCTGTCTTCGAA  
CTATTTTCAGTCCTTA

>Olf19 Iran

TGAAGTCTGGTTTGCCTAACATTTAATCAGATGTCTTGGGAACAGAGACTCCACAAG  
AAACACATATTTCAATGAAAAGCAAAGTCCCATAGGAAAATTATGTAATCAGGTCTG  
GAGATGACAAGAGGGGAAATATACATAATATGCAGATACACAGACCTTTAAGTACCTC  
CCCTGTCTTTGTCTCCACGTATGCAACACTGCTGTGGACAGAACATTTCCGTTTTCT  
TAAGGGTGTTTCAGCTATCTTGGAAGCTGATTCATGACCCCTTCTGCTGTCTTCGAA  
CTATTTTCAGTCCTTA

>Olf19 129P2/OlaHsd

TGAAGTCTGGTTTGCCTAACATTTAATCAGATGTCTTGGGAACAGAGACTCCACAAG  
AAACACATATTTCAATGAAAAGCAAAGTCCCATAGGAAAATTATGTAATCAGGTCTG  
GAGATGACAAGAGGGGAAATATACATAATATGCAGATACACAGACCTTTAAGTACCTC  
CCCTGTCTTTGTCTCCACGTATGCAACACTGCTGTGGACAGAACATTTCCGTTTTCT  
TAAGGGTGTTTCAGCTATCTTGGAAGCTGATTCATGACCCCTTCTGCTGTCTTCGAA  
CTATTTTCAGTCCTTA

>Olf19 129S1/SvImJ

TGAAGTCTGGTTTGCCTAACATTTAATCAGATGTCTTGGGAACAGAGACTCCACAAG  
AAACACATATTTCAATGAAAAGCAAAGTCCCATAGGAAAATTATGTAATCAGGTCTG  
GAGATGACAAGAGGGGAAATATACATAATATGCAGATACACAGACCTTTAAGTACCTC  
CCCTGTCTTTGTCTCCACGTATGCAACACTGCTGTGGACAGAACATTTCCGTTTTCT  
TAAGGGTGTTTCAGCTATCTTGGAAGCTGATTCATGACCCCTTCTGCTGTCTTCGAA  
CTATTTTCAGTCCTTA

>Olf19 129S5SvEvBrd

TGAAGTCTGGTTTGCCTAACATTTAATCAGATGTCTTGGGAACAGAGACTCCACAAG  
AAACACATATTTCAATGAAAAGCAAAGTCCCATAGGAAAATTATGTAATCAGGTCTG  
GAGATGACAAGAGGGGAAATATACATAATATGCAGATACACAGACCTTTAAGTACCTC  
CCCTGTCTTTGTCTCCACGTATGCAACACTGCTGTGGACAGAACATTTCCGTTTTCT  
TAAGGGTGTTTCAGCTATCTTGGAAGCTGATTCATGACCCCTTCTGCTGTCTTCGAA  
CTATTTTCAGTCCTTA

>Olf19 A/J

TGAAGTCTGGTTTGCCTAACATTTAATCAGATGTCTTGGGAACAGAGACTCCACAAG  
AAACACATATTTCAATGAAAAGCAAAGTCCCATAGGAAAATTATGTAATCAGGTCTG  
GAGATGACAAGAGGGGAAATATACATAATATGCAGATACACAGACCTTTAAGTACCTC  
CCCTGTCTTTGTCTCCACGTATGCAACACTGCTGTGGACAGAACATTTCCGTTTTCT  
TAAGGGTGTTTCAGCTATCTTGGAAGCTGATTCATGACCCCTTCTGCTGTCTTCGAA  
CTATTTTCAGTCCTTA

>Olf19 AKR/J

TGAAGTCTGGTTTGCCTAACATTTAATCAGATGTCTTGGGAACAGAGACTCCACAAG  
AAACACATATTTCAATGAAAAGCAAAGTCCCATAGGAAAATTATGTAATCAGGTCTG  
GAGATGACAAGAGGGGAAATATACATAATATGCAGATACACAGACCTTTAAGTACCTC

CCCTGTCTTTGTCTCCACGTATGCAACACTGCTGTGGACAGAACATTTCCGTTTTCT  
TAAGGGTGTTTCAGCTATCTTGGAAGCTGATTCATGACCCCTTCCTGCTGTCTTCGAA  
CTATTTTCAGTCCTTA

>Olf19 BALB/cJ

TGAAGTCTGGTTTGCCTAACATTTAATCAGATGTCTTGGAACAGAGACTCCACAAG  
AAACACATATTTCAATGAAAAGCAAAGTCCCATAGGAAAATTATGTAATCAGGTCTG  
GAGATGACAAGAGGGGAAATATACATAATATGCAGATACACAGACCTTTAAGTACCTC  
CCCTGTCTTTGTCTCCACGTATGCAACACTGCTGTGGACAGAACATTTCCGTTTTCT  
TAAGGGTGTTTCAGCTATCTTGGAAGCTGATTCATGACCCCTTCCTGCTGTCTTCGAA  
CTATTTTCAGTCCTTA

>Olf19 BTBR/T\_+\_Itpr3tf/J

TGAAGTCTGGTTTGCCTAACATTTAATCAGATGTCTTGGAACAGAGACTCCACAAG  
AAACACATATTTCAATGAAAAGCAAAGTCCCATAGGAAAATTATGTAATCAGGTCTG  
GAGATGACAAGAGGGGAAATATACATAATATGCAGATACACAGACCTTTAAGTACCTC  
CCCTGTCTTTGTCTCCACGTATGCAACACTGCTGTGGACAGAACATTTCCGTTTTCT  
TAAGGGTGTTTCAGCTATCTTGGAAGCTGATTCATGACCCCTTCCTGCTGTCTTCGAA  
CTATTTTCAGTCCTTA

>Olf19 BUB/BnJ

TGAAGTCTGGTTTGCCTAACATTTAATCAGATGTCTTGGAACAGAGACTCCACAAG  
AAACACATATTTCAATGAAAAGCAAAGTCCCATAGGAAAATTATGTAATCAGGTCTG  
GAGATGACAAGAGGGGAAATATACATAATATGCAGATACACAGACCTTTAAGTACCTC  
CCCTGTCTTTGTCTCCACGTATGCAACACTGCTGTGGACAGAACATTTCCGTTTTCT  
TAAGGGTGTTTCAGCTATCTTGGAAGCTGATTCATGACCCCTTCCTGCTGTCTTCGAA  
CTATTTTCAGTCCTTA

>Olf19 C3H/HeH

TGAAGTCTGGTTTGCCTAACATTTAATCAGATGTCTTGGAACAGAGACTCCACAAG  
AAACACATATTTCAATGAAAAGCAAAGTCCCATAGGAAAATTATGTAATCAGGTCTG  
GAGATGACAAGAGGGGAAATATACATAATATGCAGATACACAGACCTTTAAGTACCTC  
CCCTGTCTTTGTCTCCACGTATGCAACACTGCTGTGGACAGAACATTTCCGTTTTCT  
TAAGGGTGTTTCAGCTATCTTGGAAGCTGATTCATGACCCCTTCCTGCTGTCTTCGAA  
CTATTTTCAGTCCTTA

>Olf19 C3H/HeJ

TGAAGTCTGGTTTGCCTAACATTTAATCAGATGTCTTGGAACAGAGACTCCACAAG  
AAACACATATTTCAATGAAAAGCAAAGTCCCATAGGAAAATTATGTAATCAGGTCTG  
GAGATGACAAGAGGGGAAATATACATAATATGCAGATACACAGACCTTTAAGTACCTC  
CCCTGTCTTTGTCTCCACGTATGCAACACTGCTGTGGACAGAACATTTCCGTTTTCT  
TAAGGGTGTTTCAGCTATCTTGGAAGCTGATTCATGACCCCTTCCTGCTGTCTTCGAA  
CTATTTTCAGTCCTTA

>Olf19 C57BL/10J

TGAAGTCTGGTTTGCCTAACATTTAATCAGATGTCTTGGAACAGAGACTCCACAAG  
AAACACATATTTCAATGAAAAGCAAAGTCCCATAGGAAAATTATGTAATCAGGTCTG  
GAGATGACAAGAGGGGAAATATACATAATATGCAGATACACAGACCTTTAAGTACCTC  
CCCTGTCTTTGTCTCCACGTATGCAACACTGCTGTGGACAGAACATTTCCGTTTTCT  
TAAGGGTGTTTCAGCTATCTTGGAAGCTGATTCATGACCCCTTCCTGCTGTCTTCGAA  
CTATTTTCAGTCCTTA

>Olf19 C57BL/6NJ

TGAAGTCTGGTTTGCCTAACATTTAATCAGATGTCTTGGAACAGAGACTCCACAAG  
AAACACATATTTCAATGAAAAGCAAAGTCCCATAGGAAAATTATGTAATCAGGTCTG  
GAGATGACAAGAGGGGAAATATACATAATATGCAGATACACAGACCTTTAAGTACCTC  
CCCTGTCTTTGTCTCCACGTATGCAACACTGCTGTGGACAGAACATTTCCGTTTTCT  
TAAGGGTGTTTCAGCTATCTTGGAAGCTGATTCATGACCCCTTCCTGCTGTCTTCGAA



CTATTTTCAGTCCTTA

>Olf19 C57BR/cdJ

TGAAGTCTGGTTTGCCTAACATTTAATCAGATGTCTTGGGAACAGAGACTCCACAAG  
AAACACATATTTCAATGAAAAGCAAAGTCCCATAGGAAAATTATGTAATCAGGTCTG  
GAGATGACAAGAGGGGAAATATACATAATATGCAGATACACAGACCTTTAAGTACCTC  
CCCTGTCTTTGTCTCCACGTATGCAACACTGCTGTGGACAGAACATTTCCGTTTTCT  
TAAGGGTGTTTCAGCTATCTTGAAGCTGATTCATGACCCCTTCTGCTGTCTTCGAA  
CTATTTTCAGTCCTTA

>Olf19 C57L/J

TGAAGTCTGGTTTGCCTAACATTTAATCAGATGTCTTGGGAACAGAGACTCCACAAG  
AAACACATATTTCAATGAAAAGCAAAGTCCCATAGGAAAATTATGTAATCAGGTCTG  
GAGATGACAAGAGGGGAAATATACATAATATGCAGATACACAGACCTTTAAGTACCTC  
CCCTGTCTTTGTCTCCACGTATGCAACACTGCTGTGGACAGAACATTTCCGTTTTCT  
TAAGGGTGTTTCAGCTATCTTGAAGCTGATTCATGACCCCTTCTGCTGTCTTCGAA  
CTATTTTCAGTCCTTA

>Olf19 C58/J

TGAAGTCTGGTTTGCCTAACATTTAATCAGATGTCTTGGGAACAGAGACTCCACAAG  
AAACACATATTTCAATGAAAAGCAAAGTCCCATAGGAAAATTATGTAATCAGGTCTG  
GAGATGACAAGAGGGGAAATATACATAATATGCAGATACACAGACCTTTAAGTACCTC  
CCCTGTCTTTGTCTCCACGTATGCAACACTGCTGTGGACAGAACATTTCCGTTTTCT  
TAAGGGTGTTTCAGCTATCTTGAAGCTGATTCATGACCCCTTCTGCTGTCTTCGAA  
CTATTTTCAGTCCTTA

>Olf19 CAST/EiJ

TGAAGTCTGGTTTGCCTAACATTTAATCAGATGTCTTGGGAACAGAGACTCCACAAG  
AAACACATATTTCAATGAAAAGCAAAGTCCCATAGGAAAATTATGTAATCAGGTCTG  
GAGATGACAAGAGGGGAAATATACATAATATGCAGATACACAGACCTTTAAGTACCTC  
CTCTGTCTTTGTCTCCACGTATGCAACATTGCTGTGGACAGAACATTTCCGTTTTCT  
TAAGGGTGTTTCAGCTATCTTGAAGCTGATTCATGACCCCTTCTGCTGTCTTCGAA  
CTATTTTCAGTCCTTA

>Olf19 CBA/J

TGAAGTCTGGTTTGCCTAACATTTAATCAGATGTCTTGGGAACAGAGACTCCACAAG  
AAACACATATTTCAATGAAAAGCAAAGTCCCATAGGAAAATTATGTAATCAGGTCTG  
GAGATGACAAGAGGGGAAATATACATAATATGCAGATACACAGACCTTTAAGTACCTC  
CCCTGTCTTTGTCTCCACGTATGCAACACTGCTGTGGACAGAACATTTCCGTTTTCT  
TAAGGGTGTTTCAGCTATCTTGAAGCTGATTCATGACCCCTTCTGCTGTCTTCGAA  
CTATTTTCAGTCCTTA

>Olf19 DBA/1J

TGAAGTCTGGTTTGCCTAACATTTAATCAGATGTCTTGGGAACAGAGACTCCACAAG  
AAACACATATTTCAATGAAAAGCAAAGTCCCATAGGAAAATTATGTAATCAGGTCTG  
GAGATGACAAGAGGGGAAATATACATAATATGCAGATACACAGACCTTTAAGTACCTC  
CCCTGTCTTTGTCTCCACGTATGCAACACTGCTGTGGACAGAACATTTCCGTTTTCT  
TAAGGGTGTTTCAGCTATCTTGAAGCTGATTCATGACCCCTTCTGCTGTCTTCGAA  
CTATTTTCAGTCCTTA

>Olf19 DBA/2J

TGAAGTCTGGTTTGCCTAACATTTAATCAGATGTCTTGGGAACAGAGACTCCACAAG  
AAACACATATTTCAATGAAAAGCAAAGTCCCATAGGAAAATTATGTAATCAGGTCTG  
GAGATGACAAGAGGGGAAATATACATAATATGCAGATACACAGACCTTTAAGTACCTC  
CCCTGTCTTTGTCTCCACGTATGCAACACTGCTGTGGACAGAACATTTCCGTTTTCT  
TAAGGGTGTTTCAGCTATCTTGAAGCTGATTCATGACCCCTTCTGCTGTCTTCGAA  
CTATTTTCAGTCCTTA

>Olf19 FVB/NJ

TGAAGTCTGGTTTGCCTAACATTTAATCAGATGTCTTGGGAACAGAGACTCCACAAG  
AAACACATATTTCAATGAAAAGCAAAGTCCCATAGGAAAATTATGTAATCAGGTCTG  
GAGATGACAAGAGGGGAAATATACATAATATGCAGATACACAGACCTTTAAGTACCTC  
CCCTGTCTTTGTCTCCACGTATGCAACACTGCTGTGGACAGAACATTTCCGTTTTCT  
TAAGGGTGTTTCAGCTATCTTGGAAAGCTGATTCATGACCCCTTCTGCTGTCTTCGAA  
CTATTTTCAGTCCTTA

>Olf19 I/LnJ

TGAAGTCTGGTTTGCCTAACATTTAATCAGATGTCTTGGGAACAGAGACTCCACAAG  
AAACACATATTTCAATGAAAAGCAAAGTCCCATAGGAAAATTATGTAATCAGGTCTG  
GAGATGACAAGAGGGGAAATATACATAATATGCAGATACACAGACCTTTAAGTACCTC  
CCCTGTCTTTGTCTCCACGTATGCAACACTGCTGTGGACAGAACATTTCCGTTTTCT  
TAAGGGTGTTTCAGCTATCTTGGAAAGCTGATTCATGACCCCTTCTGCTGTCTTCGAA  
CTATTTTCAGTCCTTA

>Olf19 KK/HiJ

TGAAGTCTGGTTTGCCTAACATTTAATCAGATGTCTTGGGAACAGAGACTCCACAAG  
AAACACATATTTCAATGAAAAGCAAAGTCCCATAGGAAAATTATGTAATCAGGTCTG  
GAGATGACAAGAGGGGAAATATACATAATATGCAGATACACAGACCTTTAAGTACCTC  
CCCTGTCTTTGTCTCCACGTATGCAACACTGCTGTGGACAGAACATTTCCGTTTTCT  
TAAGGGTGTTTCAGCTATCTTGGAAAGCTGATTCATGACCCCTTCTGCTGTCTTCGAA  
CTATTTTCAGTCCTTA

>Olf19 LEWES/EiJ

TGAAGTCTGGTTTGCCTAACATTTAATCAGATGTCTTGGGAACAGAGACTCCACAAG  
AAACACATATTTCAATGAAAAGCAAAGTCCCATAGGAAAATTATGTAATCAGGTCTG  
GAGATGACAAGAGGGGAAATATACATAATATGCAGATACACAGACCTTTAAGTACCTC  
CCCTGTCTTTGTCTCCACGTATGCAACACTGCTGTGGACAGAACATTTCCGTTTTCT  
TAAGGGTGTTTCAGCTATCTTGGAAAGCTGATTCATGACCCCTTCTGCTGTCTTCGAA  
CTATTTTCAGTCCTTA

>Olf19 LP/J

TGAAGTCTGGTTTGCCTAACATTTAATCAGATGTCTTGGGAACAGAGACTCCACAAG  
AAACACATATTTCAATGAAAAGCAAAGTCCCATAGGAAAATTATGTAATCAGGTCTG  
GAGATGACAAGAGGGGAAATATACATAATATGCAGATACACAGACCTTTAAGTACCTC  
CCCTGTCTTTGTCTCCACGTATGCAACACTGCTGTGGACAGAACATTTCCGTTTTCT  
TAAGGGTGTTTCAGCTATCTTGGAAAGCTGATTCATGACCCCTTCTGCTGTCTTCGAA  
CTATTTTCAGTCCTTA

>Olf19 MOL/EiJ

TGAAGTTTGGTTTGCCTAACATTTAATCAGATGTCTTGGGAACAGAGACTCCACAAG  
AAACACATATTTCAATGAAAAGCAAAGTCCCATAGGAAAATTATGTAATCAGGTCTG  
GAGATGACAAGAGGGGAAATATACATAATATGCAGATACACAGACCTTTAAGTACCTC  
CCCTGTCTTTGTCTCCACGTATGCAACACTGCTGTGGACAGAACATTTCCGTTTTCT  
TAAGGGTGTTTCAGCTATTTTGGAAAGCTGATTCATGACCCCTTCTGCTGTCTTCGAA  
CTATTTTCAGTCCTTA

>Olf19 NOD/ShiLtJ

TGAAGTCTGGTTTGCCTAACATTTAATCAGATGTCTTGGGAACAGAGACTCCACAAG  
AAACACATATTTCAATGAAAAGCAAAGTCCCATAGGAAAATTATGTAATCAGGTCTG  
GAGATGACAAGAGGGGAAATATACATAATATGCAGATACACAGACCTTTAAGTACCTC  
CCCTGTCTTTGTCTCCACGTATGCAACACTGCTGTGGACAGAACATTTCCGTTTTCT  
TAAGGGTGTTTCAGCTATCTTGGAAAGCTGATTCATGACCCCTTCTGCTGTCTTCGAA  
CTATTTTCAGTCCTTA

>Olf19 NZB/B1NJ

TGAAGTCTGGTTTGCCTAACATTTAATCAGATGTCTTGGGAACAGAGACTCCACAAG  
AAACACATATTTCAATGAAAAGCAAAGTCCCATAGGAAAATTATGTAATCAGGTCTG

GAGATGACAAGAGGGAAATATACATAATATGCAGATACACAGACCTTTAAGTACCTC  
CCCTGTCTTTGTCTCCACGTATGCAAACTGCTGTGGACAGAACATTTCCGTTTTCT  
TAAGGGTGTTTCAGCTATCTTGGAAGCTGATTCATGACCCCTTCTGCTGTCTTCGAA  
CTATTTTCAGTCCTTA

>Olf19 NZO/H1LtJ

TGAAGTCTGGTTTGCCTAACATTTAATCAGATGTCTTGGGAACAGAGACTCCACAAG  
AAACACATATTTCAATGAAAAGCAAAGTCCCATAGGAAAATTATGTAATCAGGTCTG  
GAGATGACAAGAGGGAAATATACATAATATGCAGATACACAGACCTTTAAGTACCTC  
CCCTGTCTTTGTCTCCACGTATGCAAACTGCTGTGGACAGAACATTTCCGTTTTCT  
TAAGGGTGTTTCAGCTATCTTGGAAGCTGATTCATGACCCCTTCTGCTGTCTTCGAA  
CTATTTTCAGTCCTTA

>Olf19 NZW/LacJ

TGAAGTCTGGTTTGCCTAACATTTAATCAGATGTCTTGGGAACAGAGACTCCACAAG  
AAACACATATTTCAATGAAAAGCAAAGTCCCATAGGAAAATTATGTAATCAGGTCTG  
GAGATGACAAGAGGGAAATATACATAATATGCAGATACACAGACCTTTAAGTACCTC  
CCCTGTCTTTGTCTCCACGTATGCAAACTGCTGTGGACAGAACATTTCCGTTTTCT  
TAAGGGTGTTTCAGCTATCTTGGAAGCTGATTCATGACCCCTTCTGCTGTCTTCGAA  
CTATTTTCAGTCCTTA

>Olf19 PWK/PhJ

TGAAGTTTGGTTTGCCTAACATTTAATCAGATGTCTTGGGAACAGAGACTCCACAAG  
AAACACATATTTCAATGAAAAGCAAAGTCCCATAGGAAAATTATGTAATCAGGTCTG  
GAGATGACAAGAGGGAAATATACATAATATGCAGATACACAGACCTTTAAGTACCTC  
CCCTGTCTTTGTCTCCACGTATGCAAACTGCTGTGGACAGAACATTTCCGTTTTCT  
TAAGGGTGTTTCAGCTATTTTGAAGCTGATTCATGACCCCTTCTGCTGTCTTCGAA  
CTATTTTCAGTCCTTA

>Olf19 RF/J

TGAAGTCTGGTTTGCCTAACATTTAATCAGATGTCTTGGGAACAGAGACTCCACAAG  
AAACACATATTTCAATGAAAAGCAAAGTCCCATAGGAAAATTATGTAATCAGGTCTG  
GAGATGACAAGAGGGAAATATACATAATATGCAGATACACAGACCTTTAAGTACCTC  
CCCTGTCTTTGTCTCCACGTATGCAAACTGCTGTGGACAGAACATTTCCGTTTTCT  
TAAGGGTGTTTCAGCTATCTTGGAAGCTGATTCATGACCCCTTCTGCTGTCTTCGAA  
CTATTTTCAGTCCTTA

>Olf19 SEA/GnJ

TGAAGTCTGGTTTGCCTAACATTTAATCAGATGTCTTGGGAACAGAGACTCCACAAG  
AAACACATATTTCAATGAAAAGCAAAGTCCCATAGGAAAATTATGTAATCAGGTCTG  
GAGATGACAAGAGGGAAATATACATAATATGCAGATACACAGACCTTTAAGTACCTC  
CCCTGTCTTTGTCTCCACGTATGCAAACTGCTGTGGACAGAACATTTCCGTTTTCT  
TAAGGGTGTTTCAGCTATCTTGGAAGCTGATTCATGACCCCTTCTGCTGTCTTCGAA  
CTATTTTCAGTCCTTA

>Olf19 SPRET/EiJ

TGAAGTCTGGTTTGCCTAACATTTAATCAGATGTCTTGGGAACAGAGACTCCACAAG  
AAACACATATTTCAATGAAAAGCAAAGTCCCATAGGAAAATTATGTAATCAGGTCTG  
GAGATGACAAGAGGGAAATATACATAATATGAAGATACACAGACCTTTAAGTACCTC  
CCCTGTCTTTGTCTCCACGTATGCAAACTGCTGTGGACAGAACATTTTCGTTTTCT  
TAAGGGTGTTTCAGCTATCTTGGAAGCTGATTCATGACCCCTTCTGCTGTCTTCGAA  
CTATTTTCGGTCCTTA

>Olf19 ST/bJ

TGAAGTCTGGTTTGCCTAACATTTAATCAGATGTCTTGGGAACAGAGACTCCACAAG  
AAACACATATTTCAATGAAAAGCAAAGTCCCATAGGAAAATTATGTAATCAGGTCTG  
GAGATGACAAGAGGGAAATATACATAATATGCAGATACACAGACCTTTAAGTACCTC  
CCCTGTCTTTGTCTCCACGTATGCAAACTGCTGTGGACAGAACATTTCCGTTTTCT

TAAGGGTGTTTCAGCTATCTTGAAGCTGATTCATGACCCCTTCCTGCTGTCTTCGAA  
CTATTTTCAGTCCTTA

>Olfr19 WSB/EiJ

TGAAGTCTGGTTTGCCTAACATTTAATCAGATGTCTTGGGAACAGAGACTCCACAAG  
AAACACATATTTCAATGAAAAGCAAAGTCCCATAGGAAAATTATGTAATCAGGTCTG  
GAGATGACAAGAGGGAAATATACATAATATGCAGATACACAGACCTTTAAGTACCTC  
CCCTGTCTTTGTCTCCACGTATGCAACACTGCTGTGGACAGAACATTTCCGTTTTCT  
TAAGGGTGTTTCAGCTATCTTGAAGCTGATTCATGACCCCTTCCTGCTGTCTTCGAA  
CTATTTTCAGTCCTTA

>Olfr19 ZALENDE/EiJ

TGAAGTCTGGTTTGCCTAACATTTAATCAGATGTCTTGGGAACAGAGACTCCACAAG  
AAACACATATTTCAATGAAAAGCAAAGTCCCATAGGAAAATTATGTAATCAGGTCTG  
GAGATGACAAGAGGGAAATATACATAATATGCAGATACACAGACCTTTAAGTACCTC  
CCCTGTCTTTGTCTCCACGTATGCAACACTGCTGTGGACAGAACATTTCCGTTTTCT  
TAAGGGTGTTTCAGCTATCTTGAAGCTGATTCATGACCCCTTCCTGCTGTCTTCGAA  
CTATTTTCAGTCCTTA

>Olfr49 C57BL/6J

TCTTCTGAGAACAAAGTAAACTTTTAGTCTGAGAGTTGAATGAAGAGGAAAGGGACC  
TTCCTAGATCCCTGTTATTGTTGATGGTAATGAATCTCAAGGGAAGGATAGCTCCAG  
CCAGCAAAAACAGAGAATCTCAGATGAGTCAAATCTGAGCCATGCATCTTTGCACAT  
CTCGAATTCCCATAGAGACCAAAGAGAATGTCTAATACCTCAGGCCTCTTCCCAGTA  
CACAGAAACAAAGGGTCTACCCTGATTGCTGTACCCAGAGTCTTCTGTGGGCACAG  
TGGGACTGGAAGATCA

>Olfr49 Wild\_consensus

TCTTCTGAGAACAAAGTAAACTTTTAGTCTGAGAGTTGAATGAAGAGGAAAGGGACC  
TTCCTAGATCCCTGTTATTGTTGATGGTAATGAATCTCAAGGGAAGGATAGCTCCAG  
CCAGCAAAAACAGAGAATCTCAGATGAGTCAAATCTGAGCCATGCATCTTTGCACAT  
CTCGAATTCCCATAGAGACCAAAGAGAATGTCTAATACCTCAGGCCTCTTCCCAGTA  
CACAGAAACAAAGGGTCTACCCTGATTGCTGTACCCAGAGTCTTCTGTGGGCACAG  
TGGGACTGGAAGATCA

>Olfr49 France

TCTTCTGAGAACAAAGTAAACTTTTAGTCTGAGAGTTGAATGAAGAGGAAAGGGACC  
TTCCTAGATCCCTGTTATTGTTGATGGTAATGAATCTCAAGGGAAGGATAGCTCCAG  
CCAGCAAAAACAGAGAATCTCAGATGAGTCAAATCTGAGCCATGCATCTTTGCACAT  
CTCGAATTCCCATAGAGACCAAAGAGAATGTCTAATACCTCAGGCCTCTTCCCAGTA  
CACAGAAACAAAGGGTCTACCCTGATTGCTGTACCCAGAGTCTTCTGTGGGCACAG  
TGGGACTGGAAGATCA

>Olfr49 Germany

TCTTCTGAGAACAAAGTAAACTTTTAGTCTGAGAGTTGAATGAAGAGGAAAGGGACC  
TTCCTAGATCCCTGTTATTGTTGATGGTAATGAATCTCAAGGGAAGGATAGCTCCAG  
CCAGCAAAAACAGAGAATCTCAGATGAGTCAAATCTGAGCCATGCATCTTTGCACAT  
CTCGAATTCCCATAGAGACCAAAGAGAATGTCTAATACCTCAGGCCTCTTCCCAGTA  
CACAGAAACAAAGGGTCTACCCTGATTGCTGTACCCAGAGTCTTCTGTGGGCACAG  
TGGGACTGGAAGATCA

>Olfr49 Iran

TCTTCTGAGAACAAAGTAAACTTTTAGTCTGAGAGTTGAATGAAGAGGAAAGGGACC  
TTCCTAGATCCCTGTTATTGTTGATGGTAATGAATCTCAAGGGAAGGATAGCTCCAG  
CCAGCAAAAACAGAGAATCTCAGATGAGTCAAATCTGAGCCATGCATCTTTGCACAT  
CTCGAATTCCCATAGAGACCAAAGAGAATGTCTAATACCTCAGGCCTCTTCCCAGTA  
CACAGAAACAAAGGGTCTACCCTGATTGCTGTACCCAGAGTCTTCTGTGGGCACAG

TGGGACTGGAAGATCA

>Olf49 129P2/OlaHsd

TCTTCTGAGAACAAAGTAAACTTTTAGTCTGAGAGTTGAATGAAGAGGAAAGGGACC  
TTCCTAGATCCCTGTTATTGTTGATGGTAATGAATCTCAAGGGAAGGATAGCTCCAG  
CCAGCAAAAACAGAGAATCTCAGATGAGTCAAATCTGAGCCATGCATCTTTGCACAT  
CTCGAATTCCCATAGAGACCAAAGAGAATGTCTAATACCTCAGGCCTCTTCCCAGTA  
CACAGAAACAAAGGGTCTACCCTGATTGCTGTACCCCAGAGTCTTCTGTGGGCACAG  
TGGGACTGGAAGATCA

>Olf49 129S1/SvImJ

TCTTCTGAGAACAAAGTAAACTTTTAGTCTGAGAGTTGAATGAAGAGGAAAGGGACC  
TTCCTAGATCCCTGTTATTGTTGATGGTAATGAATCTCAAGGGAAGGATAGCTCCAG  
CCAGCAAAAACAGAGAATCTCAGATGAGTCAAATCTGAGCCATGCATCTTTGCACAT  
CTCGAATTCCCATAGAGACCAAAGAGAATGTCTAATACCTCAGGCCTCTTCCCAGTA  
CACAGAAACAAAGGGTCTACCCTGATTGCTGTACCCCAGAGTCTTCTGTGGGCACAG  
TGGGACTGGAAGATCA

>Olf49 129S5SvEvBrd

TCTTCTGAGAACAAAGTAAACTTTTAGTCTGAGAGTTGAATGAAGAGGAAAGGGACC  
TTCCTAGATCCCTGTTATTGTTGATGGTAATGAATCTCAAGGGAAGGATAGCTCCAG  
CCAGCAAAAACAGAGAATCTCAGATGAGTCAAATCTGAGCCATGCATCTTTGCACAT  
CTCGAATTCCCATAGAGACCAAAGAGAATGTCTAATACCTCAGGCCTCTTCCCAGTA  
CACAGAAACAAAGGGTCTACCCTGATTGCTGTACCCCAGAGTCTTCTGTGGGCACAG  
TGGGACTGGAAGATCA

>Olf49 A/J

TCTTCTGAGAACAAAGTAAACTTTTAGTCTGAGAGTTGAATGAAGAGGAAAGGGACC  
TTCCTAGATCCCTGTTATTGTTGATGGTAATGAATCTCAAGGGAAGGATAGCTCCAG  
CCAGCAAAAACAGAGAATCTCAGATGAGTCAAATCTGAGCCATGCATCTTTGCACAT  
CTCGAATTCCCATAGAGACCAAAGAGAATGTCTAATACCTCAGGCCTCTTCCCAGTA  
CACAGAAACAAAGGGTCTACCCTGATTGCTGTACCCCAGAGTCTTCTGTGGGCACAG  
TGGGACTGGAAGATCA

>Olf49 AKR/J

TCTTCTGAGAACAAAGTAAACTTTTAGTCTGAGAGTTGAATGAAGAGGAAAGGGACC  
TTCCTAGATCCCTGTTATTGTTGATGGTAATGAATCTCAAGGGAAGGATAGCTCCAG  
CCAGCAAAAACAGAGAATCTCAGATGAGTCAAATCTGAGCCATGCATCTTTGCACAT  
CTCGAATTCCCATAGAGACCAAAGAGAATGTCTAATACCTCAGGCCTCTTCCCAGTA  
CACAGAAACAAAGGGTCTACCCTGATTGCTGTACCCCAGAGTCTTCTGTGGGCACAG  
TGGGACTGGAAGATCA

>Olf49 BALB/cJ

TCTTCTGAGAACAAAGTAAACTTTTAGTCTGAGAGTTGAATGAAGAGGAAAGGGACC  
TTCCTAGATCCCTGTTATTGTTGATGGTAATGAATCTCAAGGGAAGGATAGCTCCAG  
CCAGCAAAAACAGAGAATCTCAGATGAGTCAAATCTGAGCCATGCATCTTTGCACAT  
CTCGAATTCCCATAGAGACCAAAGAGAATGTCTAATACCTCAGGCCTCTTCCCAGTA  
CACAGAAACAAAGGGTCTACCCTGATTGCTGTACCCCAGAGTCTTCTGTGGGCACAG  
TGGGACTGGAAGATCA

>Olf49 BTBR/T+\_Itpr3tf/J

TCTTCTGAGAACAAAGTAAACTTTTAGTCTGAGAGTTGAATGAAGAGGAAAGGGACC  
TTCCTAGATCCCTGTTATTGTTGATGGTAATGAATCTCAAGGGAAGGATAGCTCCAG  
CCAGCAAAAACAGAGAATCTCAGATGAGTCAAATCTGAGCCATGCATCTTTGCACAT  
CTCGAATTCCCATAGAGACCAAAGAGAATGTCTAATACCTCAGGCCTCTTCCCAGTA  
CACAGAAACAAAGGGTCTACCCTGATTGCTGTACCCCAGAGTCTTCTGTGGGCACAG  
TGGGACTGGAAGATCA

>Olf49 BUB/BnJ

TCTTCTGAGAACAAAGTAAACTTTTAGTCTGAGAGTTGAATGAAGAGGAAAGGGACC  
TTCCTAGATCCCTGTTATTGTTGATGGTAATGAATCTCAAGGGAAGGATAGCTCCAG  
CCAGCAAAAACAGAGAATCTCAGATGAGTCAAATCTGAGCCATGCATCTTTGCACAT  
CTCGAATTCCCATAGAGACCAAAGAGAATGTCTAATACCTCAGGCCTCTTCCCAGTA  
CACAGAAACAAAGGGTCTACCCTGATTGCTGTACCCCAGAGTCTTCTGTGGGCACAG  
TGGGACTGGAAGATCA

>O1fr49 C3H/HeH

TCTTCTGAGAACAAAGTAAACTTTTAGTCTGAGAGTTGAATGAAGAGGAAAGGGACC  
TTCCTAGATCCCTGTTATTGTTGATGGTAATGAATCTCAAGGGAAGGATAGCTCCAG  
CCAGCAAAAACAGAGAATCTCAGATGAGTCAAATCTGAGCCATGCATCTTTGCACAT  
CTCGAATTCCCATAGAGACCAAAGAGAATGTCTAATACCTCAGGCCTCTTCCCAGTA  
CACAGAAACAAAGGGTCTACCCTGATTGCTGTACCCCAGAGTCTTCTGTGGGCACAG  
TGGGACTGGAAGATCA

>O1fr49 C3H/HeJ

TCTTCTGAGAACAAAGTAAACTTTTAGTCTGAGAGTTGAATGAAGAGGAAAGGGACC  
TTCCTAGATCCCTGTTATTGTTGATGGTAATGAATCTCAAGGGAAGGATAGCTCCAG  
CCAGCAAAAACAGAGAATCTCAGATGAGTCAAATCTGAGCCATGCATCTTTGCACAT  
CTCGAATTCCCATAGAGACCAAAGAGAATGTCTAATACCTCAGGCCTCTTCCCAGTA  
CACAGAAACAAAGGGTCTACCCTGATTGCTGTACCCCAGAGTCTTCTGTGGGCACAG  
TGGGACTGGAAGATCA

>O1fr49 C57BL/10J

TCTTCTGAGAACAAAGTAAACTTTTAGTCTGAGAGTTGAATGAAGAGGAAAGGGACC  
TTCCTAGATCCCTGTTATTGTTGATGGTAATGAATCTCAAGGGAAGGATAGCTCCAG  
CCAGCAAAAACAGAGAATCTCAGATGAGTCAAATCTGAGCCATGCATCTTTGCACAT  
CTCGAATTCCCATAGAGACCAAAGAGAATGTCTAATACCTCAGGCCTCTTCCCAGTA  
CACAGAAACAAAGGGTCTACCCTGATTGCTGTACCCCAGAGTCTTCTGTGGGCACAG  
TGGGACTGGAAGATCA

>O1fr49 C57BL/6NJ

TCTTCTGAGAACAAAGTAAACTTTTAGTCTGAGAGTTGAATGAAGAGGAAAGGGACC  
TTCCTAGATCCCTGTTATTGTTGATGGTAATGAATCTCAAGGGAAGGATAGCTCCAG  
CCAGCAAAAACAGAGAATCTCAGATGAGTCAAATCTGAGCCATGCATCTTTGCACAT  
CTCGAATTCCCATAGAGACCAAAGAGAATGTCTAATACCTCAGGCCTCTTCCCAGTA  
CACAGAAACAAAGGGTCTACCCTGATTGCTGTACCCCAGAGTCTTCTGTGGGCACAG  
TGGGACTGGAAGATCA

>O1fr49 C57BR/cdJ

TCTTCTGAGAACAAAGTAAACTTTTAGTCTGAGAGTTGAATGAAGAGGAAAGGGACC  
TTCCTAGATCCCTGTTATTGTTGATGGTAATGAATCTCAAGGGAAGGATAGCTCCAG  
CCAGCAAAAACAGAGAATCTCAGATGAGTCAAATCTGAGCCATGCATCTTTGCACAT  
CTCGAATTCCCATAGAGACCAAAGAGAATGTCTAATACCTCAGGCCTCTTCCCAGTA  
CACAGAAACAAAGGGTCTACCCTGATTGCTGTACCCCAGAGTCTTCTGTGGGCACAG  
TGGGACTGGAAGATCA

>O1fr49 C57L/J

TCTTCTGAGAACAAAGTAAACTTTTAGTCTGAGAGTTGAATGAAGAGGAAAGGGACC  
TTCCTAGATCCCTGTTATTGTTGATGGTAATGAATCTCAAGGGAAGGATAGCTCCAG  
CCAGCAAAAACAGAGAATCTCAGATGAGTCAAATCTGAGCCATGCATCTTTGCACAT  
CTCGAATTCCCATAGAGACCAAAGAGAATGTCTAATACCTCAGGCCTCTTCCCAGTA  
CACAGAAACAAAGGGTCTACCCTGATTGCTGTACCCCAGAGTCTTCTGTGGGCACAG  
TGGGACTGGAAGATCA

>O1fr49 C58/J

TCTTCTGAGAACAAAGTAAACTTTTAGTCTGAGAGTTGAATGAAGAGGAAAGGGACC  
TTCCTAGATCCCTGTTATTGTTGATGGTAATGAATCTCAAGGGAAGGATAGCTCCAG

CCAGCAAAAACAGAGAATCTCAGATGAGTCAAATCTGAGCCATGCATCTTTGCACAT  
CTCGAATTCCCATAGAGACCAAAGAGAATGTCTAATACCTCAGGCCTCTTCCCAGTA  
CACAGAAACAAAGGGTCTACCCTGATTGCTGTACCCCAGAGTCTTCTGTGGGCACAG  
TGGGACTGGAAGATCA

>Olf49 CAST/EiJ

TCTTCTGAGAACAAGTAACTTTTAGTCTGAGAGTTGAATGAAGAGGAAAGGGACC  
TTCCTAGATCCCTGTTATTGTTGATGGTAATGAATCTCAAGGGAAGGATAGCTCCAG  
CCAGCAAAAACAGAGAATCTCAGATGAGTCAAATCTGAGCCATGCATCTTTGCACAT  
CTCGAATTCCCATAGAGACCAAAGAGAATGTCTAATACCTCAGGCCTCTTCCCAGTA  
CACAGAAACAAAGGGTCTACCCTGATTGCTGTACCCCAGAGTCTTCTGTGGGCACAG  
TGGGACTGGAAGATCA

>Olf49 CBA/J

TCTTCTGAGAACAAGTAACTTTTAGTCTGAGAGTTGAATGAAGAGGAAAGGGACC  
TTCCTAGATCCCTGTTATTGTTGATGGTAATGAATCTCAAGGGAAGGATAGCTCCAG  
CCAGCAAAAACAGAGAATCTCAGATGAGTCAAATCTGAGCCATGCATCTTTGCACAT  
CTCGAATTCCCATAGAGACCAAAGAGAATGTCTAATACCTCAGGCCTCTTCCCAGTA  
CACAGAAACAAAGGGTCTACCCTGATTGCTGTACCCCAGAGTCTTCTGTGGGCACAG  
TGGGACTGGAAGATCA

>Olf49 DBA/1J

TCTTCTGAGAACAAGTAACTTTTAGTCTGAGAGTTGAATGAAGAGGAAAGGGACC  
TTCCTAGATCCCTGTTATTGTTGATGGTAATGAATCTCAAGGGAAGGATAGCTCCAG  
CCAGCAAAAACAGAGAATCTCAGATGAGTCAAATCTGAGCCATGCATCTTTGCACAT  
CTCGAATTCCCATAGAGACCAAAGAGAATGTCTAATACCTCAGGCCTCTTCCCAGTA  
CACAGAAACAAAGGGTCTACCCTGATTGCTGTACCCCAGAGTCTTCTGTGGGCACAG  
TGGGACTGGAAGATCA

>Olf49 DBA/2J

TCTTCTGAGAACAAGTAACTTTTAGTCTGAGAGTTGAATGAAGAGGAAAGGGACC  
TTCCTAGATCCCTGTTATTGTTGATGGTAATGAATCTCAAGGGAAGGATAGCTCCAG  
CCAGCAAAAACAGAGAATCTCAGATGAGTCAAATCTGAGCCATGCATCTTTGCACAT  
CTCGAATTCCCATAGAGACCAAAGAGAATGTCTAATACCTCAGGCCTCTTCCCAGTA  
CACAGAAACAAAGGGTCTACCCTGATTGCTGTACCCCAGAGTCTTCTGTGGGCACAG  
TGGGACTGGAAGATCA

>Olf49 FVB/NJ

TCTTCTGAGAACAAGTAACTTTTAGTCTGAGAGTTGAATGAAGAGGAAAGGGACC  
TTCCTAGATCCCTGTTATTGTTGATGGTAATGAATCTCAAGGGAAGGATAGCTCCAG  
CCAGCAAAAACAGAGAATCTCAGATGAGTCAAATCTGAGCCATGCATCTTTGCACAT  
CTCGAATTCCCATAGAGACCAAAGAGAATGTCTAATACCTCAGGCCTCTTCCCAGTA  
CACAGAAACAAAGGGTCTACCCTGATTGCTGTACCCCAGAGTCTTCTGTGGGCACAG  
TGGGACTGGAAGATCA

>Olf49 I/LnJ

TCTTCTGAGAACAAGTAACTTTTAGTCTGAGAGTTGAATGAAGAGGAAAGGGACC  
TTCCTAGATCCCTGTTATTGTTGATGGTAATGAATCTCAAGGGAAGGATAGCTCCAG  
CCAGCAAAAACAGAGAATCTCAGATGAGTCAAATCTGAGCCATGCATCTTTGCACAT  
CTCGAATTCCCATAGAGACCAAAGAGAATGTCTAATACCTCAGGCCTCTTCCCAGTA  
CACAGAAACAAAGGGTCTACCCTGATTGCTGTACCCCAGAGTCTTCTGTGGGCACAG  
TGGGACTGGAAGATCA

>Olf49 KK/HiJ

TCTTCTGAGAACAAGTAACTTTTAGTCTGAGAGTTGAATGAAGAGGAAAGGGACC  
TTCCTAGATCCCTGTTATTGTTGATGGTAATGAATCTCAAGGGAAGGATAGCTCCAG  
CCAGCAAAAACAGAGAATCTCAGATGAGTCAAATCTGAGCCATGCATCTTTGCACAT  
CTCGAATTCCCATAGAGACCAAAGAGAATGTCTAATACCTCAGGCCTCTTCCCAGTA

CACAGAAACAAAGGGTCTACCCTGATTGCTGTACCCCAGAGTCTTCTGTGGGCACAG  
TGGGACTGGAAGATCA

>Olf49 LEWES/EiJ

TCTTCTGAGAACAAAGTAAACTTTTAGTCTGAGAGTTGAATGAAGAGGAAAGGGACC  
TTCCTAGATCCCTGTTATTGTTGATGGTAATGAATCTCAAGGGAAGGATAGCTCCAG  
CCAGCAAAAACAGAGAATCTCAGATGAGTCAAATCTGAGCCATGCATCTTTGCACAT  
CTCGAATTCCCATAGAGACCAAAGAGAATGTCTAATACCTCAGGCCTCTTCCCAGTA  
CACAGAAACAAAGGGTCTACCCTGATTGCTGTACCCCAGAGTCTTCTGTGGGCACAG  
TGGGACTGGAAGATCA

>Olf49 LP/J

TCTTCTGAGAACAAAGTAAACTTTTAGTCTGAGAGTTGAATGAAGAGGAAAGGGACC  
TTCCTAGATCCCTGTTATTGTTGATGGTAATGAATCTCAAGGGAAGGATAGCTCCAG  
CCAGCAAAAACAGAGAATCTCAGATGAGTCAAATCTGAGCCATGCATCTTTGCACAT  
CTCGAATTCCCATAGAGACCAAAGAGAATGTCTAATACCTCAGGCCTCTTCCCAGTA  
CACAGAAACAAAGGGTCTACCCTGATTGCTGTACCCCAGAGTCTTCTGTGGGCACAG  
TGGGACTGGAAGATCA

>Olf49 MOL/EiJ

TCTTCTGAGAACAAAGTAAACTTTTAGTCTGAGAGTTGAATGAAGAGGAAAGGGACC  
TTCCTAGATCCCTGTTATTGTTGATGGTAATGAATCTCAAGGGAAGGATAGCTCCAG  
CCAGCAAAAACAGAGAATCTCAGATGAGTCAAATCTGAGCCATGCATCTTTGCACAT  
CTCGAATTCCCATAGAGACCAAAGAGAATGTCTAATACCTCAGGCCTCTTCCCAGTA  
CACAGAAACAAAGGGTCTACCCTGATTGCTGTACCCCAGAGTCTTCTGTGGGCACAG  
TGGGACTGGAAGATCA

>Olf49 NOD/ShiLtJ

TCTTCTGAGAACAAAGTAAACTTTTAGTCTGAGAGTTGAATGAAGAGGAAAGGGACC  
TTCCTAGATCCCTGTTATTGTTGATGGTAATGAATCTCAAGGGAAGGATAGCTCCAG  
CCAGCAAAAACAGAGAATCTCAGATGAGTCAAATCTGAGCCATGCATCTTTGCACAT  
CTCGAATTCCCATAGAGACCAAAGAGAATGTCTAATACCTCAGGCCTCTTCCCAGTA  
CACAGAAACAAAGGGTCTACCCTGATTGCTGTACCCCAGAGTCTTCTGTGGGCACAG  
TGGGACTGGAAGATCA

>Olf49 NZB/B1NJ

TCTTCTGAGAACAAAGTAAACTTTTAGTCTGAGAGTTGAATGAAGAGGAAAGGGACC  
TTCCTAGATCCCTGTTATTGTTGATGGTAATGAATCTCAAGGGAAGGATAGCTCCAG  
CCAGCAAAAACAGAGAATCTCAGATGAGTCAAATCTGAGCCATGCATCTTTGCACAT  
CTCGAATTCCCATAGAGACCAAAGAGAATGTCTAATACCTCAGGCCTCTTCCCAGTA  
CACAGAAACAAAGGGTCTACCCTGATTGCTGTACCCCAGAGTCTTCTGTGGGCACAG  
TGGGACTGGAAGATCA

>Olf49 NZO/H1LtJ

TCTTCTGAGAACAAAGTAAACTTTTAGTCTGAGAGTTGAATGAAGAGGAAAGGGACC  
TTCCTAGATCCCTGTTATTGTTGATGGTAATGAATCTCAAGGGAAGGATAGCTCCAG  
CCAGCAAAAACAGAGAATCTCAGATGAGTCAAATCTGAGCCATGCATCTTTGCACAT  
CTCGAATTCCCATAGAGACCAAAGAGAATGTCTAATACCTCAGGCCTCTTCCCAGTA  
CACAGAAACAAAGGGTCTACCCTGATTGCTGTACCCCAGAGTCTTCTGTGGGCACAG  
TGGGACTGGAAGATCA

>Olf49 NZW/LacJ

TCTTCTGAGAACAAAGTAAACTTTTAGTCTGAGAGTTGAATGAAGAGGAAAGGGACC  
TTCCTAGATCCCTGTTATTGTTGATGGTAATGAATCTCAAGGGAAGGATAGCTCCAG  
CCAGCAAAAACAGAGAATCTCAGATGAGTCAAATCTGAGCCATGCATCTTTGCACAT  
CTCGAATTCCCATAGAGACCAAAGAGAATGTCTAATACCTCAGGCCTCTTCCCAGTA  
CACAGAAACAAAGGGTCTACCCTGATTGCTGTACCCCAGAGTCTTCTGTGGGCACAG  
TGGGACTGGAAGATCA



>Olf49 PWK/PhJ

TCTTCTGAGAACAAAGTAAACTTTTAGTCTGAGAGTTGAATGAAGAGGAAAGGGACC  
TTCCTAGATCCCTGTTATTGTTGATGGTAATGAATCTCAAGGGAAGGATAGCTCCAG  
CCAGCAAAAACAGAGAATCTCAGATGAGTCAAATCTGAGCCATGCATCTTTGCACAT  
CTCGAATTCCCATAGAGACCAAAGAGAATGTCTAATACCTCAGGCCTCTTCCCAGTA  
CACAGAAACAAAGGGTCTACCCTGATTGCTGTACCCCAGAGTCTTCTGTGGGCACAG  
TGGGACTGGAAGATCA

>Olf49 RF/J

TCTTCTGAGAACAAAGTAAACTTTTAGTCTGAGAGTTGAATGAAGAGGAAAGGGACC  
TTCCTAGATCCCTGTTATTGTTGATGGTAATGAATCTCAAGGGAAGGATAGCTCCAG  
CCAGCAAAAACAGAGAATCTCAGATGAGTCAAATCTGAGCCATGCATCTTTGCACAT  
CTCGAATTCCCATAGAGACCAAAGAGAATGTCTAATACCTCAGGCCTCTTCCCAGTA  
CACAGAAACAAAGGGTCTACCCTGATTGCTGTACCCCAGAGTCTTCTGTGGGCACAG  
TGGGACTGGAAGATCA

>Olf49 SEA/GnJ

TCTTCTGAGAACAAAGTAAACTTTTAGTCTGAGAGTTGAATGAAGAGGAAAGGGACC  
TTCCTAGATCCCTGTTATTGTTGATGGTAATGAATCTCAAGGGAAGGATAGCTCCAG  
CCAGCAAAAACAGAGAATCTCAGATGAGTCAAATCTGAGCCATGCATCTTTGCACAT  
CTCGAATTCCCATAGAGACCAAAGAGAATGTCTAATACCTCAGGCCTCTTCCCAGTA  
CACAGAAACAAAGGGTCTACCCTGATTGCTGTACCCCAGAGTCTTCTGTGGGCACAG  
TGGGACTGGAAGATCA

>Olf49 SPRET/EiJ

TCTTCTGAGAACAAAGTAAACTTTTAGTCTGAGAGTTGAATGAAGAGGAAAGGGACC  
TTCCTAGATCCCTGTTATTGTTGATGGTAATGAATCTCAAGGGAAGGATAGCTCCAG  
CCAGCAAAAACAGAGAATCTCAGATGAGTCAAATCTGAGCCATGCATCTTTGCACAT  
CTCGAATTCCCATAGAGACCAAAGAATGTCTAATACCTCAGGCCTCTTCCCAGTA  
CACAGAAACAAAGGGTCTACCCTGATTGCTGTACCCCTTCTGTGGGCACAGTGGGAC  
TGGGACTGGAAGATCA

>Olf49 ST/bJ

TCTTCTGAGAACAAAGTAAACTTTTAGTCTGAGAGTTGAATGAAGAGGAAAGGGACC  
TTCCTAGATCCCTGTTATTGTTGATGGTAATGAATCTCAAGGGAAGGATAGCTCCAG  
CCAGCAAAAACAGAGAATCTCAGATGAGTCAAATCTGAGCCATGCATCTTTGCACAT  
CTCGAATTCCCATAGAGACCAAAGAGAATGTCTAATACCTCAGGCCTCTTCCCAGTA  
CACAGAAACAAAGGGTCTACCCTGATTGCTGTACCCCAGAGTCTTCTGTGGGCACAG  
TGGGACTGGAAGATCA

>Olf49 WSB/EiJ

TCTTCTGAGAACAAAGTAAACTTTTAGTCTGAGAGTTGAATGAAGAGGAAAGGGACC  
TTCCTAGATCCCTGTTATTGTTGATGGTAATGAATCTCAAGGGAAGGATAGCTCCAG  
CCAGCAAAAACAGAGAATCTCAGATGAGTCAAATCTGAGCCATGCATCTTTGCACAT  
CTCGAATTCCCATAGAGACCAAAGAGAATGTCTAATACCTCAGGCCTCTTCCCAGTA  
CACAGAAACAAAGGGTCTACCCTGATTGCTGTACCCCAGAGTCTTCTGTGGGCACAG  
TGGGACTGGAAGATCA

>Olf49 ZALENDE/EiJ

TCTTCTGAGAACAAAGTAAACTTTTAGTCTGAGAGTTGAATGAAGAGGAAAGGGACC  
TTCCTAGATCCCTGTTATTGTTGATGGTAATGAATCTCAAGGGAAGGATAGCTCCAG  
CCAGCAAAAACAGAGAATCTCAGATGAGTCAAATCTGAGCCATGCATCTTTGCACAT  
CTCGAATTCCCATAGAGACCAAAGAGAATGTCTAATACCTCAGGCCTCTTCCCAGTA  
CACAGAAACAAAGGGTCTACCCTGATTGCTGTACCCCAGAGTCTTCTGTGGGCACAG  
TGGGACTGGAAGATCA

>Olf266 C57BL/6J

TGTTTGACATCATTGGGGAGGTTACAACCTTACTCACAAAGGGACTAACTTTACAC  
AATGGAATAGATTGAGAAACAGGGTCAATATTCCTGCGCTTCCAGATTCACAGTC  
CTTAGTTTTTAATGAATGTACAGGGAGGTGTATTTCTGGATAAAAAGCAAGATTCCAC  
ACATCTAATGTTATTATTTAAATCCAGGGTAAGTGGACATGTTTTATTCTATGTGGT  
CTGGCTCTGCAAATTAGGAATGGACCTCTCCAAGTCTCTGATGGGCAAAGCGGATCT  
GTTCTGGTAATATACT

>Olf266 Wild\_consensus

TGTTTGACATCATTGGGGAGGTTACAACCTTACTCACAAAGGGACTAACTTTACAC  
AATGGAATAGATTGAGAAACAGGGTCAATATTCCTGCGCTTCCAGATTCACAGTC  
CTTAGTTTTTAATGAATGTACAGGGAGGTGTATTTCTGGATAAAAAGCAAGATTCCAC  
ACATCTAATGTTATTATTTAAATCCAGGGTAAGTGGACATGTTTTATTCTATGTGGT  
CTGGCTCTGCAAATTAGGAATGGACCTCTCCAAGTCTCTGATGGGCAAAGCGGATCT  
GTTCTGGTAATATACT

>Olf266 France

TGTTTGACATCATTGGGGAGGTTACAACCTTACTCACAAAGGGACTAACTTTACAC  
AATGGAATAGATTGAGAAACAGGGTCAATATTCCTGCGCTTCCAGATTCACAGTC  
CTTAGTTTTTAATGAATGTACAGGGAGGTGTATTTCTGGATAAAAAGCAAGATTCCAC  
ACATCTAATGTTATTATTTAAATCCAGGGTAAGTGGACATGTTTTATTCTATGTGGT  
CTGGCTCTGCAAATTAGGAATGGACCTCTCCAAGTCTCTGATGGGCAAAGCGGATCT  
GTTCTGGTAATATACT

>Olf266 Germany

TGTTTGACATCATTGGGGAGGTTACAACCTTACTCACAAAGGGACTAACTTTACAC  
AATGGAATAGATTGAGAAACAGGGTCAATATTCCTGCGCTTCCAGATTCACAGTC  
CTTAGTTTTTAATGAATGTACAGGGAGGTGTATTTCTGGATAAAAAGCAAGATTCCAC  
ACATCTAATGTTATTATTTAAATCCAGGGTAAGTGGACATGTTTTATTCTATGTGGC  
CTGGCTCTGCAAAGTAGGAATGGACCTCTCCAAGTCTCTGATGGGCAAAGCGGATCT  
GTTCTGGTAATATACT

>Olf266 Iran

TGTTTGACATCATTGGGGAGGTTACAACCTTACTCACAAAGGGACTAACTTTACAC  
AATGGAATAGATTGAGAAACAGGGTCAATATTCCTGCGCTTCCAGATTCACAGTC  
CTTAGTTTTTAATGAATGTACAGGGAGGTGTATTTCTGGATAAAAAGCAAGATTCCAC  
ACATCTAATGTTATTATTTAAATCCAGGGTAAGTGGACATGTTTTATTCTATGTGGT  
CTGGCTCTGCAAATTAGGAATGGACCTCTCCAAGTCTCTGATGGGCAAAGCGGATCT  
GTTCTGGTAATATACT

>Olf266 129P2/OlaHsd

TGTTTGACATCATTGGGGAGGTTACAACCTTACTCACAAAGGGACTAACTTTACAC  
AATGGAATAGATTGAGAAACAGGGTCAATATTCCTGCGCTTCCAGATTCACAGTC  
CTTAGTTTTTAATGAATGTACAGGGAGGTGTATTTCTGGATAAAAAGCAAGATTCCAC  
ACATCTAATGTTATTATTTAAATCCAGGGTAAGTGGACATGTTTTATTCTATGTGGT  
CTGGCTCTGCAAATTAGGAATGGACCTCTCCAAGTCTCTGATGGGCAAAGCGGATCT  
GTTCTGGTAATATACT

>Olf266 129S1/SvImJ

TGTTTGACATCATTGGGGAGGTTACAACCTTACTCACAAAGGGACTAACTTTACAC  
AATGGAATAGATTGAGAAACAGGGTCAATATTCCTGCGCTTCCAGATTCACAGTC  
CTTAGTTTTTAATGAATGTACAGGGAGGTGTATTTCTGGATAAAAAGCAAGATTCCAC  
ACATCTAATGTTATTATTTAAATCCAGGGTAAGTGGACATGTTTTATTCTATGTGGT  
CTGGCTCTGCAAATTAGGAATGGACCTCTCCAAGTCTCTGATGGGCAAAGCGGATCT  
GTTCTGGTAATATACT

>Olf266 129S5SvEvBrd

TGTTTGACATCATTGGGGAGGTTACAACCTTACTCACAAAGGGACTAACTTTACAC  
AATGGAATAGATTGAGAAACAGGGTCAATATTCCTGCGCTTCCAGATTCACAGTC

CTTAGTTTTTAATGAATGTACAGGGAGGTGTATTTCTGGATAAAAAGCAAGATTCCAC  
ACATCTAATGTTATTATTTAAATCCAGGGTAAGTGGACATGTTTTATTCTATGTGGT  
CTGGCTCTGCAAATTAGGAATGGACCTCTCCAAGTCTCTGATGGGCAAAGCGGATCT  
GTTCTGGTAATATACT

>Olf<sub>r</sub>266 A/J

TGTTTGACATCATTGGGGAGGTTACAACCTTACTCACAAAGGGACTAAACTTTACAC  
AATGGAATAGATTGAGAAACAGGGTCAATATTCCTACTGGCCTTCCAGATTCACAGTC  
CTTAGTTTTTAATGAATGTACAGGGAGGTGTATTTCTGGATAAAAAGCAAGATTCCAC  
ACATCTAATGTTATTATTTAAATCCAGGGTAAGTGGACATGTTTTATTCTATGTGGT  
CTGGCTCTGCAAATTAGGAATGGACCTCTCCAAGTCTCTGATGGGCAAAGCGGATCT  
GTTCTGGTAATATACT

>Olf<sub>r</sub>266 AKR/J

TGTTTGACATCATTGGGGAGGTTACAACCTTACTCACAAAGGGACTAAACTTTACAC  
AATGGAATAGATTGAGAAACAGGGTCAATATTCCTACTGGCCTTCCAGATTCACAGTC  
CTTAGTTTTTAATGAATGTACAGGGAGGTGTATTTCTGGATAAAAAGCAAGATTCCAC  
ACATCTAATGTTATTATTTAAATCCAGGGTAAGTGGACATGTTTTATTCTATGTGGT  
CTGGCTCTGCAAATTAGGAATGGACCTCTCCAAGTCTCTGATGGGCAAAGCGGATCT  
GTTCTGGTAATATACT

>Olf<sub>r</sub>266 BALB/cJ

TGTTTGACATCATTGGGGAGGTTACAACCTTACTCACAAAGGGACTAAACTTTACAC  
AATGGAATAGATTGAGAAACAGGGTCAATATTCCTACTGGCCTTCCAGATTCACAGTC  
CTTAGTTTTTAATGAATGTACAGGGAGGTGTATTTCTGGATAAAAAGCAAGATTCCAC  
ACATCTAATGTTATTATTTAAATCCAGGGTAAGTGGACATGTTTTATTCTATGTGGT  
CTGGCTCTGCAAATTAGGAATGGACCTCTCCAAGTCTCTGATGGGCAAAGCGGATCT  
GTTCTGGTAATATACT

>Olf<sub>r</sub>266 BTBR/T<sub>+</sub>\_Itpr3tf/J

TGTTTGACATCATTGGGGAGGTTACAACCTTACTCACAAAGGGACTAAACTTTACAC  
AATGGAATAGATTGAGAAACAGGGTCAATATTCCTACTGGCCTTCCAGATTCACAGTC  
CTTAGTTTTTAATGAATGTACAGGGAGGTGTATTTCTGGATAAAAAGCAAGATTCCAC  
ACATCTAATGTTATTATTTAAATCCAGGGTAAGTGGACATGTTTTATTCTATGTGGT  
CTGGCTCTGCAAATTAGGAATGGACCTCTCCAAGTCTCTGATGGGCAAAGCGGATCT  
GTTCTGGTAATATACT

>Olf<sub>r</sub>266 BUB/BnJ

TGTTTGACATCATTGGGGAGGTTACAACCTTACTCACAAAGGGACTAAACTTTACAC  
AATGGAATAGATTGAGAAACAGGGTCAATATTCCTACTGGCCTTCCAGATTCACAGTC  
CTTAGTTTTTAATGAATGTACAGGGAGGTGTATTTCTGGATAAAAAGCAAGATTCCAC  
ACATCTAATGTTATTATTTAAATCCAGGGTAAGTGGACATGTTTTATTCTATGTGGT  
CTGGCTCTGCAAATTAGGAATGGACCTCTCCAAGTCTCTGATGGGCAAAGCGGATCT  
GTTCTGGTAATATACT

>Olf<sub>r</sub>266 C3H/HeH

TGTTTGACATCATTGGGGAGGTTACAACCTTACTCACAAAGGGACTAAACTTTACAC  
AATGGAATAGATTGAGAAACAGGGTCAATATTCCTACTGGCCTTCCAGATTCACAGTC  
CTTAGTTTTTAATGAATGTACAGGGAGGTGTATTTCTGGATAAAAAGCAAGATTCCAC  
ACATCTAATGTTATTATTTAAATCCAGGGTAAGTGGACATGTTTTATTCTATGTGGT  
CTGGCTCTGCAAATTAGGAATGGACCTCTCCAAGTCTCTGATGGGCAAAGCGGATCT  
GTTCTGGTAATATACT

>Olf<sub>r</sub>266 C3H/HeJ

TGTTTGACATCATTGGGGAGGTTACAACCTTACTCACAAAGGGACTAAACTTTACAC  
AATGGAATAGATTGAGAAACAGGGTCAATATTCCTACTGGCCTTCCAGATTCACAGTC  
CTTAGTTTTTAATGAATGTACAGGGAGGTGTATTTCTGGATAAAAAGCAAGATTCCAC  
ACATCTAATGTTATTATTTAAATCCAGGGTAAGTGGACATGTTTTATTCTATGTGGT

CTGGCTCTGCAAATTAGGAATGGACCTCTCCAAGTCTCTGATGGGCAAAGCGGATCT  
GTTCTGGTAATATACT

>O1fr266 C57BL/10J

TGTTTGACATCATTGGGGAGGTTACAACCTTACTCACAAAGGGACTAACTTTACAC  
AATGGAATAGATTGAGAAACAGGGTCAATATTCCTACTGGCCTTCCAGATTCACAGTC  
CTTAGTTTTTAAATGAATGTACAGGGAGGTGTATTTCTGGATAAAAAGCAAGATTCCAC  
ACATCTAATGTTATTATTTAAATCCAGGGTAAGTGGACATGTTTTATTCTATGTGGT  
CTGGCTCTGCAAATTAGGAATGGACCTCTCCAAGTCTCTGATGGGCAAAGCGGATCT  
GTTCTGGTAATATACT

>O1fr266 C57BL/6NJ

TGTTTGACATCATTGGGGAGGTTACAACCTTACTCACAAAGGGACTAACTTTACAC  
AATGGAATAGATTGAGAAACAGGGTCAATATTCCTACTGGCCTTCCAGATTCACAGTC  
CTTAGTTTTTAAATGAATGTACAGGGAGGTGTATTTCTGGATAAAAAGCAAGATTCCAC  
ACATCTAATGTTATTATTTAAATCCAGGGTAAGTGGACATGTTTTATTCTATGTGGT  
CTGGCTCTGCAAATTAGGAATGGACCTCTCCAAGTCTCTGATGGGCAAAGCGGATCT  
GTTCTGGTAATATACT

>O1fr266 C57BR/cdJ

TGTTTGACATCATTGGGGAGGTTACAACCTTACTCACAAAGGGACTAACTTTACAC  
AATGGAATAGATTGAGAAACAGGGTCAATATTCCTACTGGCCTTCCAGATTCACAGTC  
CTTAGTTTTTAAATGAATGTACAGGGAGGTGTATTTCTGGATAAAAAGCAAGATTCCAC  
ACATCTAATGTTATTATTTAAATCCAGGGTAAGTGGACATGTTTTATTCTATGTGGT  
CTGGCTCTGCAAATTAGGAATGGACCTCTCCAAGTCTCTGATGGGCAAAGCGGATCT  
GTTCTGGTAATATACT

>O1fr266 C57L/J

TGTTTGACATCATTGGGGAGGTTACAACCTTACTCACAAAGGGACTAACTTTACAC  
AATGGAATAGATTGAGAAACAGGGTCAATATTCCTACTGGCCTTCCAGATTCACAGTC  
CTTAGTTTTTAAATGAATGTACAGGGAGGTGTATTTCTGGATAAAAAGCAAGATTCCAC  
ACATCTAATGTTATTATTTAAATCCAGGGTAAGTGGACATGTTTTATTCTATGTGGT  
CTGGCTCTGCAAATTAGGAATGGACCTCTCCAAGTCTCTGATGGGCAAAGCGGATCT  
GTTCTGGTAATATACT

>O1fr266 C58/J

TGTTTGACATCATTGGGGAGGTTACAACCTTACTCACAAAGGGACTAACTTTACAC  
AATGGAATAGATTGAGAAACAGGGTCAATATTCCTACTGGCCTTCCAGATTCACAGTC  
CTTAGTTTTTAAATGAATGTACAGGGAGGTGTATTTCTGGATAAAAAGCAAGATTCCAC  
ACATCTAATGTTATTATTTAAATCCAGGGTAAGTGGACATGTTTTATTCTATGTGGT  
CTGGCTCTGCAAATTAGGAATGGACCTCTCCAAGTCTCTGATGGGCAAAGCGGATCT  
GTTCTGGTAATATACT

>O1fr266 CAST/EiJ

TGTTTGACATCATTGGGGAGGTTACAACCTTACTCACAAAGGGACTAACTTTACAC  
AATGGAATAGATTGAGAAACAGGGTCAATATTCCTACTGGCCTTCCAGATTCACAGTC  
CTTAGTTTTTAAATGAATGTACAGGGAGGTGTATTTCTGGATAAAAAGCAAGATTCCAC  
ACATCTAATGTTATTATTTAAATCCAGGGTAAGTGGACATGTTTTATTCTATGTGGT  
CTGGCTCTGCAAATTAGGAATGGACCTCTCCAAGTCTCTGATGGGCAAAGCGGATCT  
GTTCTGGTAATATACT

>O1fr266 CBA/J

TGTTTGACATCATTGGGGAGGTTACAACCTTACTCACAAAGGGACTAACTTTACAC  
AATGGAATAGATTGAGAAACAGGGTCAATATTCCTACTGGCCTTCCAGATTCACAGTC  
CTTAGTTTTTAAATGAATGTACAGGGAGGTGTATTTCTGGATAAAAAGCAAGATTCCAC  
ACATCTAATGTTATTATTTAAATCCAGGGTAAGTGGACATGTTTTATTCTATGTGGT  
CTGGCTCTGCAAATTAGGAATGGACCTCTCCAAGTCTCTGATGGGCAAAGCGGATCT  
GTTCTGGTAATATACT

>Olf266 DBA/1J

TGTTTGACATCATTGGGGAGGTTACAACCTTACTCACAAAGGGACTAACTTTACAC  
AATGGAATAGATTGAGAAACAGGGTCAATATTCCTGACCTGGCCTTCCAGATTCACAGTC  
CTTAGTTTTTAATGAATGTACAGGGAGGTGTATTTCTGGATAAAAAGCAAGATTCAC  
ACATCTAATGTTATTATTTAAATCCAGGGTAAGTGGACATGTTTTATTCTATGTGGT  
CTGGCTCTGCAAATTAGGAATGGACCTCTCCAAGTCTCTGATGGGCAAAGCGGATCT  
GTTCTGGTAATATACT

>Olf266 DBA/2J

TGTTTGACATCATTGGGGAGGTTACAACCTTACTCACAAAGGGACTAACTTTACAC  
AATGGAATAGATTGAGAAACAGGGTCAATATTCCTGACCTGGCCTTCCAGATTCACAGTC  
CTTAGTTTTTAATGAATGTACAGGGAGGTGTATTTCTGGATAAAAAGCAAGATTCAC  
ACATCTAATGTTATTATTTAAATCCAGGGTAAGTGGACATGTTTTATTCTATGTGGT  
CTGGCTCTGCAAATTAGGAATGGACCTCTCCAAGTCTCTGATGGGCAAAGCGGATCT  
GTTCTGGTAATATACT

>Olf266 FVB/NJ

TGTTTGACATCATTGGGGAGGTTACAACCTTACTCACAAAGGGACTAACTTTACAC  
AATGGAATAGATTGAGAAACAGGGTCAATATTCCTGACCTGGCCTTCCAGATTCACAGTC  
CTTAGTTTTTAATGAATGTACAGGGAGGTGTATTTCTGGATAAAAAGCAAGATTCAC  
ACATCTAATGTTATTATTTAAATCCAGGGTAAGTGGACATGTTTTATTCTATGTGGT  
CTGGCTCTGCAAATTAGGAATGGACCTCTCCAAGTCTCTGATGGGCAAAGCGGATCT  
GTTCTGGTAATATACT

>Olf266 I/LnJ

TGTTTGACATCATTGGGGAGGTTACAACCTTACTCACAAAGGGACTAACTTTACAC  
AATGGAATAGATTGAGAAACAGGGTCAATATTCCTGACCTGGCCTTCCAGATTCACAGTC  
CTTAGTTTTTAATGAATGTACAGGGAGGTGTATTTCTGGATAAAAAGCAAGATTCAC  
ACATCTAATGTTATTATTTAAATCCAGGGTAAGTGGACATGTTTTATTCTATGTGGT  
CTGGCTCTGCAAATTAGGAATGGACCTCTCCAAGTCTCTGATGGGCAAAGCGGATCT  
GTTCTGGTAATATACT

>Olf266 KK/HiJ

TGTTTGACATCATTGGGGAGGTTACAACCTTACTCACAAAGGGACTAACTTTACAC  
AATGGAATAGATTGAGAAACAGGGTCAATATTCCTGACCTGGCCTTCCAGATTCACAGTC  
CTTAGTTTTTAATGAATGTACAGGGAGGTGTATTTCTGGATAAAAAGCAAGATTCAC  
ACATCTAATGTTATTATTTAAATCCAGGGTAAGTGGACATGTTTTATTCTATGTGGT  
CTGGCTCTGCAAATTAGGAATGGACCTCTCCAAGTCTCTGATGGGCAAAGCGGATCT  
GTTCTGGTAATATACT

>Olf266 LEWES/EiJ

TGTTTGACATCATTGGGGAGGTTACAACCTTACTCACAAAGGGACTAACTTTACAC  
AATGGAATAGATTGAGAAACAGGGTCAATATTCCTGACCTGGCCTTCCAGATTCACAGTC  
CTTAGTTTTTAATGAATGTACAGGGAGGTGTATTTCTGGATAAAAAGCAAGATTCAC  
ACATCTAATGTTATTATTTAAATCCAGGGTAAGTGGACATGTTTTATTCTATGTGGC  
CTGGCTCTGCAAAGTAGGAATGGACCTCTCCAAGTCTCTGATGGGCAAAGCGGATCT  
GTTCTGGTAATATACT

>Olf266 LP/J

TGTTTGACATCATTGGGGAGGTTACAACCTTACTCACAAAGGGACTAACTTTACAC  
AATGGAATAGATTGAGAAACAGGGTCAATATTCCTGACCTGGCCTTCCAGATTCACAGTC  
CTTAGTTTTTAATGAATGTACAGGGAGGTGTATTTCTGGATAAAAAGCAAGATTCAC  
ACATCTAATGTTATTATTTAAATCCAGGGTAAGTGGACATGTTTTATTCTATGTGGT  
CTGGCTCTGCAAATTAGGAATGGACCTCTCCAAGTCTCTGATGGGCAAAGCGGATCT  
GTTCTGGTAATATACT

>Olf266 MOLF/EiJ

TGTTTGACATCATTGGGGAGGTTACAACCTTACTCACAAAGGGACTAACTTTACAC

AATGGAATAGATTGAGAAACAGGGTCAATATTCCACTGGCCTTCCAGATTCACAGTC  
CTTAGTTTTTAATGAATGTACAGGGAGGTGTATTTCTGGATAAAAAGCAAGATTCCAC  
ACATCTAATGTTATTATTTGAATCCAGGGTAAGTGGACATGTTTTATTCTATGTGGC  
CTGGCTCTGCAAAGTAGGAATGAACCTCTCCAAGTCTCTGATGGGCAAAGCGGATCT  
GTTCTGGTAATATACT

>Olf266 NOD/ShiLtJ

TGTTTGACATCATTGGGGAGGTTACAACCTTACTCACAAAGGGACTAACTTTACAC  
AATGGAATAGATTGAGAAACAGGGTCAATATTCCACTGGCCTTCCAGATTCACAGTC  
CTTAGTTTTTAATGAATGTACAGGGAGGTGTATTTCTGGATAAAAAGCAAGATTCCAC  
ACATCTAATGTTATTATTTAAATCCAGGGTAAGTGGACATGTTTTATTCTATGTGGT  
CTGGCTCTGCAAATTAGGAATGGACCTCTCCAAGTCTCTGATGGGCAAAGCGGATCT  
GTTCTGGTAATATACT

>Olf266 NZB/B1NJ

TGTTTGACATCATTGGGGAGGTTACAACCTTACTCACAAAGGGACTAACTTTACAC  
AATGGAATAGATTGAGAAACAGGGTCAATATTCCACTGGCCTTCCAGATTCACAGTC  
CTTAGTTTTTAATGAATGTACAGGGAGGTGTATTTCTGGATAAAAAGCAAGATTCCAC  
ACATCTAATGTTATTATTTAAATCCAGGGTAAGTGGACATGTTTTATTCTATGTGGT  
CTGGCTCTGCAAAGTAGGAATGGACCTCTCCAAGTCTCTGATGGGCAAAGCGGATCT  
GTTCTGGTAATATACT

>Olf266 NZO/H1LtJ

TGTTTGACATCATTGGGGAGGTTACAACCTTACTCACAAAGGGACTAACTTTACAC  
AATGGAATAGATTGAGAAACAGGGTCAATATTCCACTGGCCTTCCAGATTCACAGTC  
CTTAGTTTTTAATGAATGTACAGGGAGGTGTATTTCTGGATAAAAAGCAAGATTCCAC  
ACATCTAATGTTATTATTTAAATCCAGGGTAAGTGGACATGTTTTATTCTATGTGGT  
CTGGCTCTGCAAAGTAGGAATGGACCTCTCCAAGTCTCTGATGGGCAAAGCGGATCT  
GTTCTGGTAATATACT

>Olf266 NZW/LacJ

TGTTTGACATCATTGGGGAGGTTACAACCTTACTCACAAAGGGACTAACTTTACAC  
AATGGAATAGATTGAGAAACAGGGTCAATATTCCACTGGCCTTCCAGATTCACAGTC  
CTTAGTTTTTAATGAATGTACAGGGAGGTGTATTTCTGGATAAAAAGCAAGATTCCAC  
ACATCTAATGTTATTATTTAAATCCAGGGTAAGTGGACATGTTTTATTCTATGTGGT  
CTGGCTCTGCAAAGTAGGAATGGACCTCTCCAAGTCTCTGATGGGCAAAGCGGATCT  
GTTCTGGTAATATACT

>Olf266 PWK/PhJ

TGTTTGACATCATTGGGGAGGTTACAACCTTACTCACAAAGGGACTAACTTTACAC  
AATGGAATAGATTGAGAAACAGGGTCAATATTCCACTGGCCTTCCAGATTCACAGTC  
CTTAGTTTTTAATGAATGTACAGGGAGGTGTATTTCTGGATAAAAAGCAAGATTCCAC  
ACATCTAATGTTATTATTTAAATCCAGGGTAAGTGGACATGTTTTATTCTATGTGGT  
CTGGCTCTGCAAAGTAGGAATGGACCTCTCCAAGTCTCTGATGGGCAAAGCGGATCT  
GTTCTGGTAATATACT

>Olf266 RF/J

TGTTTGACATCATTGGGGAGGTTACAACCTTACTCACAAAGGGACTAACTTTACAC  
AATGGAATAGATTGAGAAACAGGGTCAATATTCCACTGGCCTTCCAGATTCACAGTC  
CTTAGTTTTTAATGAATGTACAGGGAGGTGTATTTCTGGATAAAAAGCAAGATTCCAC  
ACATCTAATGTTATTATTTAAATCCAGGGTAAGTGGACATGTTTTATTCTATGTGGT  
CTGGCTCTGCAAATTAGGAATGGACCTCTCCAAGTCTCTGATGGGCAAAGCGGATCT  
GTTCTGGTAATATACT

>Olf266 SEA/GnJ

TGTTTGACATCATTGGGGAGGTTACAACCTTACTCACAAAGGGACTAACTTTACAC  
AATGGAATAGATTGAGAAACAGGGTCAATATTCCACTGGCCTTCCAGATTCACAGTC  
CTTAGTTTTTAATGAATGTACAGGGAGGTGTATTTCTGGATAAAAAGCAAGATTCCAC

ACATCTAATGTTATTATTTAAATCCAGGGTAAGTGGACATGTTTTATTCTATGTGGT  
CTGGCTCTGCAAATTAGGAATGGACCTCTCCAAGTCTCTGATGGGCAAAGCGGATCT  
GTTCTGGTAATATACT

>Olf266 SPRET/EiJ

TGTTTGACATCATTGGGGAGGTTACAACCTTACTCACAAAGGGACTAACTTTACAC  
AATGGAATAGATTGAGAAACAGGGTCAATATCCACTGGCCTTCCAGATTCACAGCC  
CTTAGTTTTTAATGAATGTACAGGGAGGTGTATTTCTGGATAAAAAGCAAGATTCCAC  
ACATTTAATGTCATTATTTAAATCCAGGGTAAGTAGACATGTTTTATTCTATCTGGC  
CTGGCTCTGCAAAGTAGGAATGGACCTCTCCAAGTCTCTGATGGGAAAAGCTGATCT  
GTTCTGGTAATATACT

>Olf266 ST/bJ

TGTTTGACATCATTGGGGAGGTTACAACCTTACTCACAAAGGGACTAACTTTACAC  
AATGGAATAGATTGAGAAACAGGGTCAATATCCACTGGCCTTCCAGATTCACAGTC  
CTTAGTTTTTAATGAATGTACAGGGAGGTGTATTTCTGGATAAAAAGCAAGATTCCAC  
ACATCTAATGTTATTATTTAAATCCAGGGTAAGTGGACATGTTTTATTCTATGTGGT  
CTGGCTCTGCAAATTAGGAATGGACCTCTCCAAGTCTCTGATGGGCAAAGCGGATCT  
GTTCTGGTAATATACT

>Olf266 WSB/EiJ

TGTTTGACATCATTGGGGAGGTTACAACCTTACTCACAAAGGGACTAACTTTACAC  
AATGGAATAGATTGAGAAACAGGGTCAATATCCACTGGCCTTCCAGATTCACAGTC  
CTTAGTTTTTAATGAATGTACAGGGAGGTGTATTTCTGGATAAAAAGCAAGATTCCAC  
ACATCTAATGTTATTATTTAAATCCAGGGTAAGTGGACATGTTTTATTCTATGTGGT  
CTGGCTCTGCAAATTAGGAATGGACCTCTCCAAGTCTCTGATGGGCAAAGCGGATCT  
GTTCTGGTAATATACT

>Olf266 ZALENDE/EiJ

TGTTTGACATCATTGGGGAGGTTACAACCTTACTCACAAAGGGACTAACTTTACAC  
AATGGAATAGATTGAGAAACAGGGTCAATATCCACTGGCCTTCCAGATTCACAGTC  
CTTAGTTTTTAATGAATGTACAGGGAGGTGTATTTCTGGATAAAAAGCAAGATTCCAC  
ACATCTAATGTTATTATTTAAATCCAGGGTAAGTGGACATGTTTTATTCTATGTGGT  
CTGGCTCTGCAAATTAGGAATGGACCTCTCCAAGTCTCTGATGGGCAAAGCGGATCT  
GTTCTGGTAATATACT

>Olf267 C57BL/6J

GGATCTTTGGGGCATTATCCCTGAAGGATGAGAAGTTGCAAACCTCTGTGTAATGCA  
GCTGCTAAACTTTAAATTGTTTCAGGGACAATGAGTATTCCCCCAAAACAAGTGATTT  
AAATGTATATAGTACTGCAGTTTGGGATCCTTTGGTAATTTTGGTTATGTTTGTAAC  
ATCTGGTCATTTTGAAAGAAATGCATTGCATAATTGATTTTTCTATAGCATTTTCAGA  
TTTTAAATGTAGATATATTCATTCTTCTTTACATATAACCAACCATAACTAAGTTGT  
GGAACATATCATAAAA

>Olf267 Wild\_consensus

GGATCTTTGGGGCATTATCCCTGAAGGATGAGAAGTTGCAAACCTCTGTGTAATGCA  
GCTGCTAAACTTTAAATTGTTTCAGGGACAATGAGTATTCCCCCAAAACAAGTGATTT  
AAATGTATATAGTACTGCAGTTTGGGATCCTTTGGTAATTTTGGTTATGTTTGTAAC  
ATCTGGTCATTTTGAAAGAAATGCATTGCATAATTGATTTTTCTATAGCATTTTCAGA  
TTTTAAATGTAGATATATTCATTCTTCTTTACATATAACCAACCATAACTAAGTTGT  
GGAACATATCATAAAA

>Olf267 France

GGATCTTTGGGGCATTATCCCTGAAGGATGAGAAGTTGCAAACCTCTGTGTAATGCA  
GCTGCTAAACTTTAAATTGTTTCAGGGACAATGAGTATTCCCCCAAAACAAGTGATTT  
TAAATGTATATAGTACTGCAGTTTGGGATCCTTTGGTAATTTTGGTTATGTTTGTAAC  
CATCTGGTCATTTTGAAAGAAATGCATTGCATAATTGATTTTTCTATAGCATTTTCAG

ATTTTAAATGTAGATATATTCATTCTTCTTTACATATAACCAACCATAACTTAAGTGTG  
TGGAACATATCATAAAA

>Olf267 Germany

GGATCTTTGGGGCATTATCCCTGAAGGATGAGAAGTTGCAAACCTCTGTGTAATGCA  
GCTGCTAAACTTTAAATTGTTTCAGGGACAATGAGTATTCCCCAAAACAAGTGATTT  
AAATGTATATAGTACTGCAGTTTGGGATCCTTTGGTAATTTTGGTTATGTTTGTAAC  
ATCTGGTCATTTTCAAAGAAATGCATTGCATAATTGATTTTTCTATAGCATTTCAGA  
TTTTAAATGTAGATATATTCATTCTTCTTTACATATAACCAACCATAACTTAAGTGT  
GGAACATATCATAAAA

>Olf267 Iran

GGATCTTTGGGGCATTATCCCTGAAGGATGAGAAGTTGCAAACCTCTGTGTAATGCA  
GCTGCTAAACTTTAAATTGTTTCAGGGACAATGAGTATTCCCCAAAACAAGTGATTT  
AAATGTATATAGTACTGCAGTTTGGGATCCTTTGGTAATTTTGGTTATGTTTGTAAC  
ATCTGGTCATTTTCAAAGAAATGCATTGCATAATTGATTTTTCTATAGCATTTCAGA  
TTTTAAATGTAGATATATTCATTCTTCTTTACATATAACCAACCATAACTTAAGTGT  
GGAACATATCATAAAA

>Olf267 129P2/OlaHsd

GGATCTTTGGGGCATTATCCCTGAAGGATGAGAAGTTGCAAACCTCTGTGTAATGCA  
GCTGCTAAACTTTAAATTGTTTCAGGGACAATGAGTATTCCCCAAAACAAGTGATTT  
AAATGTATATAGTACTGCAGTTTGGGATCCTTTGGTAATTTTGGTTATGTTTGTAAC  
ATCTGGTCATTTTCAAAGAAATGCATTGCATAATTGATTTTTCTATAGCATTTCAGA  
TTTTAAATGTAGATATATTCATTCTTCTTTACATATAACCAACCATAACTTAAGTGT  
GGAACATATCATAAAA

>Olf267 129S1/SvImJ

GGATCTTTGGGGCATTATCCCTGAAGGATGAGAAGTTGCAAACCTCTGTGTAATGCA  
GCTGCTAAACTTTAAATTGTTTCAGGGACAATGAGTATTCCCCAAAACAAGTGATTT  
AAATGTATATAGTACTGCAGTTTGGGATCCTTTGGTAATTTTGGTTATGTTTGTAAC  
ATCTGGTCATTTTCAAAGAAATGCATTGCATAATTGATTTTTCTATAGCATTTCAGA  
TTTTAAATGTAGATATATTCATTCTTCTTTACATATAACCAACCATAACTTAAGTGT  
GGAACATATCATAAAA

>Olf267 129S5SvEvBrd

GGATCTTTGGGGCATTATCCCTGAAGGATGAGAAGTTGCAAACCTCTGTGTAATGCA  
GCTGCTAAACTTTAAATTGTTTCAGGGACAATGAGTATTCCCCAAAACAAGTGATTT  
AAATGTATATAGTACTGCAGTTTGGGATCCTTTGGTAATTTTGGTTATGTTTGTAAC  
ATCTGGTCATTTTCAAAGAAATGCATTGCATAATTGATTTTTCTATAGCATTTCAGA  
TTTTAAATGTAGATATATTCATTCTTCTTTACATATAACCAACCATAACTTAAGTGT  
GGAACATATCATAAAA

>Olf267 A/J

GGATCTTTGGGGCATTATCCCTGAAGGATGAGAAGTTGCAAACCTCTGTGTAATGCA  
GCTGCTAAACTTTAAATTGTTTCAGGGACAATGAGTATTCCCCAAAACAAGTGATTT  
AAATGTATATAGTATTGCAGTTTGGGATCCTTTGGTAATTTTGGTTATGTTTGTAAC  
ATCTGGTCATTTTCAAAGAAATGCATTGCATAATTGATTTTTCTATAGCATTTCAGA  
TTTTAAATGTAGATATATTCATTCTTCTTTACATATAACCAACCATAACTTAAGTGT  
GGAACATATCATAAAA

>Olf267 AKR/J

GGATCTTTGGGGCATTATCCCTGAAGGATGAGAAGTTGCAAACCTCTGTGTAATGCA  
GCTGCTAAACTTTAAATTGTTTCAGGGACAATGAGTATTCCCCAAAACAAGTGATTT  
AAATGTATATAGTATTGCAGTTTGGGATCCTTTGGTAATTTTGGTTATGTTTGTAAC  
ATCTGGTCATTTTCAAAGAAATGCATTGCATAATTGATTTTTCTATAGCATTTCAGA  
TTTTAAATGTAGATATATTCATTCTTCTTTACATATAACCAACCATAACTTAAGTGT  
GGAACATATCATAAAA



>O1fr267 BALB/cJ

GGATCTTTGGGGCATTATCCCTGAAGGATGAGAAGTTGCAAACCTCTGTGTAATGCA  
GCTGCTAAACTTTAAATTGTTTCAGGGACAATGAGTATTCCCCAAAACAAGTGATTT  
AAATGTATATAGTATTGCAGTTTGGGATCCTTTGGTAATTTTGGTTATGTTTGTAAAC  
ATCTGGTCATTTTCAAAGAAATGCATTGCATAATTGATTTTTCTATAGCATTTCAGA  
TTTTAAATGTAGATATATTCATTCTTCTTTACATATAACCAACCATAACTAAGTTGT  
GGAACATATCATAAAA

>O1fr267 BTBR/T\_+\_Itpr3tf/J

GGATCTTTGGGGCATTATCCCTGAAGGATGAGAAGTTGCAAACCTCTGTGTAATGCA  
GCTGCTAAACTTTAAATTGTTTCAGGGACAATGAGTATTCCCCAAAACAAGTGATTT  
AAATGTATATAGTATTGCAGTTTGGGATCCTTTGGTAATTTTGGTTATGTTTGTAAAC  
ATCTGGTCATTTTCAAAGAAATGCATTGCATAATTGATTTTTCTATAGCATTTCAGA  
TTTTAAATGTAGATATATTCATTCTTCTTTACATATAACCAACCATAACTAAGTTGT  
GGAACATATCATAAAA

>O1fr267 BUB/BnJ

GGATCTTTGGGGCATTATCCCTGAAGGATGAGAAGTTGCAAACCTCTGTGTAATGCA  
GCTGCTAAACTTTAAATTGTTTCAGGGACAATGAGTATTCCCCAAAACAAGTGATTT  
AAATGTATATAGTATTGCAGTTTGGGATCCTTTGGTAATTTTGGTTATGTTTGTAAAC  
ATCTGGTCATTTTCAAAGAAATGCATTGCATAATTGATTTTTCTATAGCATTTCAGA  
TTTTAAATGTAGATATATTCATTCTTCTTTACATATAACCAACCATAACTAAGTTGT  
GGAACATATCATAAAA

>O1fr267 C3H/HeH

GGATCTTTGGGGCATTATCCCTGAAGGATGAGAAGTTGCAAACCTCTGTGTAATGCA  
GCTGCTAAACTTTAAATTGTTTCAGGGACAATGAGTATTCCCCAAAACAAGTGATTT  
AAATGTATATAGTATTGCAGTTTGGGATCCTTTGGTAATTTTGGTTATGTTTGTAAAC  
ATCTGGTCATTTTCAAAGAAATGCATTGCATAATTGATTTTTCTATAGCATTTCAGA  
TTTTAAATGTAGATATATTCATTCTTCTTTACATATAACCAACCATAACTAAGTTGT  
GGAACATATCATAAAA

>O1fr267 C3H/HeJ

GGATCTTTGGGGCATTATCCCTGAAGGATGAGAAGTTGCAAACCTCTGTGTAATGCA  
GCTGCTAAACTTTAAATTGTTTCAGGGACAATGAGTATTCCCCAAAACAAGTGATTT  
AAATGTATATAGTATTGCAGTTTGGGATCCTTTGGTAATTTTGGTTATGTTTGTAAAC  
ATCTGGTCATTTTCAAAGAAATGCATTGCATAATTGATTTTTCTATAGCATTTCAGA  
TTTTAAATGTAGATATATTCATTCTTCTTTACATATAACCAACCATAACTAAGTTGT  
GGAACATATCATAAAA

>O1fr267 C57BL/10J

GGATCTTTGGGGCATTATCCCTGAAGGATGAGAAGTTGCAAACCTCTGTGTAATGCA  
GCTGCTAAACTTTAAATTGTTTCAGGGACAATGAGTATTCCCCAAAACAAGTGATTT  
AAATGTATATAGTACTGCAGTTTGGGATCCTTTGGTAATTTTGGTTATGTTTGTAAAC  
ATCTGGTCATTTTCAAAGAAATGCATTGCATAATTGATTTTTCTATAGCATTTCAGA  
TTTTAAATGTAGATATATTCATTCTTCTTTACATATAACCAACCATAACTAAGTTGT  
GGAACATATCATAAAA

>O1fr267 C57BL/6NJ

GGATCTTTGGGGCATTATCCCTGAAGGATGAGAAGTTGCAAACCTCTGTGTAATGCA  
GCTGCTAAACTTTAAATTGTTTCAGGGACAATGAGTATTCCCCAAAACAAGTGATTT  
AAATGTATATAGTACTGCAGTTTGGGATCCTTTGGTAATTTTGGTTATGTTTGTAAAC  
ATCTGGTCATTTTCAAAGAAATGCATTGCATAATTGATTTTTCTATAGCATTTCAGA  
TTTTAAATGTAGATATATTCATTCTTCTTTACATATAACCAACCATAACTAAGTTGT  
GGAACATATCATAAAA

>O1fr267 C57BR/cdJ

GGATCTTTGGGGCATTATCCCTGAAGGATGAGAAGTTGCAAACCTCTGTGTAATGCA

GCTGCTAAACTTTAAATTGTTTCAGGGACAATGAGTATTCCCCAAAACAAGTGATTT  
AAATGTATATAGTATTGCAGTTTGGGATCCTTTGGTAATTTTGGTTATGTTTGTAAAC  
ATCTGGTCATTTTGAAGAAATGCATTGCATAATTGATTTTTCTATAGCATTTTCAGA  
TTTTAAATGTAGATATATTCATTCTTCTTTACATATAACCAACCATAACTAACTTGT  
GGAACATATCATAAAA

>O1fr267 C57L/J

GGATCTTTGGGGCATTATCCCTGAAGGATGAGAAGTTGCAAACCTCTGTGTAATGCA  
GCTGCTAAACTTTAAATTGTTTCAGGGACAATGAGTATTCCCCAAAACAAGTGATTT  
AAATGTATATAGTATTGCAGTTTGGGATCCTTTGGTAATTTTGGTTATGTTTGTAAAC  
ATCTGGTCATTTTGAAGAAATGCATTGCATAATTGATTTTTCTATAGCATTTTCAGA  
TTTTAAATGTAGATATATTCATTCTTCTTTACATATAACCAACCATAACTAACTTGT  
GGAACATATCATAAAA

>O1fr267 C58/J

GGATCTTTGGGGCATTATCCCTGAAGGATGAGAAGTTGCAAACCTCTGTGTAATGCA  
GCTGCTAAACTTTAAATTGTTTCAGGGACAATGAGTATTCCCCAAAACAAGTGATTT  
AAATGTATATAGTACTGCAGTTTGGGATCCTTTGGTAATTTTGGTTATGTTTGTAAAC  
ATCTGGTCATTTTGAAGAAATGCATTGCATAATTGATTTTTCTATAGCATTTTCAGA  
TTTTAAATGTAGATATATTCATTCTTCTTTACATATAACCAACCATAACTAACTTGT  
GGAACATATCATAAAA

>O1fr267 CAST/EiJ

GGATCTTTGGGGCATTATCCCTGAAGGATGAGAAGTTGCAAACCTCTGTATAATACA  
GCTGCTAAACTTTAAATTGTTTCAGGGACAATGAGTATTCCCCAAAACAACAAGTGAT  
TTAAATGTATATAGTACTGCGGTTTGGGATCCTTTGGTAATTTTGGTTATGTTTGTAAAC  
ACATCTGGTCATTTTGAAGAAATGCATTGCATAATTGATTTTTCTATAGCATTTTCAGA  
GATTTTAAATGTAGATATATTCATTCTTCTTTACATATAACCAACCATAACTAACTT  
GTGGAACATATCATAAAA

>O1fr267 CBA/J

GGATCTTTGGGGCATTATCCCTGAAGGATGAGAAGTTGCAAACCTCTGTGTAATGCA  
GCTGCTAAACTTTAAATTGTTTCAGGGACAATGAGTATTCCCCAAAACAAGTGATTT  
AAATGTATATAGTATTGCAGTTTGGGATCCTTTGGTAATTTTGGTTATGTTTGTAAAC  
ATCTGGTCATTTTGAAGAAATGCATTGCATAATTGATTTTTCTATAGCATTTTCAGA  
TTTTAAATGTAGATATATTCATTCTTCTTTACATATAACCAACCATAACTAACTTGT  
GGAACATATCATAAAA

>O1fr267 DBA/1J

GGATCTTTGGGGCATTATCCCTGAAGGATGAGAAGTTGCAAACCTCTGTGTAATGCA  
GCTGCTAAACTTTAAATTGTTTCAGGGACAATGAGTATTCCCCAAAACAAGTGATTT  
AAATGTATATAGTATTGCAGTTTGGGATCCTTTGGTAATTTTGGTTATGTTTGTAAAC  
ATCTGGTCATTTTGAAGAAATGCATTGCATAATTGATTTTTCTATAGCATTTTCAGA  
TTTTAAATGTAGATATATTCATTCTTCTTTACATATAACCAACCATAACTAACTTGT  
GGAACATATCATAAAA

>O1fr267 DBA/2J

GGATCTTTGGGGCATTATCCCTGAAGGATGAGAAGTTGCAAACCTCTGTGTAATGCA  
GCTGCTAAACTTTAAATTGTTTCAGGGACAATGAGTATTCCCCAAAACAAGTGATTT  
AAATGTATATAGTATTGCAGTTTGGGATCCTTTGGTAATTTTGGTTATGTTTGTAAAC  
ATCTGGTCATTTTGAAGAAATGCATTGCATAATTGATTTTTCTATAGCATTTTCAGA  
TTTTAAATGTAGATATATTCATTCTTCTTTACATATAACCAACCATAACTAACTTGT  
GGAACATATCATAAAA

>O1fr267 FVB/NJ

GGATCTTTGGGGCATTATCCCTGAAGGATGAGAAGTTGCAAACCTCTGTGTAATGCA  
GCTGCTAAACTTTAAATTGTTTCAGGGACAATGAGTATTCCCCAAAACAAGTGATTT  
AAATGTATATAGTATTGCAGTTTGGGATCCTTTGGTAATTTTGGTTATGTTTGTAAAC

ATCTGGTCATTTTCAAAGAAATGCATTGCATAATTGATTTTTCTATAGCATTTCAGA  
TTTTAAATGTAGATATATTCATTCTTCTTTACATATAACCAACCATAACTTGT  
GGAACATATCATAAAA

>Olf267 I/LnJ

GGATCTTTGGGGCATTATCCCTGAAGGATGAGAAGTTGCAAACCTCTGTGTAATGCA  
GCTGCTAAACTTTAAATTTGTTTCAGGGACAATGAGTATTCACCAAAACAAGTGATTT  
AAATGTATATAGTATTGCAGTTTGGGATCCTTTGGTAATTTTGGTTATGTTTGTAAAC  
ATCTGGTCATTTTCAAAGAAATGCATTGCATAATTGATTTTTCTATAGCATTTCAGA  
TTTTAAATGTAGATATATTCATTCTTCTTTACATATAACCAACCATAACTTGT  
GGAACATATCATAAAA

>Olf267 KK/HiJ

GGATCTTTGGGGCATTATCCCTGAAGGATGAGAAGTTGCAAACCTCTGTGTAATGCA  
GCTGCTAAACTTTAAATTTGTTTCAGGGACAATGAGTATTCACCAAAACAAGTGATTT  
AAATGTATATAGTACTGCAGTTTGGGATCCTTTGGTAATTTTGGTTATGTTTGTAAAC  
ATCTGGTCATTTTCAAAGAAATGCATTGCATAATTGATTTTTCTATAGCATTTCAGA  
TTTTAAATGTAGATATATTCATTCTTCTTTACATATAACCAACCATAACTTGT  
GGAACATATCATAAAA

>Olf267 LEWES/EiJ

GGATCTTTGGGGCATTATCCCTGAAGGATGAGAAGTTGCAAACCTCTGTGTAATGCA  
GCTGCTAAACTTTAAATTTGTTTCAGGGACAATGAGTATTCACCAAAACAAGTGATTT  
AAATGTATATAGTACTGCAGTTTGGGATCCTTTGGTAATTTTGGTTATGTTTGTAAAC  
ATCTGGTCATTTTCAAAGAAATGCATTGCATAATTGATTTTTCTATAGCATTTCAGA  
TTTTAAATGTAGATATATTCATTCTTCTTTACATATAACCAACCATAACTTGT  
GGAACATATCATAAAA

>Olf267 LP/J

GGATCTTTGGGGCATTATCCCTGAAGGATGAGAAGTTGCAAACCTCTGTGTAATGCA  
GCTGCTAAACTTTAAATTTGTTTCAGGGACAATGAGTATTCACCAAAACAAGTGATTT  
AAATGTATATAGTACTGCAGTTTGGGATCCTTTGGTAATTTTGGTTATGTTTGTAAAC  
ATCTGGTCATTTTCAAAGAAATGCATTGCATAATTGATTTTTCTATAGCATTTCAGA  
TTTTAAATGTAGATATATTCATTCTTCTTTACATATAACCAACCATAACTTGT  
GGAACATATCATAAAA

>Olf267 MOL/HiJ

GGATCTTTGGGGCATTATCCCTGAAGGATGAGAAGTTGCAAACCTCTGTATAATACA  
GCTGCTAAACTTTAAATTTGTTTCAGGGACAATGAGTATTCACCAAAACAAGTGG  
TTTTAAATGTATATAGTACTGCAGTTTGGGATCCTTTGGTAATTTTGGTTATGTTTGT  
AACATCTGGTCATTTTCAAAGAAATGCATTGCATAATTGATTTTTCTATAGCATTTC  
AGATTTTTAAATGTAGATATATTCATTCTTCTTTACATATAACCAACCATAACTTGT  
GTGGAACATATCATAAAA

>Olf267 NOD/ShiLtJ

GGATCTTTGGGGCATTATCCCTGAAGGATGAGAAGTTGCAAACCTCTGTGTAATGCA  
GCTGCTAAACTTTAAATTTGTTTCAGGGACAATGAGTATTCACCAAAACAAGTGATTT  
AAATGTATATAGTATTGCAGTTTGGGATCCTTTGGTAATTTTGGTTATGTTTGTAAAC  
ATCTGGTCATTTTCAAAGAAATGCATTGCATAATTGATTTTTCTATAGCATTTCAGA  
TTTTAAATGTAGATATATTCATTCTTCTTTACATATAACCAACCATAACTTGT  
GGAACATATCATAAAA

>Olf267 NZB/B1NJ

GGATCTTTGGGGCATTATCCCTGAAGGATGAGAAGTTGCAAACCTCTGTGTAATGCA  
GCTGCTAAACTTTAAATTTGTTTCAGGGACAATGAGTATTCACCAAAACAAGTGATTT  
AAATGTATATAGTATTGCAGTTTGGGATCCTTTGGTAATTTTGGTTATGTTTGTAAAC  
ATCTGGTCATTTTCAAAGAAATGCATTGCATAATTGATTTTTCTATAGCATTTCAGA  
TTTTAAATGTAGATATATTCATTCTTCTTTACATATAACCAACCATAACTTGT

GGAACATATCATAAAA

>Olf267 NZO/H1LtJ

GGATCTTTGGGGCATTATCCCTGAAGGATGAGAAGTTGCAAACCTCTGTGTAATGCA  
GCTGCTAAACTTTAAATTGTTTCAGGGACAATGAGTATTCCCCAAAACAAGTGATTT  
AAATGTATATAGTATTGCAGTTTGGGATCCTTTGGTAATTTTGGTTATGTTTGTAAC  
ATCTGGTCATTTTGAAAGAAATGCATTGCATAATTGATTTTTCTATAGCATTTTCAGA  
TTTTAAATGTAGATATATTCATTCTTCTTTACATATAACCAACCATAACTAAGTTGT  
GGAACATATCATAAAA

>Olf267 NZW/LacJ

GGATCTTTGGGGCATTATCCCTGAAGGATGAGAAGTTGCAAACCTCTGTGTAATGCA  
GCTGCTAAACTTTAAATTGTTTCAGGGACAATGAGTATTCCCCAAAACAAGTGATTT  
AAATGTATATAGTATTGCAGTTTGGGATCCTTTGGTAATTTTGGTTATGTTTGTAAC  
ATCTGGTCATTTTGAAAGAAATGCATTGCATAATTGATTTTTCTATAGCATTTTCAGA  
TTTTAAATGTAGATATATTCATTCTTCTTTACATATAACCAACCATAACTAAGTTGT  
GGAACATATCATAAAA

>Olf267 PWK/PhJ

GGATCTTTGGGGCATTATCCCTGAAGGATGAGAAGTTGCAAATCTCTGTATAATACA  
GCTGCTAAACTTTAAATTGTTTCAGGGACAATGAGTATTCCCCAAAACAACAAGTGG  
TTTTAAATGTATATAGTACTGCAGTTTGGGATCCTTTGGTAATTTTGGTTATGTTTGT  
AACATCTGGTCATTTTGAAAGAAATGCATTGCATAATTGATTTTTCTATAGCATTTTC  
AGATTTTTAAATGTAGATATATTCATTCTTCTTTACATATAACCAACCATAACTAAGT  
GTGGAACATATCATAAAA

>Olf267 RF/J

GGATCTTTGGGGCATTATCCCTGAAGGATGAGAAGTTGCAAACCTCTGTGTAATGCA  
GCTGCTAAACTTTAAATTGTTTCAGGGACAATGAGTATTCCCCAAAACAAGTGATTT  
AAATGTATATAGTATTGCAGTTTGGGATCCTTTGGTAATTTTGGTTATGTTTGTAAC  
ATCTGGTCATTTTGAAAGAAATGCATTGCATAATTGATTTTTCTATAGCATTTTCAGA  
TTTTAAATGTAGATATATTCATTCTTCTTTACATATAACCAACCATAACTAAGTTGT  
GGAACATATCATAAAA

>Olf267 SEA/GnJ

GGATCTTTGGGGCATTATCCCTGAAGGATGAGAAGTTGCAAACCTCTGTGTAATGCA  
GCTGCTAAACTTTAAATTGTTTCAGGGACAATGAGTATTCCCCAAAACAAGTGATTT  
AAATGTATATAGTATTGCAGTTTGGGATCCTTTGGTAATTTTGGTTATGTTTGTAAC  
ATCTGGTCATTTTGAAAGAAATGCATTGCATAATTGATTTTTCTATAGCATTTTCAGA  
TTTTAAATGTAGATATATTCATTCTTCTTTACATATAACCAACCATAACTAAGTTGT  
GGAACATATCATAAAA

>Olf267 SPRET/EiJ

GGATCTTTGGGGCATTATCCCTGAAGGATGAGAAGCTGCAAACCTCTGTATAATACA  
GCTGCTAAACTTTAAATTGTTTCAGGGACAATGAGTATTCCCCAAAACAACAAGTGA  
TTTTAAATGTATATAGTACTGCAGTTTGGGATCCTTTGGTAATTTTGGTTATGTTTGT  
AACATTTGGTCATTTTGAAAGAAATGCATTGCATAATTGATTTTTCTATAGCATTTTC  
AGATTTTTAAATGTAGATATATTCATTCTTCTTTACATATAACCAGCCATAACTAAGT  
TGTGGAACATATCATAAAA

>Olf267 ST/bJ

GGATCTTTGGGGCATTATCCCTGAAGGATGAGAAGTTGCAAACCTCTGTGTAATGCA  
GCTGCTAAACTTTAAATTGTTTCAGGGACAATGAGTATTCCCCAAAACAAGTGATTT  
AAATGTATATAGTATTGCAGTTTGGGATCCTTTGGTAATTTTGGTTATGTTTGTAAC  
ATCTGGTCATTTTGAAAGAAATGCATTGCATAATTGATTTTTCTATAGCATTTTCAGA  
TTTTAAATGTAGATATATTCATTCTTCTTTACATATAACCAACCATAACTAAGTTGT  
GGAACATATCATAAAA

>Olf267 WSB/EiJ

GGATCTTTGGGGCATTATCCCTGAAGGATGAGAAGTTGCAAACCTCTGTGTAATGCA  
GCTGCTAAACTTTAAATTGTTTCAGGGACAATGAGTATTCCCCCAAACAAGTGATTT  
AAATGTATATAGTACTGCAGTTTGGGATCCTTTGGTAATTTTGGTTATGTTTGTAAAC  
ATCTGGTCATTTTGAAGAAAATGCATTGCATAATTGATTTTTCTATAGCATTTTCAGA  
TTTTAAATGTAGATATATTCATTCTTCTTTACATATAACCAACCATAACTAACTTGT  
GGAACATATCATAAAA

>Olf267 ZALENDE/EiJ

GGATCTTTGGGGCATTATCCCTGAAGGATGAGAAGTTGCAAACCTCTGTGTAATGCA  
GCTGCTAAACTTTAAATTGTTTCAGGGACAATGAGTATTCCCCCAAACAAGTGATTT  
AAATGTATATAGTATTGCAGTTTGGGATCCTTTGGTAATTTTGGTTATGTTTGTAAAC  
ATCTGGTCATTTTGAAGAAAATGCATTGCATAATTGATTTTTCTATAGCATTTTCAGA  
TTTTAAATGTAGATATATTCATTCTTCTTTACATATAACCAACCATAACTAACTTGT  
GGAACATATCATAAAA

>Olf370 C57BL/6J

GTCTATTTTCTACAACCAACCAAGCTGTTAATTAACCCAGTGCAGCATCTCCATGG  
CAATGCCTTTGGCATCAGGAGACCCACTGAAGACCTTGTACTACCAAAAATGAAGCA  
ACTCCTTTATGGTCACTATTAGCCATGACTGCGGTGCTTGGCTAATTAATATAAAAAG  
GGCACAAAAGGCTGGTTACATTTGTTTCAGTCTGGGTCTCAGACCCAGACTATGA  
TTCCATACCTCCCTGAGTAGACAGCAGCAAACCTTAACTCACCTCGTACTTCCTCTT  
CTTCTAGCAGTCTATG

>Olf370 Wild\_consensus

GTCTATTTTCTACAACCAAGCAAGCTGTTAATTAACCCAGTGCAGCATCTCCATGG  
CAATGCCTTTGGCATCAGGAGACCCACTGAAGACCTTGTACTACCAAAAATGAAGCA  
ACTCCTTTATGGTCACTATTAGCCATGACATCGATGCTTGGCTAATTAATATAAAAAG  
GGCACAAAAGGCTGGTTACATTTGTTTCGGTCTGGGTCTCAGACCCAGACTATG  
ATTCCATACCTCCCTGAGTAGACAGCAGCAAACCTTAACTCACCTCGTACTTCCTCT  
TCTTCTAGCAGTCTATG

>Olf370 France

GTCTATTTTCTACAACCAAGCAAGCTGTTAATTAACCCAGTGCAGCATCTCCATGG  
CAATGCCTTTGGCATCAGGAGACCCACTGAAGACCTTGTACTACCAAAAATGAAGCA  
ACTCCTTTATGGTCACTATTAGCCATGACATCGATGCTTGGCTAATTAATATAAAAAG  
GGCACAAAAGGCTGGTTACATTTGTTTCGGTCTGGGTCTCAGACCCAGACTATG  
ATTCCATACCTCCCTGAGTAGACAGCAGCAAACCTTAACTCACCTCGTACTTCCTCT  
TCTTCTAGCAGTCTATG

>Olf370 Germany

GTCTATTTTCTACAACCAAGCAAGCTGTTAATTAACCCAGTGCAGCATCTCCATGG  
CAATGCCTTTGGCATCAGGAGACCCACTGAAGACCTTGTACTACCAAAAATGAAGCA  
ACTCCTTTATGGTCACTATTAGCCATGACATCGATGCTTGGCTAATTAATATAAAAAG  
GGCACAAAAGGCTGGTTACATTTGTTTCGGTCTGGGTCTCAGACCCAGACTATG  
ATTCCATACCTCCCTGAGTAGACAGCAGCAAACCTTAACTCACCTCGTACTTCCTCT  
TCTTCTAGCAGTCTATG

>Olf370 Iran

GTCTATTTTCTACAACCAAGCAAGCTGTTAATTAACCCAGTGCAGCATCTCCATGG  
CAATGCCTTTGGCATCAGGAGACCCACTGAAGACCTTGTACTACCAAAAATGAAGCA  
ACTCCTTTATGGTCACTATTAGCCATGACATCGATGCTTGGCTAATTAATATAAAAAG  
GGCACAAAAGGCTGGTTACATTTGTTTCGGTCTGGGTCTCAGACCCAGACTATGA  
TTCCATACCTCCCTGAGTAGACAGCAGCAAACCTTAACTCACCTCGTACTTCCTCTT  
CTTCTAGCAGTCTATG

>Olf370 129P2/OlaHsd

GTCTATTTTCTACAACCAAGCAAGCTGTTAATTAACCCAGTGCAGCATCTCCATGG

CAATGCCTTTGGCATCAGGAGACCCACTGAAGACCTTGTACTACCAAAAATGAAGCA  
ACTCCTTTATGGTCACTATTAGCCATGACATCGATGCTTGGCTAATTAATATAAAAAG  
GGCACAAAAAAGGCTGGTTACATTTGTTTTCGGTCTGGGTCTCAGACCCCAGACTATG  
ATTCCATACCTCCCTGAGTAGACAGCAGCAAACCTTAACTCACCTCGTACTTCCTCT  
TCTTCTAGCAGTCTATG

>Olf370 129S1/SvImJ

GTCTATTTTCTACAACCAAGCAAGCTGTTAATTAACCCAGTGCAGCATCTCCATGG  
CAATGCCTTTGGCATCAGGAGACCCACTGAAGACCTTGTACTACCAAAAATGAAGCA  
ACTCCTTTATGGTCACTATTAGCCATGACATCGATGCTTGGCTAATTAATATAAAAAG  
GGCACAAAAAAGGCTGGTTACATTTGTTTTCGGTCTGGGTCTCAGACCCCAGACTATG  
ATTCCATACCTCCCTGAGTAGACAGCAGCAAACCTTAACTCACCTCGTACTTCCTCT  
TCTTCTAGCAGTCTATG

>Olf370 129S5SvEvBrd

GTCTATTTTCTACAACCAAGCAAGCTGTTAATTAACCCAGTGCAGCATCTCCATGG  
CAATGCCTTTGGCATCAGGAGACCCACTGAAGACCTTGTACTACCAAAAATGAAGCA  
ACTCCTTTATGGTCACTATTAGCCATGACATCGATGCTTGGCTAATTAATATAAAAAG  
GGCACAAAAAAGGCTGGTTACATTTGTTTTCGGTCTGGGTCTCAGACCCCAGACTATG  
ATTCCATACCTCCCTGAGTAGACAGCAGCAAACCTTAACTCACCTCGTACTTCCTCT  
TCTTCTAGCAGTCTATG

>Olf370 A/J

GTCTATTTTCTACAACCAAGCAAGCTGTTAATTAACCCAGTGCAGCATCTCCATGG  
CAATGCCTTTGGCATCAGGAGACCCACTGAAGACCTTGTACTACCAAAAATGAAGCA  
ACTCCTTTATGGTCACTATTAGCCATGACATCGATGCTTGGCTAATTAATATAAAAAG  
GGCACAAAAAAGGCTGGTTACATTTGTTTTCGGTCTGGGTCTCAGACCCCAGACTATG  
ATTCCATACCTCCCTGAGTAGACAGCAGCAAACCTTAACTCACCTCGTACTTCCTCT  
TCTTCTAGCAGTCTATG

>Olf370 AKR/J

GTCTATTTTCTACAACCAAGCAAGCTGTTAATTAACCCAGTGCAGCATCTCCATGG  
CAATGCCTTTGGCATCAGGAGACCCACTGAAGACCTTGTACTACCAAAAATGAAGCA  
ACTCCTTTATGGTCACTATTAGCCATGACATCGATGCTTGGCTAATTAATATAAAAAG  
GGCACAAAAAAGGCTGGTTACATTTGTTTTCGGTCTGGGTCTCAGACCCCAGACTATG  
ATTCCATACCTCCCTGAGTAGACAGCAGCAAACCTTAACTCACCTCGTACTTCCTCT  
TCTTCTAGCAGTCTATG

>Olf370 BALB/cJ

GTCTATTTTCTACAACCAAGCAAGCTGTTAATTAACCCAGTGCAGCATCTCCATGG  
CAATGCCTTTGGCATCAGGAGACCCACTGAAGACCTTGTACTACCAAAAATGAAGCA  
ACTCCTTTATGGTCACTATTAGCCATGACATCGATGCTTGGCTAATTAATATAAAAAG  
GGCACAAAAAAGGCTGGTTACATTTGTTTTCGGTCTGGGTCTCAGACCCCAGACTATG  
ATTCCATACCTCCCTGAGTAGACAGCAGCAAACCTTAACTCACCTCGTACTTCCTCT  
TCTTCTAGCAGTCTATG

>Olf370 BTBR/T\_+\_Itpr3tf/J

GTCTATTTTCTACAACCAAGCAAGCTGTTAATTAACCCAGTGCAGCATCTCCATGG  
CAATGCCTTTGGCATCAGGAGACCCACTGAAGACCTTGTACTACCAAAAATGAAGCA  
ACTCCTTTATGGTCACTATTAGCCATGACATCGATGCTTGGCTAATTAATATAAAAAG  
GGCACAAAAAAGGCTGGTTACATTTGTTTTCGGTCTGGGTCTCAGACCCCAGACTATG  
ATTCCATACCTCCCTGAGTAGACAGCAGCAAACCTTAACTCACCTCGTACTTCCTCT  
TCTTCTAGCAGTCTATG

>Olf370 BUB/BnJ

GTCTATTTTCTACAACCAACCAAGCTGTTAATTAACCCAGTGCAGCATCTCCATGG  
CAATGCCTTTGGCATCAGGAGACCCACTGAAGACCTTGTACTACCAAAAATGAAGCA  
ACTCCTTTATGGTCACTATTAGCCATGACTGCGGTGCTTGGCTAATTAATATAAAAAG

GGCACAAAAAGGCTGGTTACATTTGTTTCAGTCTGGGTCTCAGACCCCAGACTATGA  
TTCCATACCTCCCTGAGTAGACAGCAGCAAACCTTTAACTCACCTCGTACTTCCTCTT  
CTTCTAGCAGTCTATG

>Olf370 C3H/HeH

GTCTATTTTCTACAACCAAGCAAGCTGTTAATTAACCCAGTGCAGCATCTCCATGG  
CAATGCCTTTGGCATCAGGAGACCCACTGAAGACCTTGTACTACCAAAAATGAAGCA  
ACTCCTTTATGGTCACTATTAGCCATGACATCGATGCTTGGCTAATTAATATAAAAAG  
GGCACAAAAAGGCTGGTTACATTTGTTTCGGTCTGGGTCTCAGACCCCAGACTATG  
ATTCCATACCTCCCTGAGTAGACAGCAGCAAACCTTTAACTCACCTCGTACTTCCTCT  
TCTTCTAGCAGTCTATG

>Olf370 C3H/HeJ

GTCTATTTTCTACAACCAAGCAAGCTGTTAATTAACCCAGTGCAGCATCTCCATGG  
CAATGCCTTTGGCATCAGGAGACCCACTGAAGACCTTGTACTACCAAAAATGAAGCA  
ACTCCTTTATGGTCACTATTAGCCATGACATCGATGCTTGGCTAATTAATATAAAAAG  
GGCACAAAAAGGCTGGTTACATTTGTTTCGGTCTGGGTCTCAGACCCCAGACTATG  
ATTCCATACCTCCCTGAGTAGACAGCAGCAAACCTTTAACTCACCTCGTACTTCCTCT  
TCTTCTAGCAGTCTATG

>Olf370 C57BL/10J

GTCTATTTTCTACAACCAAGCAAGCTGTTAATTAACCCAGTGCAGCATCTCCATGG  
CAATGCCTTTGGCATCAGGAGACCCACTGAAGACCTTGTACTACCAAAAATGAAGCA  
ACTCCTTTATGGTCACTATTAGCCATGACTGCGGTGCTTGGCTAATTAATATAAAAAG  
GGCACAAAAAGGCTGGTTACATTTGTTTCAGTCTGGGTCTCAGACCCCAGACTATGA  
TTCCATACCTCCCTGAGTAGACAGCAGCAAACCTTTAACTCACCTCGTACTTCCTCTT  
CTTCTAGCAGTCTATG

>Olf370 C57BL/6NJ

GTCTATTTTCTACAACCAAGCAAGCTGTTAATTAACCCAGTGCAGCATCTCCATGG  
CAATGCCTTTGGCATCAGGAGACCCACTGAAGACCTTGTACTACCAAAAATGAAGCA  
ACTCCTTTATGGTCACTATTAGCCATGACTGCGGTGCTTGGCTAATTAATATAAAAAG  
GGCACAAAAAGGCTGGTTACATTTGTTTCAGTCTGGGTCTCAGACCCCAGACTATGA  
TTCCATACCTCCCTGAGTAGACAGCAGCAAACCTTTAACTCACCTCGTACTTCCTCTT  
CTTCTAGCAGTCTATG

>Olf370 C57BR/cdJ

GTCTATTTTCTACAACCAAGCAAGCTGTTAATTAACCCAGTGCAGCATCTCCATGG  
CAATGCCTTTGGCATCAGGAGACCCACTGAAGACCTTGTACTACCAAAAATGAAGCA  
ACTCCTTTATGGTCACTATTAGCCATGACTGCGGTGCTTGGCTAATTAATATAAAAAG  
GGCACAAAAAGGCTGGTTACATTTGTTTCAGTCTGGGTCTCAGACCCCAGACTATGA  
TTCCATACCTCCCTGAGTAGACAGCAGCAAACCTTTAACTCACCTCGTACTTCCTCTT  
CTTCTAGCAGTCTATG

>Olf370 C57L/J

GTCTATTTTCTACAACCAAGCAAGCTGTTAATTAACCCAGTGCAGCATCTCCATGG  
CAATGCCTTTGGCATCAGGAGACCCACTGAAGACCTTGTACTACCAAAAATGAAGCA  
ACTCCTTTATGGTCACTATTAGCCATGACTGCGGTGCTTGGCTAATTAATATAAAAAG  
GGCACAAAAAGGCTGGTTACATTTGTTTCAGTCTGGGTCTCAGACCCCAGACTATGA  
TTCCATACCTCCCTGAGTAGACAGCAGCAAACCTTTAACTCACCTCGTACTTCCTCTT  
CTTCTAGCAGTCTATG

>Olf370 C58/J

GTCTATTTTCTACAACCAAGCAAGCTGTTAATTAACCCAGTGCAGCATCTCCATGG  
CAATGCCTTTGGCATCAGGAGACCCACTGAAGACCTTGTACTACCAAAAATGAAGCA  
ACTCCTTTATGGTCACTATTAGCCATGACATCGATGCTTGGCTAATTAATATAAAAAG  
GGCACAAAAAGGCTGGTTACATTTGTTTCGGTCTGGGTCTCAGACCCCAGACTATG  
ATTCCATACCTCCCTGAGTAGACAGCAGCAAACCTTTAACTCACCTCGTACTTCCTCTT

TCTTCTAGCAGTCTATG

>Olf370 CAST/EiJ

GTCTATTTTCTACAACCAACCAAGCTGTTAATTAACCCAGTGCAGCATCTCCATGG  
CAATGCCTTTGGCATCAGGAGACCCACTGAAGACCTTGTACTACCAAAAATGAAGCA  
ACTCCTTTATGGTCACTATTAGCCATGACTGCGATGCTTGGCTAATTAATATAAAAAG  
GGCACAAAAAGGCTGGTTACATTTGTTTCAGTCTGGGTCTCAGACCCAGACTATGA  
TTCCATACCTCCCTGAGTAGACAGCAGCAAACCTTAACTCACCTCGTACTTCCTCTT  
CTTCTAGCAGTCTATG

>Olf370 CBA/J

GTCTATTTTCTACAACCAAGCAAGCTGTTAATTAACCCAGTGCAGCATCTCCATGG  
CAATGCCTTTGGCATCAGGAGACCCACTGAAGACCTTGTACTACCAAAAATGAAGCA  
ACTCCTTTATGGTCACTATTAGCCATGACATCGATGCTTGGCTAATTAATATAAAAAG  
GGCACAAAAAGGCTGGTTACATTTGTTTCGGTCTGGGTCTCAGACCCAGACTATG  
ATTCCATACCTCCCTGAGTAGACAGCAGCAAACCTTAACTCACCTCGTACTTCCTCT  
TCTTCTAGCAGTCTATG

>Olf370 DBA/1J

GTCTATTTTCTACAACCAAGCAAGCTGTTAATTAACCCAGTGCAGCATCTCCATGG  
CAATGCCTTTGGCATCAGGAGACCCACTGAAGACCTTGTACTACCAAAAATGAAGCA  
ACTCCTTTATGGTCACTATTAGCCATGACATCGATGCTTGGCTAATTAATATAAAAAG  
GGCACAAAAAGGCTGGTTACATTTGTTTCGGTCTGGGTCTCAGACCCAGACTATG  
ATTCCATACCTCCCTGAGTAGACAGCAGCAAACCTTAACTCACCTCGTACTTCCTCT  
TCTTCTAGCAGTCTATG

>Olf370 DBA/2J

GTCTATTTTCTACAACCAAGCAAGCTGTTAATTAACCCAGTGCAGCATCTCCATGG  
CAATGCCTTTGGCATCAGGAGACCCACTGAAGACCTTGTACTACCAAAAATGAAGCA  
ACTCCTTTATGGTCACTATTAGCCATGACATCGATGCTTGGCTAATTAATATAAAAAG  
GGCACAAAAAGGCTGGTTACATTTGTTTCGGTCTGGGTCTCAGACCCAGACTATG  
ATTCCATACCTCCCTGAGTAGACAGCAGCAAACCTTAACTCACCTCGTACTTCCTCT  
TCTTCTAGCAGTCTATG

>Olf370 FVB/NJ

GTCTATTTTCTACAACCAACCAAGCTGTTAATTAACCCAGTGCAGCATCTCCATGG  
CAATGCCTTTGGCATCAGGAGACCCACTGAAGACCTTGTACTACCAAAAATGAAGCA  
ACTCCTTTATGGTCACTATTAGCCATGACTGCGGTGCTTGGCTAATTAATATAAAAAG  
GGCACAAAAAGGCTGGTTACATTTGTTTCAGTCTGGGTCTCAGACCCAGACTATGA  
TTCCATACCTCCCTGAGTAGACAGCAGCAAACCTTAACTCACCTCGTACTTCCTCTT  
CTTCTAGCAGTCTATG

>Olf370 I/LnJ

GTCTATTTTCTACAACCAAGCAAGCTGTTAATTAACCCAGTGCAGCATCTCCATGG  
CAATGCCTTTGGCATCAGGAGACCCACTGAAGACCTTGTACTACCAAAAATGAAGCA  
ACTCCTTTATGGTCACTATTAGCCATGACATCGATGCTTGGCTAATTAATATAAAAAG  
GGCACAAAAAGGCTGGTTACATTTGTTTCAGTCTGGGTCTCAGACCCAGACTATGA  
TTCCATACCTCCCTGAGTAGACAGCAGCAAACCTTAACTCACCTCGTACTTCCTCTT  
CTTCTAGCAGTCTATG

>Olf370 KK/HiJ

GTCTATTTTCTACAACCAAGCAAGCTGTTAATTAACCCAGTGCAGCATCTCCATGG  
CAATGCCTTTGGCATCAGGAGACCCACTGAAGACCTTGTACTACCAAAAATGAAGCA  
ACTCCTTTATGGTCACTATTAGCCATGACATCGATGCTTGGCTAATTAATATAAAAAG  
GGCACAAAAAGGCTGGTTACATTTGTTTCGGTCTGGGTCTCAGACCCAGACTATG  
ATTCCATACCTCCCTGAGTAGACAGCAGCAAACCTTAACTCACCTCGTACTTCCTCT  
TCTTCTAGCAGTCTATG

>Olf370 LEWES/EiJ



GTCTATTTTCTACAACCAAGCAAGCTGTTAATTAACCCAGTGCAGCATCTCCATGG  
CAATGCCTTTGGCATCAGGAGACCCACTGAAGACCTTGTACTACCAAAAATGAAGCA  
ACTCCTTTTATGGTCACTATTAGCCATGACATCGATGCTTGGCTAATTAATATAAAAAG  
GGCACAAAAAAGGCTGGTTACATTTGTTTCGGTCTGGGTCTCAGACCCCAGACTATG  
ATTCCATACCTCCCTGAGTAGACAGCAGCAAACCTTAACTCACCTCGTACTTCCTCT  
TCTTCTAGCAGTCTATG

>Olf370 LP/J

GTCTATTTTCTACAACCAAGCAAGCTGTTAATTAACCCAGTGCAGCATCTCCATGG  
CAATGCCTTTGGCATCAGGAGACCCACTGAAGACCTTGTACTACCAAAAATGAAGCA  
ACTCCTTTTATGGTCACTATTAGCCATGACATCGATGCTTGGCTAATTAATATAAAAAG  
GGCACAAAAAAGGCTGGTTACATTTGTTTCGGTCTGGGTCTCAGACCCCAGACTATG  
ATTCCATACCTCCCTGAGTAGACAGCAGCAAACCTTAACTCACCTCGTACTTCCTCT  
TCTTCTAGCAGTCTATG

>Olf370 MOLF/EiJ

GTCTATTTTCTACAACCAACCAAGCTGTTAATTAACCCAGTGCAGCATCTCCATGG  
CAATGCCTTTGGCATCAGGAGACCCACTGAAGACCTTGTACTACCAAAAATGAAGCA  
ACTCCTTTTATGGTCACTATTAGCCATGACTGCGGTGCTTGGCTAATTAATATAAAAAG  
GGCACAAAAAAGGCTGGTTACATTTGTTTCAGTCTGGGTCTCAGACCCCAGACTATGA  
TTCCATACCTCCCTGAGTAGACAGCAGCAAACCTTAACTCACCTCGTACTTCCTCTT  
CTTCTAGCAGTCTATG

>Olf370 NOD/ShiLtJ

GTCTATTTTCTACAACCAACCAAGCTGTTAATTAACCCAGTGCAGCATCTCCATGG  
CAATGCCTTTGGCATCAGGAGACCCACTGAAGACCTTGTACTACCAAAAATGAAGCA  
ACTCCTTTTATGGTCACTATTAGCCATGACTGCGGTGCTTGGCTAATTAATATAAAAAG  
GGCACAAAAAAGGCTGGTTACATTTGTTTCAGTCTGGGTCTCAGACCCCAGACTATGA  
TTCCATACCTCCCTGAGTAGACAGCAGCAAACCTTAACTCACCTCGTACTTCCTCTT  
CTTCTAGCAGTCTATG

>Olf370 NZB/B1NJ

GTCTATTTTCTACAACCAACCAAGCTGTTAATTAACCCAGTGCAGCATCTCCATGG  
CAATGCCTTTGGCATCAGGAGACCCACTGAAGACCTTGTACTACCAAAAATGAAGCA  
ACTCCTTTTATGGTCACTATTAGCCATGACTGCGGTGCTTGGCTAATTAATATAAAAAG  
GGCACAAAAAAGGCTGGTTACATTTGTTTCAGTCTGGGTCTCAGACCCCAGACTATGA  
TTCCATACCTCCCTGAGTAGACAGCAGCAAACCTTAACTCACCTCGTACTTCCTCTT  
CTTCTAGCAGTCTATG

>Olf370 NZO/H1LtJ

GTCTATTTTCTACAACCAACCAAGCTGTTAATTAACCCAGTGCAGCATCTCCATGG  
CAATGCCTTTGGCATCAGGAGACCCACTGAAGACCTTGTACTACCAAAAATGAAGCA  
ACTCCTTTTATGGTCACTATTAGCCATGACTGCGGTGCTTGGCTAATTAATATAAAAAG  
GGCACAAAAAAGGCTGGTTACATTTGTTTCAGTCTGGGTCTCAGACCCCAGACTATGA  
TTCCATACCTCCCTGAGTAGACAGCAGCAAACCTTAACTCACCTCGTACTTCCTCTT  
CTTCTAGCAGTCTATG

>Olf370 NZW/LacJ

GTCTATTTTCTACAACCAACCAAGCTGTTAATTAACCCAGTGCAGCATCTCCATGG  
CAATGCCTTTGGCATCAGGAGACCCACTGAAGACCTTGTACTACCAAAAATGAAGCA  
ACTCCTTTTATGGTCACTATTAGCCATGACTGCGGTGCTTGGCTAATTAATATAAAAAG  
GGCACAAAAAAGGCTGGTTACATTTGTTTCGGTCTGGGTCTCAGACCCCAGACTATG  
ATTCCATACCTCCCTGAGTAGACAGCAGCAAACCTTAACTCACCTCGTACTTCCTCT  
TCTTCTAGCAGTCTATG

>Olf370 PWK/PhJ

GTCTATTTTCTACAACCAACCAAGCTGTTAATTAACCCAGTGCAGCATCTCCATGG  
CAATGCCTTTGGCATCAGGAGACCCACTGAAGACCTTGTACTACCAAAAATGAAGCA

ACTCCTTTATGGTCACTATTAGCCATGACTGCGATGCTTGGCTAATTAATATAAAAAG  
GGCACAAAAAGGCTGGTTACATTTGTTTCAGTCTGGGTCTCAGACCCCAGACTATGA  
TTCCATACCTCCCTGAGTAGACAGCAGCAAACCTTTAACTCACCTCGTACTTCCTCTT  
CTTCTAGCAGTCTATG

>Olf370 RF/J

GTCTATTTTCTACAACCAAGCAAGCTGTTAATTAACCCAGTGCAGCATCTCCATGG  
CAATGCCTTTGGCATCAGGAGACCCACTGAAGACCTTGTACTACCAAAAATGAAGCA  
ACTCCTTTATGGTCACTATTAGCCATGACATCGATGCTTGGCTAATTAATATAAAAAG  
GGCACAAAAAGGCTGGTTACATTTGTTTCGGTCTGGGTCTCAGACCCCAGACTATG  
ATTCCATACCTCCCTGAGTAGACAGCAGCAAACCTTTAACTCACCTCGTACTTCCTCT  
TCTTCTAGCAGTCTATG

>Olf370 SEA/GnJ

GTCTATTTTCTACAACCAAGCAAGCTGTTAATTAACCCAGTGCAGCATCTCCATGG  
CAATGCCTTTGGCATCAGGAGACCCACTGAAGACCTTGTACTACCAAAAATGAAGCA  
ACTCCTTTATGGTCACTATTAGCCATGACATCGATGCTTGGCTAATTAATATAAAAAG  
GGCACAAAAAGGCTGGTTACATTTGTTTCGGTCTGGGTCTCAGACCCCAGACTATG  
ATTCCATACCTCCCTGAGTAGACAGCAGCAAACCTTTAACTCACCTCGTACTTCCTCT  
TCTTCTAGCAGTCTATG

>Olf370 SPRET/EiJ

GTCTATTTTCTACAACCAAGCAAGCTGTTAATTAACCCAGTGCAGCATCTCCATGG  
CAATGCCTTTGGCATCAGGAGACCCACTGAAGACCTTGTACTACCAAAAATGAAGCA  
ACTCCTTTATGGTCACTATTAGCCATGACAGTGATGCTTGGCTAATTAATATAAAAAG  
GGCACAAAAGGCTGGTTACATTTGTTTCGGTCTGGGTCTCAGACCCCAGACTATGAT  
TGCATACCTCCCTGAGTAGACAGCAGCAAACCTTTAACTCACCTTGTACTTCCTCTTC  
TTCTAGCAGTCTATG

>Olf370 ST/bJ

GTCTATTTTCTACAACCAAGCAAGCTGTTAATTAACCCAGTGCAGCATCTCCATGG  
CAATGCCTTTGGCATCAGGAGACCCACTGAAGACCTTGTACTACCAAAAATGAAGCA  
ACTCCTTTATGGTCACTATTAGCCATGACATCGATGCTTGGCTAATTAATATAAAAAG  
GGCACAAAAAGGCTGGTTACATTTGTTTCGGTCTGGGTCTCAGACCCCAGACTATG  
ATTCCATACCTCCCTGAGTAGACAGCAGCAAACCTTTAACTCACCTCGTACTTCCTCT  
TCTTCTAGCAGTCTATG

>Olf370 WSB/EiJ

GTCTATTTTCTACAACCAAGCAAGCTGTTAATTAACCCAGTGCAGCATCTCCATGG  
CAATGCCTTTGGCATCAGGAGACCCACTGAAGACCTTGTACTACCAAAAATGAAGCA  
ACTCCTTTATGGTCACTATTAGCCATGACATCGATGCTTGGCTAATTAATATAAAAAG  
GGCACAAAAAGGCTGGTTACATTTGTTTCGGTCTGGGTCTCAGACCCCAGACTATG  
ATTCCATACCTCCCTGAGTAGACAGCAGCAAACCTTTAACTCACCTCGTACTTCCTCT  
TCTTCTAGCAGTCTATG

>Olf370 ZALENDE/EiJ

GTCTATTTTCTACAACCAAGCAAGCTGTTAATTAACCCAGTGCAGCATCTCCATGG  
CAATGCCTTTGGCATCAGGAGACCCACTGAAGACCTTGTACTACCAAAAATGAAGCA  
ACTCCTTTATGGTCACTATTAGCCATGACATCGATGCTTGGCTAATTAATATAAAAAG  
GGCACAAAAAGGCTGGTTACATTTGTTTCGGTCTGGGTCTCAGACCCCAGACTATG  
ATTCCATACCTCCCTGAGTAGACAGCAGCAAACCTTTAACTCACCTCGTACTTCCTCT  
TCTTCTAGCAGTCTATG

>Olf371 C57BL/6J

CATTTTACAACATATTTCTCTATTTTCTTTTAAAGTGCTTAGTTTTGTAATGACCCT  
TGGGGGAGGCAGCACAGTTTCTGAACTCAATAACCACAAGGGAACAAAACCTGATTGG  
AACTTTGCCATTAATGTTTTGGTCCCTAGGTTCTAGCAGGTATATTGTCCAGAGAT

TATGAAATTATAAACTTTTATTTAATGAGAGGCTCTGAGAATTGAGTTCATGGAACC  
AAATAAACACACAGCTCCTGACATTGTCATTCACTAACCCAAGCATAACATGAAAAA  
ACAATCCCCCTGCTCC

>Olf371 Wild\_consensus

CATTTTACAACATATTTCTCTATTTTCTTTTAAAGTGCTTAGTTTTGTAATGACCCT  
TGGGGGAGGCAGCACAGTTTCTGAACTCAATAACCACAAGGGAACAAAACCTGATTGG  
AACTTTGCCATTAATGTTTTGGTCCCTAGGTTCCCTAGCAGGTATATTGTCCAGAGAT  
TATGAAATTATAAACTTTTATTTAATGAGAGGCTCTGAGAATTGAGTTCATGGAACC  
AAATAAACACACAGCTCCTGACATTGTCATTCACTAACCCAAGCATAACATGAAAAA  
ACAATCCCCCTGCTCC

>Olf371 France

CATTTTACAACATATTTCTCTATTTTCTTTTAAAGTGCTTAGTTTTGTAATGATCCT  
TGGGGGAGGCAGCACAGTTTCTGAACTCAATAACCACAAGGGAACAAAACCTGATTGG  
AACTTTGCCATTAATGTTTTGGTCCCTAGGTTCCCTAGCAGGTATATTGTCCAGAGAT  
TATGAAATTATAAACTTTTATTTAATGAGAGGCTCTGAGAATTGAGTTCATGGAACC  
AAATAAACACACAGCTCCTGACATTGTCATTCACTAACCCAAGCATAACATGAAAAA  
ACAATCCCCCTGCTCC

>Olf371 Germany

CATTTTACAACATATTTCTCTATTTTCTTTTAAAGTGCTTAGTTTTGTAATGACCCC  
TGGGGGAGGCAGCACAGTTTCTGAACTCAATAACCACAAGGGAACAAAACCTGATTGG  
AACTTTGCCATTAATGTTTTGGTCCCTAGGTTCCCTAGCAGGTATATTGTCCAGAGAT  
TATGAAATTATAAACTTTTATTTAATGAGAGGCTCTGAGAATTGAGTTCATGGAACC  
AAATAAACACACAGCTCCTGACATTGTCATTCACTAACCCAAGCATAACATGAAAAA  
ACAATCCCCCTGCTCC

>Olf371 Iran

CATTTTACAACATATTTCTCTATTTTCTTTTAAAGTGCTTAGTTTTGTAATGACCCT  
TGGGGGAGGCAGCACAGTTTCTGAACTCAATAACCACAAGGGAACAAAACCTGATTGG  
AACTTTGCCATTAATGTTTTGGTCCCTAGGTTCCCTAGCAGGTATATTGTCCAGAGAT  
TATGAAATTATAAACTTTTATTTAATGAGAGGCTCTGAGAATTGAGTTCATGGAACC  
AAATAAACACACAGCTCCTGACATTGTCATTCACTAACCCAAGCATAACATGAAAAA  
ACAATCCCCCTGCTCC

>Olf371 129P2/OlaHsd

CATTTTACAACATATTTCTCTATTTTCTTTTAAAGTGCTTAGTTTTGTAATGATCCT  
TGGGGGAGGCAGCACAGTTTCTGAACTCAATAACCACAAGGGAACAAAACCTGATTGG  
AACTTTGCCATTAATGTTTTGGTCCCTAGGTTCCCTAGCAGGTATATTGTCCAGAGAT  
TATGAAATTATAAACTTTTATTTAATGAGAGGCTCTGAGAATTGAGTTCATGGAACC  
AAATAAACACACAGCTCCTGACATTGTCATTCACTAACCCAAGCATAACATGAAAAA  
ACAATCCCCCTGCTCC

>Olf371 129S1/SvImJ

CATTTTACAACATATTTCTCTATTTTCTTTTAAAGTGCTTAGTTTTGTAATGATCCT  
TGGGGGAGGCAGCACAGTTTCTGAACTCAATAACCACAAGGGAACAAAACCTGATTGG  
AACTTTGCCATTAATGTTTTGGTCCCTAGGTTCCCTAGCAGGTATATTGTCCAGAGAT  
TATGAAATTATAAACTTTTATTTAATGAGAGGCTCTGAGAATTGAGTTCATGGAACC  
AAATAAACACACAGCTCCTGACATTGTCATTCACTAACCCAAGCATAACATGAAAAA  
ACAATCCCCCTGCTCC

>Olf371 129S5SvEvBrd

CATTTTACAACATATTTCTCTATTTTCTTTTAAAGTGCTTAGTTTTGTAATGATCCT  
TGGGGGAGGCAGCACAGTTTCTGAACTCAATAACCACAAGGGAACAAAACCTGATTGG  
AACTTTGCCATTAATGTTTTGGTCCCTAGGTTCCCTAGCAGGTATATTGTCCAGAGAT  
TATGAAATTATAAACTTTTATTTAATGAGAGGCTCTGAGAATTGAGTTCATGGAACC  
AAATAAACACACAGCTCCTGACATTGTCATTCACTAACCCAAGCATAACATGAAAAA

ACAATCCCCCTGCTCC

>Olf371 A/J

CATTTTACAACATATTTCTCTATTTTCCTTTTAAAGTGCTTAGTTTTGTAATGACCCT  
TGGGGGAGGCAGCACAGTTTCTGAACTCAATAACCACAAGGGAACAAAACCTGATTGG  
AACTTTGCCATTAATGTTTTGGTCCCTAGGTTCCCTAGCAGGTATATTGTCCAGAGAT  
TATGAAATTATAAACTTTTATTTAATGAGAGGCTCTGAGAATTGAGTTCATGGAACC  
AAATAACAACACAGCTCCTGACATTGTCATTCACTAACCCAAGCATAACATGAAAAA  
ACAATCCCCCTGCTCC

>Olf371 AKR/J

CATTTTACAACATATTTCTCTATTTTCCTTTTAAAGTGCTTAGTTTTGTAATGATCCT  
TGGGGGAGGCAGCACAGTTTCTGAACTCAATAACCACAAGGGAACAAAACCTGATTGG  
AACTTTGCCATTAATGTTTTGGTCCCTAGGTTCCCTAGCAGGTATATTGTCCAGAGAT  
TATGAAATTATAAACTTTTATTTAATGAGAGGCTCTGAGAATTGAGTTCATGGAACC  
AAATAACAACACAGCTCCTGACATTGTCATTCACTAACCCAAGCATAACATGAAAAA  
ACAATCCCCCTGCTCC

>Olf371 BALB/cJ

CATTTTACAACATATTTCTCTATTTTCCTTTTAAAGTGCTTAGTTTTGTAATGATCCT  
TGGGGGAGGCAGCACAGTTTCTGAACTCAATAACCACAAGGGAACAAAACCTGATTGG  
AACTTTGCCATTAATGTTTTGGTCCCTAGGTTCCCTAGCAGGTATATTGTCCAGAGAT  
TATGAAATTATAAACTTTTATTTAATGAGAGGCTCTGAGAATTGAGTTCATGGAACC  
AAATAACAACACAGCTCCTGACATTGTCATTCACTAACCCAAGCATAACATGAAAAA  
ACAATCCCCCTGCTCC

>Olf371 BTBR/T\_+\_Itpr3tf/J

CATTTTACAACATATTTCTCTATTTTCCTTTTAAAGTGCTTAGTTTTGTAATGATCCT  
TGGGGGAGGCAGCACAGTTTCTGAACTCAATAACCACAAGGGAACAAAACCTGATTGG  
AACTTTGCCATTAATGTTTTGGTCCCTAGGTTCCCTAGCAGGTATATTGTCCAGAGAT  
TATGAAATTATAAACTTTTATTTAATGAGAGGCTCTGAGAATTGAGTTCATGGAACC  
AAATAACAACACAGCTCCTGACATTGTCATTCACTAACCCAAGCATAACATGAAAAA  
ACAATCCCCCTGCTCC

>Olf371 BUB/BnJ

CATTTTACAACATATTTCTCTATTTTCCTTTTAAAGTGCTTAGTTTTGTAATGACCCT  
TGGGGGAGGCAGCACAGTTTCTGAACTCAATAACCACAAGGGAACAAAACCTGATTGG  
AACTTTGCCATTAATGTTTTGGTCCCTAGGTTCCCTAGCAGGTATATTGTCCAGAGAT  
TATGAAATTATAAACTTTTATTTAATGAGAGGCTCTGAGAATTGAGTTCATGGAACC  
AAATAACAACACAGCTCCTGACATTGTCATTCACTAACCCAAGCATAACATGAAAAA  
ACAATCCCCCTGCTCC

>Olf371 C3H/HeH

CATTTTACAACATATTTCTCTATTTTCCTTTTAAAGTGCTTAGTTTTGTAATGACCCT  
TGGGGGAGGCAGCACAGTTTCTGAACTCAATAACCACAAGGGAACAAAACCTGATTGG  
AACTTTGCCATTAATGTTTTGGTCCCTAGGTTCCCTAGCAGGTATATTGTCCAGAGAT  
TATGAAATTATAAACTTTTATTTAATGAGAGGCTCTGAGAATTGAGTTCATGGAACC  
AAATAACAACACAGCTCCTGACATTGTCATTCACTAACCCAAGCATAACATGAAAAA  
ACAATCCCCCTGCTCC

>Olf371 C3H/HeJ

CATTTTACAACATATTTCTCTATTTTCCTTTTAAAGTGCTTAGTTTTGTAATGACCCT  
TGGGGGAGGCAGCACAGTTTCTGAACTCAATAACCACAAGGGAACAAAACCTGATTGG  
AACTTTGCCATTAATGTTTTGGTCCCTAGGTTCCCTAGCAGGTATATTGTCCAGAGAT  
TATGAAATTATAAACTTTTATTTAATGAGAGGCTCTGAGAATTGAGTTCATGGAACC  
AAATAACAACACAGCTCCTGACATTGTCATTCACTAACCCAAGCATAACATGAAAAA  
ACAATCCCCCTGCTCC

>Olf371 C57BL/10J

CATTTTACAACATATTTCTCTATTTTCCTTTTAAAGTGCTTAGTTTTGTAATGACCCT  
TGGGGGAGGCAGCACAGTTTCTGAACTCAATAACCACAAGGGAACAAAACACTGATTGG  
AACTTTGCCATTAATGTTTTGGTCCCTAGGTTCCCTAGCAGGTATATTGTCCAGAGAT  
TATGAAATTATAAACTTTTATTTAATGAGAGGCTCTGAGAATTGAGTTCATGGAACC  
AAATAACAACACAGCTCCTGACATTGTCATTCACTAACCCAAGCATAACATGAAAAA  
ACAATCCCCCTGCTCC

>Olf371 C57BL/6NJ

CATTTTACAACATATTTCTCTATTTTCCTTTTAAAGTGCTTAGTTTTGTAATGACCCT  
TGGGGGAGGCAGCACAGTTTCTGAACTCAATAACCACAAGGGAACAAAACACTGATTGG  
AACTTTGCCATTAATGTTTTGGTCCCTAGGTTCCCTAGCAGGTATATTGTCCAGAGAT  
TATGAAATTATAAACTTTTATTTAATGAGAGGCTCTGAGAATTGAGTTCATGGAACC  
AAATAACAACACAGCTCCTGACATTGTCATTCACTAACCCAAGCATAACATGAAAAA  
ACAATCCCCCTGCTCC

>Olf371 C57BR/cdJ

CATTTTACAACATATTTCTCTATTTTCCTTTTAAAGTGCTTAGTTTTGTAATGACCCT  
TGGGGGAGGCAGCACAGTTTCTGAACTCAATAACCACAAGGGAACAAAACACTGATTGG  
AACTTTGCCATTAATGTTTTGGTCCCTAGGTTCCCTAGCAGGTATATTGTCCAGAGAT  
TATGAAATTATAAACTTTTATTTAATGAGAGGCTCTGAGAATTGAGTTCATGGAACC  
AAATAACAACACAGCTCCTGACATTGTCATTCACTAACCCAAGCATAACATGAAAAA  
ACAATCCCCCTGCTCC

>Olf371 C57L/J

CATTTTACAACATATTTCTCTATTTTCCTTTTAAAGTGCTTAGTTTTGTAATGACCCT  
TGGGGGAGGCAGCACAGTTTCTGAACTCAATAACCACAAGGGAACAAAACACTGATTGG  
AACTTTGCCATTAATGTTTTGGTCCCTAGGTTCCCTAGCAGGTATATTGTCCAGAGAT  
TATGAAATTATAAACTTTTATTTAATGAGAGGCTCTGAGAATTGAGTTCATGGAACC  
AAATAACAACACAGCTCCTGACATTGTCATTCACTAACCCAAGCATAACATGAAAAA  
ACAATCCCCCTGCTCC

>Olf371 C58/J

CATTTTACAACATATTTCTCTATTTTCCTTTTAAAGTGCTTAGTTTTGTAATGACCCT  
TGGGGGAGGCAGCACAGTTTCTGAACTCAATAACCACAAGGGAACAAAACACTGATTGG  
AACTTTGCCATTAATGTTTTGGTCCCTAGGTTCCCTAGCAGGTATATTGTCCAGAGAT  
TATGAAATTATAAACTTTTATTTAATGAGAGGCTCTGAGAATTGAGTTCATGGAACC  
AAATAACAACACAGCTCCTGACATTGTCATTCACTAACCCAAGCATAACATGAAAAA  
ACAATCCCCCTGCTCC

>Olf371 CAST/EiJ

CATTTTACAACATATTTCTCTATTTTCCTTTTAAAGTGCTTAGTTTTGTAATGACCCT  
TGGGGGAGGCAGCACAGTTTCTGAACTCAATAACCACAAGGGAACAAAACACTGATTGG  
AACTTTGCCATTAATGTTTTGGTCCCTAGGTTCCCTAGCAGGTATATTGTCCAGAGAT  
TATGAAATTATAAACTTTTATTTAATGAGAGGCTCTGAGAATTGAGTTCATGGAACC  
AAATAACAACACAGCTCCTGACATTGTCATTCACTAACCCAAGCATAACATGAAAAA  
ACAATCCCCCTGCTCC

>Olf371 CBA/J

CATTTTACAACATATTTCTCTATTTTCCTTTTAAAGTGCTTAGTTTTGTAATGACCCT  
TGGGGGAGGCAGCACAGTTTCTGAACTCAATAACCACAAGGGAACAAAACACTGATTGG  
AACTTTGCCATTAATGTTTTGGTCCCTAGGTTCCCTAGCAGGTATATTGTCCAGAGAT  
TATGAAATTATAAACTTTTATTTAATGAGAGGCTCTGAGAATTGAGTTCATGGAACC  
AAATAACAACACAGCTCCTGACATTGTCATTCACTAACCCAAGCATAACATGAAAAA  
ACAATCCCCCTGCTCC

>Olf371 DBA/1J

CATTTTACAACATATTTCTCTATTTTCCTTTTAAAGTGCTTAGTTTTGTAATGACCCT  
TGGGGGAGGCAGCACAGTTTCTGAACTCAATAACCACAAGGGAACAAAACACTGATTGG

AACTTTGCCATTAATGTTTTGGTCCCTAGGTTCCCTAGCAGGTATATTGTCCAGAGAT  
TATGAAATTATAAACTTTTATTTAATGAGAGGCTCTGAGAATTGAGTTCATGGAACC  
AAATAACAACACAGCTCCTGACATTGTCATTCACTAACCCAAGCATAACATGAAAAA  
ACAATCCCCCTGCTCC

>Olf371 DBA/2J

CATTTTACAACATATTTCTCTATTTCCCTTTTAAAGTGCTTAGTTTTGTAATGACCCT  
TGGGGGAGGCAGCACAGTTTCTGAACTCAATAACCACAAGGGAACAAAACCTGATTGG  
AACTTTGCCATTAATGTTTTGGTCCCTAGGTTCCCTAGCAGGTATATTGTCCAGAGAT  
TATGAAATTATAAACTTTTATTTAATGAGAGGCTCTGAGAATTGAGTTCATGGAACC  
AAATAACAACACAGCTCCTGACATTGTCATTCACTAACCCAAGCATAACATGAAAAA  
ACAATCCCCCTGCTCC

>Olf371 FVB/NJ

CATTTTACAACATATTTCTCTATTTCCCTTTTAAAGTGCTTAGTTTTGTAATGACCCT  
TGGGGGAGGCAGCACAGTTTCTGAACTCAATAACCACAAGGGAACAAAACCTGATTGG  
AACTTTGCCATTAATGTTTTGGTCCCTAGGTTCCCTAGCAGGTATATTGTCCAGAGAT  
TATGAAATTATAAACTTTTATTTAATGAGAGGCTCTGAGAATTGAGTTCATGGAACC  
AAATAACAACACAGCTCCTGACATTGTCATTCACTAACCCAAGCATAACATGAAAAA  
ACAATCCCCCTGCTCC

>Olf371 I/LnJ

CATTTTACAACATATTTCTCTATTTCCCTTTTAAAGTGCTTAGTTTTGTAATGACCCT  
TGGGGGAGGCAGCACAGTTTCTGAACTCAATAACCACAAGGGAACAAAACCTGATTGG  
AACTTTGCCATTAATGTTTTGGTCCCTAGGTTCCCTAGCAGGTATATTGTCCAGAGAT  
TATGAAATTATAAACTTTTATTTAATGAGAGGCTCTGAGAATTGAGTTCATGGAACC  
AAATAACAACACAGCTCCTGACATTGTCATTCACTAACCCAAGCATAACATGAAAAA  
ACAATCCCCCTGCTCC

>Olf371 KK/HiJ

CATTTTACAACATATTTCTCTATTTCCCTTTTAAAGTGCTTAGTTTTGTAATGACCCT  
TGGGGGAGGCAGCACAGTTTCTGAACTCAATAACCACAAGGGAACAAAACCTGATTGG  
AACTTTGCCATTAATGTTTTGGTCCCTAGGTTCCCTAGCAGGTATATTGTCCAGAGAT  
TATGAAATTATAAACTTTTATTTAATGAGAGGCTCTGAGAATTGAGTTCATGGAACC  
AAATAACAACACAGCTCCTGACATTGTCATTCACTAACCCAAGCATAACATGAAAAA  
ACAATCCCCCTGCTCC

>Olf371 LEWES/EiJ

CATTTTACAACATATTTCTCTATTTCCCTTTTAAAGTGCTTAGTTTTGTAATGACCCT  
TGGGGGATGCAGCACAGTTTCTGAACTCAATAACCACAAGGGAACAAAACCTGATTGG  
AACTTTGCCATTAATGTTTTGGTCCCTAGGTTCCCTAGCAGGTATATTGTCCAGAGAT  
TATGAAATTATAAACTTTTATTTAATGAGAGGCTCTGAGAATTGAGTTCATGGAACC  
AAATAACAACACAGCTCCTGACATTGTCATTCACTAACCCAAGCATAACATGAAAAA  
ACAATCCCCCTGCTCC

>Olf371 LP/J

CATTTTACAACATATTTCTCTATTTCCCTTTTAAAGTGCTTAGTTTTGTAATGATCCT  
TGGGGGAGGCAGCACAGTTTCTGAACTCAATAACCACAAGGGAACAAAACCTGATTGG  
AACTTTGCCATTAATGTTTTGGTCCCTAGGTTCCCTAGCAGGTATATTGTCCAGAGAT  
TATGAAATTATAAACTTTTATTTAATGAGAGGCTCTGAGAATTGAGTTCATGGAACC  
AAATAACAACACAGCTCCTGACATTGTCATTCACTAACCCAAGCATAACATGAAAAA  
ACAATCCCCCTGCTCC

>Olf371 MOLF/EiJ

CATTTTACAACATATTTCTCTATTTCCCTTTTAAAGTGTTTAGTTTTGTAATGACCCT  
TGGGGGAGGCAGCACAGTTTCTGAACTCAATAACCACAAGGGAACAAAACCTGATTGG  
AACTTTGCCATTAATGTTTTGGTCCCTAGGTTCCCTAGCAGGTATATTGTCCAGAGAT  
TATGAAATTATAAACTTTTATTTAATGAGAGGCTCTGAGAATTGAGTTCATGGAACC

AAATAACAACACAGCTCCTGACATTGTCATTCACTAACCCAAGCATAACATGAAAAA  
ACAATCCCCCTGCTCC

>Olf371 NOD/ShiLtJ

CATTTTACAACATATTTCTCTATTTCTTTTAAAGTGCTTAGTTTTGTAATGACCCT  
TGGGGGAGGCAGCACAGTTTCTGAACTCAATAACCACAAGGGAACAAAACCTGATTGG  
AACTTTGCCATTAATGTTTTGGTCCCTAGGTTCCCTAGCAGGTATATTGTCCAGAGAT  
TATGAAATTATAAACTTTTATTTAATGAGAGGCTCTGAGAATTGAGTTCATGGAACC  
AAATAACAACACAGCTCCTGACATTGTCATTCACTAACCCAAGCATAACATGAAAAA  
ACAATCCCCCTGCTCC

>Olf371 NZB/B1NJ

CATTTTACAACATATTTCTCTATTTCTTTTAAAGTGCTTAGTTTTGTAATGACCCT  
TGGGGGAGGCAGCACAGTTTCTGAACTCAATAACCACAAGGGAACAAAACCTGATTGG  
AACTTTGCCATTAATGTTTTGGTCCCTAGGTTCCCTAGCAGGTATATTGTCCAGAGAT  
TATGAAATTATAAACTTTTATTTAATGAGAGGCTCTGAGAATTGAGTTCATGGAACC  
AAATAACAACACAGCTCCTGACATTGTCATTCACTAACCCAAGCATAACATGAAAAA  
ACAATCCCCCTGCTCC

>Olf371 NZO/H1LtJ

CATTTTACAACATATTTCTCTATTTCTTTTAAAGTGCTTAGTTTTGTAATGACCCT  
TGGGGGAGGCAGCACAGTTTCTGAACTCAATAACCACAAGGGAACAAAACCTGATTGG  
AACTTTGCCATTAATGTTTTGGTCCCTAGGTTCCCTAGCAGGTATATTGTCCAGAGAT  
TATGAAATTATAAACTTTTATTTAATGAGAGGCTCTGAGAATTGAGTTCATGGAACC  
AAATAACAACACAGCTCCTGACATTGTCATTCACTAACCCAAGCATAACATGAAAAA  
ACAATCCCCCTGCTCC

>Olf371 NZW/LacJ

CATTTTACAACATATTTCTCTATTTCTTTTAAAGTGCTTAGTTTTGTAATGACCCT  
TGGGGGAGGCAGCACAGTTTCTGAACTCAATAACCACAAGGGAACAAAACCTGATTGG  
AACTTTGCCATTAATGTTTTGGTCCCTAGGTTCCCTAGCAGGTATATTGTCCAGAGAT  
TATGAAATTATAAACTTTTATTTAATGAGAGGCTCTGAGAATTGAGTTCATGGAACC  
AAATAACAACACAGCTCCTGACATTGTCATTCACTAACCCAAGCATAACATGAAAAA  
ACAATCCCCCTGCTCC

>Olf371 PWK/PhJ

CATTTTACAACATATTTCTCTATTTCTTTTAAAGTGCTTAGTTTTGTAATGACCCT  
TGGGGGAGGCAGCACAGTTTCTGAACTCAATAACCACAAGGGAACAAAACCTGATTGG  
AACTTTGCCATTAATGTTTTGGTCCCTAGGTTCCCTAGCAGGTATATTGTCCAGAGAT  
TATGAAATTATAAACTTTTATTTAATGAGAGGCTCTGAGAATTGAGTTCATGGAACC  
AAATAACAACACAGCTCCTGACATTGTCATTCACTAACCCAAGCATAACATGAAAAA  
ACAATCCCCCTGCTCC

>Olf371 RF/J

CATTTTACAACATATTTCTCTATTTCTTTTAAAGTGCTTAGTTTTGTAATGATCCT  
TGGGGGAGGCAGCACAGTTTCTGAACTCAATAACCACAAGGGAACAAAACCTGATTGG  
AACTTTGCCATTAATGTTTTGGTCCCTAGGTTCCCTAGCAGGTATATTGTCCAGAGAT  
TATGAAATTATAAACTTTTATTTAATGAGAGGCTCTGAGAATTGAGTTCATGGAACC  
AAATAACAACACAGCTCCTGACATTGTCATTCACTAACCCAAGCATAACATGAAAAA  
ACAATCCCCCTGCTCC

>Olf371 SEA/GnJ

CATTTTACAACATATTTCTCTATTTCTTTTAAAGTGCTTAGTTTTGTAATGATCCT  
TGGGGGAGGCAGCACAGTTTCTGAACTCAATAACCACAAGGGAACAAAACCTGATTGG  
AACTTTGCCATTAATGTTTTGGTCCCTAGGTTCCCTAGCAGGTATATTGTCCAGAGAT  
TATGAAATTATAAACTTTTATTTAATGAGAGGCTCTGAGAATTGAGTTCATGGAACC  
AAATAACAACACAGCTCCTGACATTGTCATTCACTAACCCAAGCATAACATGAAAAA  
ACAATCCCCCTGCTCC

>Olf371 SPRET/EiJ

CATTTTACAACATATTTCTCTATTTTCATTTTAAAGTGCTTATGAATAGTTTTGTAAT  
GACCCTTGGGGGAGGCAGCACAGTTTCTGAACTCAATAACCACAAGAGAACAAAAC  
GATTGGAACCTTGCCATTAATGTTTTGGTCCCTAGGTTCCCTAGCAGGTATATTGTCC  
AGAGATTATGAAATTATAAACTTTTATTTAATGAGAGGCTCTGAGAATTGAGTTCAC  
GGAACCAAATAAACAACACAGCACCTGGCATTGTCATTCACTAACCCAAGCATAACAT  
GAAAAACAATCCCCCTGCTCC

>Olf371 ST/bJ

CATTTTACAACATATTTCTCTATTTTCCTTTTAAAGTGCTTAGTTTTGTAATGACCCT  
TGGGGGAGGCAGCACAGTTTCTGAACTCAATAACCACAAGGGAACAAAACGATTGG  
AACTTTGCCATTAATGTTTTGGTCCCTAGGTTCCCTAGCAGGTATATTGTCCAGAGAT  
TATGAAATTATAAACTTTTATTTAATGAGAGGCTCTGAGAATTGAGTTCATGGAACC  
AAATAAACAACACAGCTCCTGACATTGTCATTCACTAACCCAAGCATAACATGAAAA  
ACAATCCCCCTGCTCC

>Olf371 WSB/EiJ

CATTTTACAACATATTTCTCTATTTTCCTTTTAAAGTGCTTAGTTTTGTAATGATCCT  
TGGGGGAGGCAGCACAGTTTCTGAACTCAATAACCACAAGGGAACAAAACGATTGG  
AACTTTGCCATTAATGTTTTGGTCCCTAGGTTCCCTAGCAGGTATATTGTCCAGAGAT  
TATGAAATTATAAACTTTTATTTAATGAGAGGCTCTGAGAATTGAGTTCATGGAACC  
AAATAAACAACACAGCTCCTGACATTGTCATTCACTAACCCAAGCATAACATGAAAA  
ACAATCCCCCTGCTCC

>Olf371 ZALENDE/EiJ

CATTTTACAACATATTTCTCTATTTTCCTTTTAAAGTGCTTAGTTTTGTAATGATCCT  
TGGGGGAGGCAGCACAGTTTCTGAACTCAATAACCACAAGGGAACAAAACGATTGG  
AACTTTGCCATTAATGTTTTGGTCCCTAGGTTCCCTAGCAGGTATATTGTCCAGAGAT  
TATGAAATTATAAACTTTTATTTAATGAGAGGCTCTGAGAATTGAGTTCATGGAACC  
AAATAAACAACACAGCTCCTGACATTGTCATTCACTAACCCAAGCATAACATGAAAA  
ACAATCCCCCTGCTCC

>Olf466r C57BL/6J

TTCAAATCTTTACTCTAGAACTTCCTTGTGCCACTTTTCCAGTTGCCTGAGCGATCA  
AACTCTTCTTGTTAAAACAGAACCTTAGGGAATAAATCTCTGATGACCAACACCATG  
GGAGCTATATATTCTTTATTCCTATCTCCTGAAAAATTGGGCTGTGGAAATTTTGTG  
TGTGCATAATTTACTGCAGAGTTGAAGAGGAACTCAAGGCTCAGCTAGAAAGGGAAG  
GAAAGATACTACATATCTAGGTGAGGTCTATCTATTTTATAGAAAATATAACGTTTT  
CTCAAAGACACTGTGA

>Olf466r Wild\_consensus

TTCAAATCTTTACTCTAGAACTTCCTTGTGCCACTTTTCCAGTTGCCTGAGCGATCA  
AACTCTTCTTGTTAAAACAGAACCTTAGGGAATAAATCTCTGATGACCAACACCATG  
GGAGCTATATATTCTTTATTCCTATCTCCTGAAAAATTGGGCTGTGGAAATTTTGTG  
TGTGCATAATTTACTGCAGAGTTGAAGAGGAACTCAAGGCTCAGCTAGAAAGGGAAG  
GAAAGATACTACATATCTAGGTGAGGTCTATCTATTTTATAGAAAATATAACGTTTT  
CTCAAAGACACTGTGG

>Olf466r France

TTCAAATCTTTACTCTAGAACTTCCTTGTGCCACTTTTCCAGTTGCCTGAGCGATCA  
AACTCTTCTTGTTAAAACAGAACCTTAGGGAATAAATCTCTGATGACCAACACCATG  
GGAGCTATATATTCTTTATTCCTATCTCCTGAAAAATTGGGCTGTGGAAATTTTGTG  
TGTGCATAATTTACTGCAGAGTTGAAGAGGAACTCAAGGCTCAGCTAGAAAGGGAAG  
GAAAGATACTACATATCTAGGTGAGGTCTATCTATTTTATAGAAAATATAACGTTTT  
CTCAAAGACACTGTGG

>Olf466r Germany



TTCAAATCTTTACTCTAGAACTTCCTTGTGCCACTTTTCCAGTTGCCTGAGCGATCA  
AACTCTTCTTGTTAAAACAGAACCTTAGGGAATAAATCTCTGATGACCAACACCATG  
GGAGCTATATATTCTTTATTCCTATCTCCTGAAAAATTGGGCTGTGGAAATTTTGTG  
TGTGCATAAATTTACTGCAGAGTTGAAGAGGAACTCAAGGCTCAGCTAGAAAGGGAAG  
GAAAGATACTACATATCTAGGTGAGGTCTATCTATTTTATAGAAAATATAACGTTTT  
CTCAAAGACACTGTGG

>Olf466r Iran

TTCAAATCTTTACTCTAGAACTTCCTTGTGCCACTTTTCCAGTTGCCTGAGCGATCA  
AACTCTTCTTGTTAAAACAGAACCTTAGGGAATAAATCTCTGATGACCAACACCATG  
GGAGCTATATATTCTTTATTCCTATCTCCTGAAAAATTGGGCTGTGGAAATTTTGTG  
TGTGCATAAATTTACTGCAGAGTTGAAGAGGAACTCAAGGCTCAGCTAGAAAGGGAAG  
GAAAGATACTACATATCTAGGTGAGGTCTATCTATTTTATAGAAAATATAACGTTTT  
CTCAAAGACACTGTGA

>Olf466r 129P2/OlaHsd

TTCAAATCTTTACTCTAGAACTTCCTTGTGCCACTTTTCCAGTTGCCTGAGCGATCA  
AACTCTTCTTGTTAAAACAGAACCTTAGGGAATAAATCTCTGATGACCAACACCATG  
GGAGCTATATATTCTTTATTCCTATCTCCTGAAAAATTGGGCTGTGGAAATTTTGTG  
TGTGCATAAATTTACTGCAGAGTTGAAGAGGAACTCAAGGCTCAGCTAGAAAGGGAAG  
GAAAGATACTACATATCTAGGTGAGGTCTATTTTATAGAAAATATAACGTTTTCTCA  
AAGACACTGTGG

>Olf466r 129S1/SvImJ

TTCAAATCTTTACTCTAGAACTTCCTTGTGCCACTTTTCCAGTTGCCTGAGCGATCA  
AACTCTTCTTGTTAAAACAGAACCTTAGGGAATAAATCTCTGATGACCAACACCATG  
GGAGCTATATATTCTTTATTCCTATCTCCTGAAAAATTGGGCTGTGGAAATTTTGTG  
TGTGCATAAATTTACTGCAGAGTTGAAGAGGAACTCAAGGCTCAGCTAGAAAGGGAAG  
GAAAGATACTACATATCTAGGTGAGGTCTATTTTATAGAAAATATAACGTTTTCTCA  
AAGACACTGTGG

>Olf466r 129S5SvEvBrd

TTCAAATCTTTACTCTAGAACTTCCTTGTGCCACTTTTCCAGTTGCCTGAGCGATCA  
AACTCTTCTTGTTAAAACAGAACCTTAGGGAATAAATCTCTGATGACCAACACCATG  
GGAGCTATATATTCTTTATTCCTATCTCCTGAAAAATTGGGCTGTGGAAATTTTGTG  
TGTGCATAAATTTACTGCAGAGTTGAAGAGGAACTCAAGGCTCAGCTAGAAAGGGAAG  
GAAAGATACTACATATCTAGGTGAGGTCTATTTTATAGAAAATATAACGTTTTCTCA  
AAGACACTGTGG

>Olf466r A/J

TTCAAATCTTTACTCTAGAACTTCCTTGTGCCACTTTTCCAGTTGCCTGAGCGATCA  
AACTCTTCTTGTTAAAACAGAACCTTAGGGAATAAATCTCTGATGACCAACACCATG  
GGAGCTATATATTCTTTATTCCTATCTCCTGAAAAATTGGGCTGTGGAAATTTTGTG  
TGTGCATAAATTTACTGCAGAGTTGAAGAGGAACTCAAGGCTCAGCTAGAAAGGGAAG  
GAAAGATACTACATATCTAGGTGAGGTCTATTTTATAGAAAATATAACGTTTTCTCA  
AAGACACTGTGG

>Olf466r AKR/J

TTCAAATCTTTACTCTAGAACTTCCTTGTGCCACTTTTCCAGTTGCCTGAGCGATCA  
AACTCTTCTTGTTAAAACAGAACCTTAGGGAATAAATCTCTGATGACCAACACCATG  
GGAGCTATATATTCTTTATTCCTATCTCCTGAAAAATTGGGCTGTGGAAATTTTGTG  
TGTGCATAAATTTACTGCAGAGTTGAAGAGGAACTCAAGGCTCAGCTAGAAAGGGAAG  
GAAAGATACTACATATCTAGGTGAGGTCTATTTTATAGAAAATATAACGTTTTCTCA  
AAGACACTGTGG

>Olf466r BALB/cJ

TTCAAATCTTTACTCTAGAACTTCCTTGTGCCACTTTTCCAGTTGCCTGAGCGATCA  
AACTCTTCTTGTTAAAACAGAACCTTAGGGAATAAATCTCTGATGACCAACACCATG

GGAGCTATATATTCTTTATTCCTATCTCCTGAAAAATTGGGCTGTGGAAATTTTGTG  
TGTGCATAATTTACTGCAGAGTTGAAGAGGAACCTCAAGGCTCAGCTAGAAAGGGAAG  
GAAAGATACTACATATCTAGGTGAGGTCTATTTTATAGAAAATATAACGTTTTCTCA  
AAGACACTGTGG

>Olf466r BTBR/T\_+\_Itpr3tf/J

TTCAAATCTTTACTCTAGAACTTCCTTGTGCCACTTTTCCAGTTGCCTGAGCGATCA  
AACTCTTCTTGTTAAAACAGAACCTTAGGGAATAAATCTCTGATGACCAACACCATG  
GGAGCTATATATTCTTTATTCCTATCTCCTGAAAAATTGGGCTGTGGAAATTTTGTG  
TGTGCATAATTTACTGCAGAGTTGAAGAGGAACCTCAAGGCTCAGCTAGAAAGGGAAG  
GAAAGATACTACATATCTAGGTGAGGTCTATTTTATAGAAAATATAACGTTTTCTCA  
AAGACACTGTGG

>Olf466r BUB/BnJ

TTCAAATCTTTACTCTAGAACTTCCTTGTGCCACTTTTCCAGTTGCCTGAGCGATCA  
AACTCTTCTTGTTAAAACAGAACCTTAGGGAATAAATCTCTGATGACCAACACCATG  
GGAGCTATATATTCTTTATTCCTATCTCCTGAAAAATTGGGCTGTGGAAATTTTGTG  
TGTGCATAATTTACTGCAGAGTTGAAGAGGAACCTCAAGGCTCAGCTAGAAAGGGAAG  
GAAAGATACTACATATCTAGGTGAGGTCTATTTTATAGAAAATATAACGTTTTCTCA  
AAGACACTGTGG

>Olf466r C3H/HeH

TTCAAATCTTTACTCTAGAACTTCCTTGTGCCACTTTTCCAGTTGCCTGAGCGATCA  
AACTCTTCTTGTTAAAACAGAACCTTAGGGAATAAATCTCTGATGACCAACACCATG  
GGAGCTATATATTCTTTATTCCTATCTCCTGAAAAATTGGGCTGTGGAAATTTTGTG  
TGTGCATAATTTACTGCAGAGTTGAAGAGGAACCTCAAGGCTCAGCTAGAAAGGGAAG  
GAAAGATACTACATATCTGGGTGAGGTCTATTTTATAGAAAATATAACGTTTTCTCA  
AAGACACTGTGG

>Olf466r C3H/HeJ

TTCAAATCTTTACTCTAGAACTTCCTTGTGCCACTTTTCCAGTTGCCTGAGCGATCA  
AACTCTTCTTGTTAAAACAGAACCTTAGGGAATAAATCTCTGATGACCAACACCATG  
GGAGCTATATATTCTTTATTCCTATCTCCTGAAAAATTGGGCTGTGGAAATTTTGTG  
TGTGCATAATTTACTGCAGAGTTGAAGAGGAACCTCAAGGCTCAGCTAGAAAGGGAAG  
GAAAGATACTACATATCTGGGTGAGGTCTATTTTATAGAAAATATAACGTTTTCTCA  
AAGACACTGTGG

>Olf466r C57BL/10J

TTCAAATCTTTACTCTAGAACTTCCTTGTGCCACTTTTCCAGTTGCCTGAGCGATCA  
AACTCTTCTTGTTAAAACAGAACCTTAGGGAATAAATCTCTGATGACCAACACCATG  
GGAGCTATATATTCTTTATTCCTATCTCCTGAAAAATTGGGCTGTGGAAATTTTGTG  
TGTGCATAATTTACTGCAGAGTTGAAGAGGAACCTCAAGGCTCAGCTAGAAAGGGAAG  
GAAAGATACTACATATCTAGGTGAGGTCTATCTATTTTATAGAAAATATAACGTTTT  
CTCAAAGACACTGTGA

>Olf466r C57BL/6NJ

TTCAAATCTTTACTCTAGAACTTCCTTGTGCCACTTTTCCAGTTGCCTGAGCGATCA  
AACTCTTCTTGTTAAAACAGAACCTTAGGGAATAAATCTCTGATGACCAACACCATG  
GGAGCTATATATTCTTTATTCCTATCTCCTGAAAAATTGGGCTGTGGAAATTTTGTG  
TGTGCATAATTTACTGCAGAGTTGAAGAGGAACCTCAAGGCTCAGCTAGAAAGGGAAG  
GAAAGATACTACATATCTAGGTGAGGTCTATCTATTTTATAGAAAATATAACGTTTT  
CTCAAAGACACTGTGA

>Olf466r C57BR/cdJ

TTCAAATCTTTACTCTAGAACTTCCTTGTGCCACTTTTCCAGTTGCCTGAGCGATCA  
AACTCTTCTTGTTAAAACAGAACCTTAGGGAATAAATCTCTGATGACCAACACCATG  
GGAGCTATATATTCTTTATTCCTATCTCCTGAAAAATTGGGCTGTGGAAATTTTGTG  
TGTGCATAATTTACTGCAGAGTTGAAGAGGAACCTCAAGGCTCAGCTAGAAAGGGAAG

GAAAGATACTACATATCTAGGTGAGGTCTATCTATTTTATAGAAAATATAACGTTTT  
CTCAAAGACACTGTGA

>Olf466r C57L/J

TTCAAATCTTTACTCTAGAACTTCCTTGTGCCACTTTTCCAGTTGCCTGAGCGATCA  
AACTCTTCTTGTTAAAACAGAACCTTAGGGAATAAATCTCTGATGACCAACACCATG  
GGAGCTATATATTCTTTATTCCTATCTCCTGAAAAATTGGGCTGTGGAAATTTTGTG  
TGTGCATAATTTACTGCAGAGTTGAAGAGGAACTCAAGGCTCAGCTAGAAAGGGAAG  
GAAAGATACTACATATCTAGGTGAGGTCTATCTATTTTATAGAAAATATAACGTTTT  
CTCAAAGACACTGTGA

>Olf466r C58/J

TTCAAATCTTTACTCTAGAACTTCCTTGTGCCACTTTTCCAGTTGCCTGAGCGATCA  
AACTCTTCTTGTTAAAACAGAACCTTAGGGAATAAATCTCTGATGACCAACACCATG  
GGAGCTATATATTCTTTATTCCTATCTCCTGAAAAATTGGGCTGTGGAAATTTTGTG  
TGTGCATAATTTACTGCAGAGTTGAAGAGGAACTCAAGGCTCAGCTAGAAAGGGAAG  
GAAAGATACTACATATCTGGGTGAGGTCTATTTTATAGAAAATATAACGTTTTCTCA  
AAGACACTGTGG

>Olf466r CAST/EiJ

TTCAAATCTTTACTCTAGAACTTCCTTGTGCCACTTTTCCAGTTGCCTGAGCGATCA  
AACTCTTCTTGTTAAAACAGAACCTTAGGGAATAAATCTCTGATGACCAACACCATG  
GGAGCTATATATTCTTTATTCCTATCTCCTGAAAAATTGGGCTGTGGAAATTTTGTG  
TGTGCATAATTTACTGCAGAGTTGAAGAGGAACTCAAGGCTCAGCTAGAAAGGGAAG  
GAAAGATACTACATATCTAGGTGAGGTCTATTTTATAGAAAATATAACGTTTTCTCA  
AAGACACTGTGG

>Olf466r CBA/J

TTCAAATCTTTACTCTAGAACTTCCTTGTGCCACTTTTCCAGTTGCCTGAGCGATCA  
AACTCTTCTTGTTAAAACAGAACCTTAGGGAATAAATCTCTGATGACCAACACCATG  
GGAGCTATATATTCTTTATTCCTATCTCCTGAAAAATTGGGCTGTGGAAATTTTGTG  
TGTGCATAATTTACTGCAGAGTTGAAGAGGAACTCAAGGCTCAGCTAGAAAGGGAAG  
GAAAGATACTACATATCTGGGTGAGGTCTATTTTATAGAAAATATAACGTTTTCTCA  
AAGACACTGTGG

>Olf466r DBA/1J

TTCAAATCTTTACTCTAGAACTTCCTTGTGCCACTTTTCCAGTTGCCTGAGCGATCA  
AACTCTTCTTGTTAAAACAGAACCTTAGGGAATAAATCTCTGATGACCAACACCATG  
GGAGCTATATATTCTTTATTCCTATCTCCTGAAAAATTGGGCTGTGGAAATTTTGTG  
TGTGCATAATTTACTGCAGAGTTGAAGAGGAACTCAAGGCTCAGCTAGAAAGGGAAG  
GAAAGATACTACATATCTAGGTGAGGTCTATTTTATAGAAAATATAACGTTTTCTCA  
AAGACACTGTGG

>Olf466r DBA/2J

TTCAAATCTTTACTCTAGAACTTCCTTGTGCCACTTTTCCAGTTGCCTGAGCGATCA  
AACTCTTCTTGTTAAAACAGAACCTTAGGGAATAAATCTCTGATGACCAACACCATG  
GGAGCTATATATTCTTTATTCCTATCTCCTGAAAAATTGGGCTGTGGAAATTTTGTG  
TGTGCATAATTTACTGCAGAGTTGAAGAGGAACTCAAGGCTCAGCTAGAAAGGGAAG  
GAAAGATACTACATATCTAGGTGAGGTCTATTTTATAGAAAATATAACGTTTTCTCA  
AAGACACTGTGG

>Olf466r FVB/NJ

TTCAAATCTTTACTCTAGAACTTCCTTGTGCCACTTTTCCAGTTGCCTGAGCGATCA  
AACTCTTCTTGTTAAAACAGAACCTTAGGGAATAAATCTCTGATGACCAACACCATG  
GGAGCTATATATTCTTTATTCCTATCTCCTGAAAAATTGGGCTGTGGAAATTTTGTG  
TGTGCATAATTTACTGCAGAGTTGAAGAGGAACTCAAGGCTCAGCTAGAAAGGGAAG  
GAAAGATACTACATATCTAGGTGAGGTCTATTTTATAGAAAATATAACGTTTTCTCA  
AAGACACTGTGG

>Olf466r I/LnJ

TTCAAATCTTTACTCTAGAACTTCCTTGTGCCACTTTTCCAGTTGCCTGAGCGATCA  
AACTCTTCTTGTTAAAACAGAACCTTAGGGAATAAATCTCTGATGACCAACACCATG  
GGAGCTATATATTCTTTATTCCTATCTCCTGAAAAATTGGGCTGTGGAAATTTTGTG  
TGTGCATAATTTACTGCAGAGTTGAAGAGGAACTCAAGGCTCAGCTAGAAAGGGAAG  
GAAAGATACTACATATCTAGGTGAGGTCTATTTTATAGAAAATATAACGTTTTTCTCA  
AAGACACTGTGG

>Olf466r KK/HiJ

TTCAAATCTTTACTCTAGAACTTCCTTGTGCCACTTTTCCAGTTGCCTGAGCGATCA  
AACTCTTCTTGTTAAAACAGAACCTTAGGGAATAAATCTCTGATGACCAACACCATG  
GGAGCTATATATTCTTTATTCCTATCTCCTGAAAAATTGGGCTGTGGAAATTTTGTG  
TGTGCATAATTTACTGCAGAGTTGAAGAGGAACTCAAGGCTCAGCTAGAAAGGGAAG  
GAAAGATACTACATATCTGGGTGAGGTCTATTTTATAGAAAATATAACGTTTTTCTCA  
AAGACACTGTGG

>Olf466r LEWES/EiJ

TTCAAATCTTTACTCTAGAACTTCCTTGTGCCACTTTTCCAGTTGCCTGAGCGATCA  
AACTCTTCTTGTTAAAACAGAACCTTAGGGAATAAATCTCTGATGACCAACACCATG  
GGAGCTATATATTCTTTATTCCTATCTCCTGAAAAATTGGGCTGTGGAAATTTTGTG  
TGTGCATAATTTACTGCAGAGTTGAAGAGGAACTCAAGGCTCAGCTAGAAAGGGAAG  
GAAAGATACTACATATCTAGGTGAGGTCTATTTTATAGAAAATATAACGTTTTTCTCA  
AAGACACTGTGG

>Olf466r LP/J

TTCAAATCTTTACTCTAGAACTTCCTTGTGCCACTTTTCCAGTTGCCTGAGCGATCA  
AACTCTTCTTGTTAAAACAGAACCTTAGGGAATAAATCTCTGATGACCAACACCATG  
GGAGCTATATATTCTTTATTCCTATCTCCTGAAAAATTGGGCTGTGGAAATTTTGTG  
TGTGCATAATTTACTGCAGAGTTGAAGAGGAACTCAAGGCTCAGCTAGAAAGGGAAG  
GAAAGATACTACATATCTAGGTGAGGTCTATTTTATAGAAAATATAACGTTTTTCTCA  
AAGACACTGTGG

>Olf466r MOLF/EiJ

TTCAAATCTTTACTCTAGAACTTCCTTGTGCCACTTTTCCAGTTGCCTGAGCGATCA  
AACTCTTCTTGTTAAAACAGAACCTTAGGGAATAAATCTCTGATGACCAACACCATG  
GAACTATATATTCTTTATTCCTATCTCCTGAAAAATTGGGCTGTGGAAATTTTGTG  
TGTGCATAATTTACTGCAGAGTTGAAGAGGAACTCAAGGCTCAGCTAGAAAGGGAAG  
GAAAGATACTACATATCTAGGTGAGGTCTATTTTACAGAAAATATAATGTTTTTCTCA  
AAGACTCTGTGG

>Olf466r NOD/ShiLtJ

TTCAAATCTTTACTCTAGAACTTCCTTGTGCCACTTTTCCAGTTGCCTGAGCGATCA  
AACTCTTCTTGTTAAAACAGAACCTTAGGGAATAAATCTCTGATGACCAACACCATG  
GGAGCTATATATTCTTTATTCCTATCTCCTGAAAAATTGGGCTGTGGAAATTTTGTG  
TGTGCATAATTTACTGCAGAGTTGAAGAGGAACTCAAGGCTCAGCTAGAAAGGGAAG  
GAAAGATACTACATATCTAGGTGAGGTCTATTTTATAGAAAATATAACGTTTTTCTCA  
AAGACACTGTGG

>Olf466r NZB/B1NJ

TTCAAATCTTTACTCTAGAACTTCCTTGTGCCACTTTTCCAGTTGCCTGAGCGATCA  
AACTCTTCTTGTTAAAACAGAACCTTAGGGAATAAATCTCTGATGACCAACACCATG  
GGAGCTATATATTCTTTATTCCTATCTCCTGAAAAATTGGGCTGTGGAAATTTTGTG  
TGTGCATAATTTACTGCAGAGTTGAAGAGGAACTCAAGGCTCAGCTAGAAAGGGAAG  
GAAAGATACTACATATCTGGGTGAGGTCTATTTTATAGAAAATATAACGTTTTTCTCA  
AAGACACTGTGG

>Olf466r NZO/H1LtJ

TTCAAATCTTTACTCTAGAACTTCCTTGTGCCACTTTTCCAGTTGCCTGAGCGATCA

AACTCTTCTTGTTAAAACAGAACCTTAGGGAATAAATCTCTGATGACCAACACCATG  
GGAGCTATATATTCTTTATTCCTATCTCCTGAAAAATTGGGCTGTGGAAATTTTGTG  
TGTGCATAATTTACTGCAGAGTTGAAGAGGAAGCAAGGCTCAGCTAGAAAGGGAAG  
GAAAGATACTACATATCTGGGTGAGGTCTATTTTATAGAAAATATAACGTTTTCTCA  
AAGACACTGTGG

>Olf466r NZW/LacJ

TTCAAATCTTTACTCTAGAACTTCCTTGTGCCACTTTTCCAGTTGCCTGAGCGATCA  
AACTCTTCTTGTTAAAACAGAACCTTAGGGAATAAATCTCTGATGACCAACACCATG  
GGAGCTATATATTCTTTATTCCTATCTCCTGAAAAATTGGGCTGTGGAAATTTTGTG  
TGTGCATAATTTACTGCAGAGTTGAAGAGGAAGCAAGGCTCAGCTAGAAAGGGAAG  
GAAAGATACTACATATCTAGGTGAGGTCTATTTTATAGAAAATATAACGTTTTCTCA  
AAGACACTGTGG

>Olf466r PWK/PhJ

TTCAAATCTTTACTCTAGAACTTCCTTGTGCCACTTTTCCAGTTGCCTGAGCGATCA  
AACTCTTCTTGTTAAAACAGAACCTTAGGGAATAAATCTCTGATGACCAACACCATG  
GGAGCTATATATTCTTTATTCCTATCTCCTGAAAAATTGGGCTGTGGAAATTTTGTG  
TGTGCATAATTTACTGCAGAGTTGAAGAGGAAGCAAGGCTCAGCTAGAAAGGGAAG  
GAAAGATACTACATATCTAGGTGAGGTCTATTTTATAGAAAATATAACGTTTTCTCA  
AAGACACTGTGG

>Olf466r RF/J

TTCAAATCTTTACTCTAGAACTTCCTTGTGCCACTTTTCCAGTTGCCTGAGCGATCA  
AACTCTTCTTGTTAAAACAGAACCTTAGGGAATAAATCTCTGATGACCAACACCATG  
GGAGCTATATATTCTTTATTCCTATCTCCTGAAAAATTGGGCTGTGGAAATTTTGTG  
TGTGCATAATTTACTGCAGAGTTGAAGAGGAAGCAAGGCTCAGCTAGAAAGGGAAG  
GAAAGATACTACATATCTAGGTGAGGTCTATTTTATAGAAAATATAACGTTTTCTCA  
AAGACACTGTGG

>Olf466r SEA/GnJ

TTCAAATCTTTACTCTAGAACTTCCTTGTGCCACTTTTCCAGTTGCCTGAGCGATCA  
AACTCTTCTTGTTAAAACAGAACCTTAGGGAATAAATCTCTGATGACCAACACCATG  
GGAGCTATATATTCTTTATTCCTATCTCCTGAAAAATTGGGCTGTGGAAATTTTGTG  
TGTGCATAATTTACTGCAGAGTTGAAGAGGAAGCAAGGCTCAGCTAGAAAGGGAAG  
GAAAGATACTACATATCTAGGTGAGGTCTATTTTATAGAAAATATAACGTTTTCTCA  
AAGACACTGTGG

>Olf466r SPRET/EiJ

TTCAAATCTTTACTCTAGAACTTCCTTGTGCCACTTTTCCAGTTGCCTGAGTGATCA  
AACTCTTCTTGTTAAAACAGAACCTTAGGGAATAAATCTCTGATGACCAACACCATG  
GGAAGCTATATATTCTTTATTCCTATCTCCTGAAAAATTGGGCTGTGGAAATTTTGTG  
TGTGCATAATTTACTGCAGAGTTGAAGAGGAAGCAAGGCTCAGCTAGAAAGGGAAG  
GAAAGATACTACATATCTAGGTGAGGTCTATTTTATAGAAAATATAACGTTTTCTCA  
AAGACACTGTGA

>Olf466r ST/bJ

TTCAAATCTTTACTCTAGAACTTCCTTGTGCCACTTTTCCAGTTGCCTGAGCGATCA  
AACTCTTCTTGTTAAAACAGAACCTTAGGGAATAAATCTCTGATGACCAACACCATG  
GGAGCTATATATTCTTTATTCCTATCTCCTGAAAAATTGGGCTGTGGAAATTTTGTG  
TGTGCATAATTTACTGCAGAGTTGAAGAGGAAGCAAGGCTCAGCTAGAAAGGGAAG  
GAAAGATACTACATATCTAGGTGAGGTCTATTTTATAGAAAATATAACGTTTTCTCA  
AAGACACTGTGG

>Olf466r WSB/EiJ

TTCAAATCTTTACTCTAGAACTTCCTTGTGCCACTTTTCCAGTTGCCTGAGCGATCA  
AACTCTTCTTGTTAAAACAGAACCTTAGGGAATAAATCTCTGATGACCAACACCATG  
GGAGCTATATATTCTTTATTCCTATCTCCTGAAAAATTGGGCTGTGGAAATTTTGTG

TGTGCATAATTTACTGCAGAGTTGAAGAGGAACTCAAGGCTCAGCTAGAAAGGGAAG  
GAAAGATACTACATATCTAGGTGAGGTCTATTTTATAGAAAATATAACGTTTTCTCA  
AAGACACTGTGG

>Olf466r ZALENDE/EiJ

TTCAAATCTTTACTCTAGAACTTCCTTGTGCCACTTTTCCAGTTGCCTGAGCGATCA  
AACTCTTCTTGTAAAACAGAACCCTTAGGGAATAAATCTCTGATGACCAACACCATG  
GGAGCTATATATTCTTTATTCCTATCTCCTGAAAAATTGGGCTGTGGAAATTTTGTG  
TGTGCATAATTTACTGCAGAGTTGAAGAGGAACTCAAGGCTCAGCTAGAAAGGGAAG  
GAAAGATACTACATATCTAGGTGAGGTCTATTTTATAGAAAATATAACGTTTTCTCA  
AAGACACTGTGG

>Olf466p C57BL/6J

TGGTTCAGTGCTTTTGTAGTTTCACTGTGTCTCTCTTTTGTCTGTTTCAATGAC  
TTGTCCATTAATGAGTGAGGTGCTGAAGTATCCCACTATTATTGTGTGAGGTTTAGT  
GTGTGCTTTTTTAGCTTTAGTGACATTTCTTTTAAAAATGTAGGTGTCTTGCATTT  
GGGGCATAGATGTTTCAAGATTGAGACTTACTCTTGGTGGATCTTTCCTTTGATGAAT  
ATATGAAGTGTCTTTCGCCATCTCGTTTGATAAGTTTTGGTTGAAAGTCTATTTTAT  
TGAATATTAGAATGGC

>Olf466p Wild\_consensus

TGGTTCAGTGCTTTTGTAGTTTCACTGTGTCTCTCTTTTGTCTGTTTCAATGAC  
TTGTCCATTAATGAGTGAGGTGCGGAAGTATCCCACTATTATTGTGTGAGGTTTAGT  
GTGTGCTTTTTTAGCTTTAGTGACATTTCTTTTAAAAATGTAGGTGTCTTGCATTT  
GGGGCATAGATGTTTCAAGATTGAGACTTACTCTTGGTGGATCTTTCCTTTGATGAAT  
ATATGAAGTGTCTTTCGCCATCTCGTTTGATMAGTTTTGGTTGAAAGTCTATTTTAT  
TGAATATTAGAATGGC

>Olf466p France

TGGTTCAGTGCTTTTGTAGTTTCACTGTGTCTCTCTTTTGTCTGTTTCAATGAC  
TTGTCCATTAATGAGTGAGGTGCGGAAGTATCCCACTATTATTGTGTGAGGTTTAGT  
GTGTGCTTTTTTAGCTTTAGTGACATTTCTTTTAAAAATGTAGGTGTCTTGCATTT  
GGGGCATAGATGTTTCAAGATTGAGACTTACTCTTGGTGGATCTTTCCTTTGATGAAT  
ATATGAAGTGTCTTTCGCCATCTCGTTTGATAAGTTTTGGTTGAAAGTCTATTTTAT  
TGAATATTAGAATGGC

>Olf466p Germany

TGGTTCAGTGCTTTTGTAGTTTCACTGTGTCTCTCTTTTGTCTGTTTCAATGAC  
TTGTCCATTAATGAGTGAGGTGCGGAAGTATCCCACTATTATTGTGTGAGGTTTAGT  
GTGTGCTTTTTTAGCTTTAGTGACATTTCTTTTAAAAATGTAGGTGTCTTGCATTT  
GGGGCATAGATGTTTCAAGATTGAGACTTACTCTTGGTGGATCTTTCCTTTGATGAAT  
ATATGAAGTGTCTTTCGCCATCTCGTTTGATCAGTTTTGGTTGAAAGTCTATTTTAT  
TGAATATTAGAATGGC

>Olf466p Iran

TGGTTCAGTGCTTTTGTAGTTTCACTGTGTCTCTCTTTTGTCTGTTTCAATGAC  
TTGTCCATTAATGAGTGAGGTGCGGAAGTATCCCACTATTATTGTGTGAGGTTTAGT  
GTGTGCTTTTTTAGCTTTAGTGACATTTCTTTTAAAAATGTAGGTGTCTTGCATTT  
GGGGCATAGATGTTTCAAGATTGAGACTTACTCTTGGTGGATCTTTCCTTTGATGAAT  
ATATGAAGTGTCTTTCGCCATCTCGTTTGATAAGTTTTGGTTGAAAGTCTATTTTAT  
TGAATATTAGAATGGC

>Olf466p 129P2/OlaHsd

TGGTTCAGTGCTTTTGTAGTTTCACTGTGTCTCTCTTTTGTCTGTTTCAATGAC  
TTGTCCATTAATGAGTGAGGTGCGGAAGTATCCCACTATTATTGTGTGAGGTTTAGT  
GTGTGCTTTTTTAGCTTTAGTGACATTTCTTTTAAAAATGTAGGTGTCTTGCATTT  
GGGGCATAGATGTTTCAAGATTGAGACTTACTCTTGGTGGATCTTTCCTTTGATGAAT

ATATGAAGTGTCTTCGCCATCTCGTTTGATCAGTTTTGGTTGAAAGTCTATTTTAT  
TGAATATTAGAATGGC

>Olf466p 129S1/SvImJ

TGGTTCAGTGCTTTTGTAGTTTCACTGTGTCTCTCTTTTGTCTGTTTCAATGAC  
TTGTCCATTAATGAGTGAGGTGCGGAAGTATCCCCTATTATTGTGTGAGGTTTAGT  
GTGTGCTTTTTTAGCTTTAGTGACATTTCTTTTAAAAATGTAGGTGTCTTGCATTT  
GGGGCATAGATGTTTCAAGATTGAGACTTACTCTTGGTGGATCTTTCCTTTGATGAAT  
ATATGAAGTGTCTTCGCCATCTCGTTTGATCAGTTTTGGTTGAAAGTCTATTTTAT  
TGAATATTAGAATGGC

>Olf466p 129S5SvEvBrd

TGGTTCAGTGCTTTTGTAGTTTCACTGTGTCTCTCTTTTGTCTGTTTCAATGAC  
TTGTCCATTAATGAGTGAGGTGCGGAAGTATCCCCTATTATTGTGTGAGGTTTAGT  
GTGTGCTTTTTTAGCTTTAGTGACATTTCTTTTAAAAATGTAGGTGTCTTGCATTT  
GGGGCATAGATGTTTCAAGATTGAGACTTACTCTTGGTGGATCTTTCCTTTGATGAAT  
ATATGAAGTGTCTTCGCCATCTCGTTTGATCAGTTTTGGTTGAAAGTCTATTTTAT  
TGAATATTAGAATGGC

>Olf466p A/J

TGGTTCAGTGCTTTTGTAGTTTCACTGTGTCTCTCTTTTGTCTGTTTCAATGAC  
TTGTCCATTAATGAGTGAGGTGCGGAAGTATCCCCTATTATTGTGTGAGGTTTAGT  
GTGTGCTTTTTTAGCTTTAGTGACATTTCTTTTAAAAATGTAGGTGTCTTGCATTT  
GGGGCATAGATGTTTCAAGATTGAGACTTACTCTTGGTGGATCTTTCCTTTGATGAAT  
ATATGAAGTGTCTTCGCCATCTCGTTTGATCAGTTTTGGTTGAAAGTCTATTTTAT  
TGAATATTAGAATGGC

>Olf466p AKR/J

TGGTTCAGTGCTTTTGTAGTTTCACTGTGTCTCTCTTTTGTCTGTTTCAATGAC  
TTGTCCATTAATGAGTGAGGTGCGGAAGTATCCCCTATTATTGTGTGAGGTTTAGT  
GTGTGCTTTTTTAGCTTTAGTGACATTTCTTTTAAAAATGTAGGTGTCTTGCATTT  
GGGGCATAGATGTTTCAAGATTGAGACTTACTCTTGGTGGATCTTTCCTTTGATGAAT  
ATATGAAGTGTCTTCGCCATCTCGTTTGATCAGTTTTGGTTGAAAGTCTATTTTAT  
TGAATATTAGAATGGC

>Olf466p BALB/cJ

TGGTTCAGTGCTTTTGTAGTTTCACTGTGTCTCTCTTTTGTCTGTTTCAATGAC  
TTGTCCATTAATGAGTGAGGTGCGGAAGTATCCCCTATTATTGTGTGAGGTTTAGT  
GTGTGCTTTTTTAGCTTTAGTGACATTTCTTTTAAAAATGTAGGTGTCTTGCATTT  
GGGGCATAGATGTTTCAAGATTGAGACTTACTCTTGGTGGATCTTTCCTTTGATGAAT  
ATATGAAGTGTCTTCGCCATCTCGTTTGATCAGTTTTGGTTGAAAGTCTATTTTAT  
TGAATATTAGAATGGC

>Olf466p BTBR/T\_+\_Itpr3tf/J

TGGTTCAGTGCTTTTGTAGTTTCACTGTGTCTCTCTTTTGTCTGTTTCAATGAC  
TTGTCCATTAATGAGTGAGGTGCGGAAGTATCCCCTATTATTGTGTGAGGTTTAGT  
GTGTGCTTTTTTAGCTTTAGTGACATTTCTTTTAAAAATGTAGGTGTCTTGCATTT  
GGGGCATAGATGTTTCAAGATTGAGACTTACTCTTGGTGGATCTTTCCTTTGATGAAT  
ATATGAAGTGTCTTCGCCATCTCGTTTGATCAGTTTTGGTTGAAAGTCTATTTTAT  
TGAATATTAGAATGGC

>Olf466p BUB/BnJ

TGGTTCAGTGCTTTTGTAGTTTCACTGTGTCTCTCTTTTGTCTGTTTCAATGAC  
TTGTCCATTAATGAGTGAGGTGCGGAAGTATCCCCTATTATTGTGTGAGGTTTAGT  
GTGTGCTTTTTTAGCTTTAGTGACATTTCTTTTAAAAATGTAGGTGTCTTGCATTT  
GGGGCATAGATGTTTCAAGATTGAGACTTACTCTTGGTGGATCTTTCCTTTGATGAAT  
ATATGAAGTGTCTTCGCCATCTCGTTTGATCAGTTTTGGTTGAAAGTCTATTTTAT  
TGAATATTAGAATGGC

>O1fr466p C3H/HeH

TGGTTCAGTGCTTTTGTAGTTTCACTGTGTCTCTCTTTTGTCTGTTTCAATGAC  
TTGTCCATTAATGAGTGAGGTGCGGAAGTATCCCACACTATTATTGTGTGAGGTTT  
GTGTGCTTTTTTAGCTTTAGTGACATTTCTTTTAAAAATGTAGGTGTCTTGCATTT  
GGGGCATAGATGTTTCAGAATTGAGACTTACTCTTGGTGGATCTTTCCTTTGATGAAT  
ATATGAAGTGTCTTCGCCATCTCGTTTGATCAGTTTTGGTTGAAAGTCTATTTTAT  
TGAATATTAGAATGGC

>O1fr466p C3H/HeJ

TGGTTCAGTGCTTTTGTAGTTTCACTGTGTCTCTCTTTTGTCTGTTTCAATGAC  
TTGTCCATTAATGAGTGAGGTGCGGAAGTATCCCACACTATTATTGTGTGAGGTTT  
GTGTGCTTTTTTAGCTTTAGTGACATTTCTTTTAAAAATGTAGGTGTCTTGCATTT  
GGGGCATAGATGTTTCAGAATTGAGACTTACTCTTGGTGGATCTTTCCTTTGATGAAT  
ATATGAAGTGTCTTCGCCATCTCGTTTGATCAGTTTTGGTTGAAAGTCTATTTTAT  
TGAATATTAGAATGGC

>O1fr466p C57BL/10J

TGGTTCAGTGCTTTTGTAGTTTCACTGTGTCTCTCTTTTGTCTGTTTCAATGAC  
TTGTCCATTAATGAGTGAGGTGCTGAAGTATCCCACACTATTATTGTGTGAGGTTT  
GTGTGCTTTTTTAGCTTTAGTGACATTTCTTTTAAAAATGTAGGTGTCTTGCATTT  
GGGGCATAGATGTTTCAGAATTGAGACTTACTCTTGGTGGATCTTTCCTTTGATGAAT  
ATATGAAGTGTCTTCGCCATCTCGTTTGATAAGTTTTGGTTGAAAGTCTATTTTAT  
TGAATATTAGAATGGC

>O1fr466p C57BL/6NJ

TGGTTCAGTGCTTTTGTAGTTTCACTGTGTCTCTCTTTTGTCTGTTTCAATGAC  
TTGTCCATTAATGAGTGAGGTGCTGAAGTATCCCACACTATTATTGTGTGAGGTTT  
GTGTGCTTTTTTAGCTTTAGTGACATTTCTTTTAAAAATGTAGGTGTCTTGCATTT  
GGGGCATAGATGTTTCAGAATTGAGACTTACTCTTGGTGGATCTTTCCTTTGATGAAT  
ATATGAAGTGTCTTCGCCATCTCGTTTGATAAGTTTTGGTTGAAAGTCTATTTTAT  
TGAATATTAGAATGGC

>O1fr466p C57BR/cdJ

TGGTTCAGTGCTTTTGTAGTTTCACTGTGTCTCTCTTTTGTCTGTTTCAATGAC  
TTGTCCATTAATGAGTGAGGTGCTGAAGTATCCCACACTATTATTGTGTGAGGTTT  
GTGTGCTTTTTTAGCTTTAGTGACATTTCTTTTAAAAATGTAGGTGTCTTGCATTT  
GGGGCATAGATGTTTCAGAATTGAGACTTACTCTTGGTGGATCTTTCCTTTGATGAAT  
ATATGAAGTGTCTTCGCCATCTCGTTTGATAAGTTTTGGTTGAAAGTCTATTTTAT  
TGAATATTAGAATGGC

>O1fr466p C57L/J

TGGTTCAGTGCTTTTGTAGTTTCACTGTGTCTCTCTTTTGTCTGTTTCAATGAC  
TTGTCCATTAATGAGTGAGGTGCTGAAGTATCCCACACTATTATTGTGTGAGGTTT  
GTGTGCTTTTTTAGCTTTAGTGACATTTCTTTTAAAAATGTAGGTGTCTTGCATTT  
GGGGCATAGATGTTTCAGAATTGAGACTTACTCTTGGTGGATCTTTCCTTTGATGAAT  
ATATGAAGTGTCTTCGCCATCTCGTTTGATAAGTTTTGGTTGAAAGTCTATTTTAT  
TGAATATTAGAATGGC

>O1fr466p C58/J

TGGTTCAGTGCTTTTGTAGTTTCACTGTGTCTCTCTTTTGTCTGTTTCAATGAC  
TTGTCCATTAATGAGTGAGGTGCGGAAGTATCCCACACTATTATTGTGTGAGGTTT  
GTGTGCTTTTTTAGCTTTAGTGACATTTCTTTTAAAAATGTAGGTGTCTTGCATTT  
GGGGCATAGATGTTTCAGAATTGAGACTTACTCTTGGTGGATCTTTCCTTTGATGAAT  
ATATGAAGTGTCTTCGCCATCTCGTTTGATCAGTTTTGGTTGAAAGTCTATTTTAT  
TGAATATTAGAATGGC

>O1fr466p CAST/EiJ

TGGTTCAGTGCTTTTGTAGTTTCACTGTGTCTCTCTTTTGTCTGTTTCAATGAC



TTGTCCATTAATGAGTGAGGTGCGGAAGTATCCCACACTATTATTGTGTGAGGTTTAGT  
GTGTGCTTTTTTAGCTTTAGTGACATTTCTTTTAAAAATGTAGGTATCCTTGCATTT  
GGGGCATAGATGTTT CAGAATTGAGACTTACTCTTGGTGGATCTTTCCTTTGATGAAT  
ATATGAAGTGTCTTTCGCCATCTCGTTTGATCAGTTTTGGTTGAAAGTCTATTTTAT  
TGAATATTAGAATGGC

>Olf466p CBA/J

TGGTTCAGTGCTTTTTGTTAGTTTCACTGTGTCTCTCTTTTTGTTTCTGTTTCAATGAC  
TTGTCCATTAATGAGTGAGGTGCGGAAGTATCCCACACTATTATTGTGTGAGGTTTAGT  
GTGTGCTTTTTTAGCTTTAGTGACATTTCTTTTAAAAATGTAGGTGTCTTGCATTT  
GGGGCATAGATGTTT CAGAATTGAGACTTACTCTTGGTGGATCTTTCCTTTGATGAAT  
ATATGAAGTGTCTTTCGCCATCTCGTTTGATCAGTTTTGGTTGAAAGTCTATTTTAT  
TGAATATTAGAATGGC

>Olf466p DBA/1J

TGGTTCAGTGCTTTTTGTTAGTTTCACTGTGTCTCTCTTTTTGTTTCTGTTTCAATGAC  
TTGTCCATTAATGAGTGAGGTGCGGAAGTATCCCACACTATTATTGTGTGAGGTTTAGT  
GTGTGCTTTTTTAGCTTTAGTGACATTTCTTTTAAAAATGTAGGTGTCTTGCATTT  
GGGGCATAGATGTTT CAGAATTGAGACTTACTCTTGGTGGATCTTTCCTTTGATGAAT  
ATATGAAGTGTCTTTCGCCATCTCGTTTGATCAGTTTTGGTTGAAAGTCTATTTTAT  
TGAATATTAGAATGGC

>Olf466p DBA/2J

TGGTTCAGTGCTTTTTGTTAGTTTCACTGTGTCTCTCTTTTTGTTTCTGTTTCAATGAC  
TTGTCCATTAATGAGTGAGGTGCGGAAGTATCCCACACTATTATTGTGTGAGGTTTAGT  
GTGTGCTTTTTTAGCTTTAGTGACATTTCTTTTAAAAATGTAGGTGTCTTGCATTT  
GGGGCATAGATGTTT CAGAATTGAGACTTACTCTTGGTGGATCTTTCCTTTGATGAAT  
ATATGAAGTGTCTTTCGCCATCTCGTTTGATCAGTTTTGGTTGAAAGTCTATTTTAT  
TGAATATTAGAATGGC

>Olf466p FVB/NJ

TGGTTCAGTGCTTTTTGTTAGTTTCACTGTGTCTCTCTTTTTGTTTCTGTTTCAATGAC  
TTGTCCATTAATGAGTGAGGTGCGGAAGTATCCCACACTATTATTGTGTGAGGTTTAGT  
GTGTGCTTTTTTAGCTTTAGTGACATTTCTTTTAAAAATGTAGGTGTCTTGCATTT  
GGGGCATAGATGTTT CAGAATTGAGACTTACTCTTGGTGGATCTTTCCTTTGATGAAT  
ATATGAAGTGTCTTTCGCCATCTCGTTTGATCAGTTTTGGTTGAAAGTCTATTTTAT  
TGAATATTAGAATGGC

>Olf466p I/LnJ

TGGTTCAGTGCTTTTTGTTAGTTTCACTGTGTCTCTCTTTTTGTTTCTGTTTCAATGAC  
TTGTCCATTAATGAGTGAGGTGCGGAAGTATCCCACACTATTATTGTGTGAGGTTTAGT  
GTGTGCTTTTTTAGCTTTAGTGACATTTCTTTTAAAAATGTAGGTGTCTTGCATTT  
GGGGCATAGATGTTT CAGAATTGAGACTTACTCTTGGTGGATCTTTCCTTTGATGAAT  
ATATGAAGTGTCTTTCGCCATCTCGTTTGATCAGTTTTGGTTGAAAGTCTATTTTAT  
TGAATATTAGAATGGC

>Olf466p KK/HiJ

TGGTTCAGTGCTTTTTGTTAGTTTCACTGTGTCTCTCTTTTTGTTTCTGTTTCAATGAC  
TTGTCCATTAATGAGTGAGGTGCGGAAGTATCCCACACTATTATTGTGTGAGGTTTAGT  
GTGTGCTTTTTTAGCTTTAGTGACATTTCTTTTAAAAATGTAGGTGTCTTGCATTT  
GGGGCATAGATGTTT CAGAATTGAGACTTACTCTTGGTGGATCTTTCCTTTGATGAAT  
ATATGAAGTGTCTTTCGCCATCTCGTTTGATCAGTTTTGGTTGAAAGTCTATTTTAT  
TGAATATTAGAATGGC

>Olf466p LEWES/EiJ

TGGTTCAGTGCTTTTTGTTAGTTTCACTGTGTCTCTCTTTTTGTTTCTGTTTCAATGAC  
TTGTCCATTAATGAGTGAGGTGCGGAAGTATCCCACACTATTATTGTGTGAGGTTTAGT  
GTGTGCTTTTTTAGCTTTAGTGACATTTCTTTTAAAAATGTAGGTGTCTTGCATTT

GGGGCATAGATGTTTCAGAATTGAGACTTACTCTTGGTGGATCTTTCCTTTGATGAAT  
ATATGAAGTGTCTTCGCCATCTCGTTTGATCAGTTTTGGTTGAAAGTCTATTTTAT  
TGAATATTAGAATGGC

>Olf466p LP/J

TGGTTCAGTGCCTTTGTTAGTTTCACTGTGTCTCTCTTTTGTCTGTTTCAATGAC  
TTGTCCATTAATGAGTGAGGTGCGGAAGTATCCCACCTATTATTGTGTGAGGTTTAGT  
GTGTGCTTTTTTAGCTTTAGTGACATTTCTTTTAAAAATGTAGGTGTCTTGCATTT  
GGGGCATAGATGTTTCAGAATTGAGACTTACTCTTGGTGGATCTTTCCTTTGATGAAT  
ATATGAAGTGTCTTCGCCATCTCGTTTGATCAGTTTTGGTTGAAAGTCTATTTTAT  
TGAATATTAGAATGGC

>Olf466p MOLF/EiJ

TGGTTCAGTGCCTTTGTTAGTTTCACTGTGTCTCTCTTTTGTCTGTTTCAATGAC  
TTGTCCATTAATGAGTGAGGTGCTGAAGTATCCCACCTATTATTGTGTGAGGTTTAGT  
GTGTGCTTTTTTAGCTTTAGTGACATTTCTTTTAAAAATGTAGGTGTCTTGCATTT  
GGGGCATAGATGTTTCAGAATTGAGACTTACTCTTGGTGGATCTTTCCTTTGATGAAT  
ATATGAAGTGTCTTCGCCATCTCATTGATAAGTTTTGGTTGAAAGTCTATTTTAT  
TGAATATTAGAATGGC

>Olf466p NOD/ShiLtJ

TGGTTCAGTGCCTTTGTTAGTTTCACTGTGTCTCTCTTTTGTCTGTTTCAATGAC  
TTGTCCATTAATGAGTGAGGTGCGGAAGTATCCCACCTATTATTGTGTGAGGTTTAGT  
GTGTGCTTTTTTAGCTTTAGTGACATTTCTTTTAAAAATGTAGGTGTCTTGCATTT  
GGGGCATAGATGTTTCAGAATTGAGACTTACTCTTGGTGGATCTTTCCTTTGATGAAT  
ATATGAAGTGTCTTCGCCATCTCGTTTGATCAGTTTTGGTTGAAAGTCTATTTTAT  
TGAATATTAGAATGGC

>Olf466p NZB/B1NJ

TGGTTCAGTGCCTTTGTTAGTTTCACTGTGTCTCTCTTTTGTCTGTTTCAATGAC  
TTGTCCATTAATGAGTGAGGTGCGGAAGTATCCCACCTATTATTGTGTGAGGTTTAGT  
GTGTGCTTTTTTAGCTTTAGTGACATTTCTTTTAAAAATGTAGGTGTCTTGCATTT  
GGGGCATAGATGTTTCAGAATTGAGACTTACTCTTGGTGGATCTTTCCTTTGATGAAT  
ATATGAAGTGTCTTCGCCATCTCGTTTGATCAGTTTTGGTTGAAAGTCTATTTTAT  
TGAATATTAGAATGGC

>Olf466p NZO/H1LtJ

TGGTTCAGTGCCTTTGTTAGTTTCACTGTGTCTCTCTTTTGTCTGTTTCAATGAC  
TTGTCCATTAATGAGTGAGGTGCGGAAGTATCCCACCTATTATTGTGTGAGGTTTAGT  
GTGTGCTTTTTTAGCTTTAGTGACATTTCTTTTAAAAATGTAGGTGTCTTGCATTT  
GGGGCATAGATGTTTCAGAATTGAGACTTACTCTTGGTGGATCTTTCCTTTGATGAAT  
ATATGAAGTGTCTTCGCCATCTCGTTTGATCAGTTTTGGTTGAAAGTCTATTTTAT  
TGAATATTAGAATGGC

>Olf466p NZW/LacJ

TGGTTCAGTGCCTTTGTTAGTTTCACTGTGTCTCTCTTTTGTCTGTTTCAATGAC  
TTGTCCATTAATGAGTGAGGTGCGGAAGTATCCCACCTATTATTGTGTGAGGTTTAGT  
GTGTGCTTTTTTAGCTTTAGTGACATTTCTTTTAAAAATGTAGGTGTCTTGCATTT  
GGGGCATAGATGTTTCAGAATTGAGACTTACTCTTGGTGGATCTTTCCTTTGATGAAT  
ATATGAAGTGTCTTCGCCATCTCGTTTGATCAGTTTTGGTTGAAAGTCTATTTTAT  
TGAATATTAGAATGGC

>Olf466p PWK/PhJ

TGGTTCAGTGCCTTTGTTAGTTTCACTGTGTCTCTCTTTTGTCTGTTTCAATGAC  
TTGTCCATTAATGAGTGAGGTGCTGAAGTATCCCACCTATTATTGTGTGAGGTTTAGT  
GTGTGCTTTTTTAGCTTTAGTGACATTTCTTTTAAAAATGTAGGTGTCTTGCATTT  
GGGGCATAGATGTTTCAGAATTGAGACTTACTCTTGGTGGATCTTTCCTTTGATGAAT  
ATATGAAGTGTCTTCGCCATCTCGTTTGATAAGTTTTGGTTGAAAGTCTATTTTAT

TGAATATTAGAATGGC

>Olf466p RF/J

TGGTTCAGTGCTTTTGTAGTTTCACTGTGTCTCTCTTTTGTCTGTTTCAATGAC  
TTGTCCATTAATGAGTGAGGTGCGGAAGTATCCCACACTATTATTGTGTGAGGTTTAGT  
GTGTGCTTTTTTAGCTTTAGTGACATTTCTTTTAAAAATGTAGGTGTCTTGCATTT  
GGGGCATAGATGTTTCAAGATTGAGACTTACTCTTGGTGGATCTTTCCTTTGATGAAT  
ATATGAAGTGTCTTTCGCCATCTCGTTTGATCAGTTTTGGTTGAAAGTCTATTTTAT  
TGAATATTAGAATGGC

>Olf466p SEA/GnJ

TGGTTCAGTGCTTTTGTAGTTTCACTGTGTCTCTCTTTTGTCTGTTTCAATGAC  
TTGTCCATTAATGAGTGAGGTGCGGAAGTATCCCACACTATTATTGTGTGAGGTTTAGT  
GTGTGCTTTTTTAGCTTTAGTGACATTTCTTTTAAAAATGTAGGTGTCTTGCATTT  
GGGGCATAGATGTTTCAAGATTGAGACTTACTCTTGGTGGATCTTTCCTTTGATGAAT  
ATATGAAGTGTCTTTCGCCATCTCGTTTGATCAGTTTTGGTTGAAAGTCTATTTTAT  
TGAATATTAGAATGGC

>Olf466p SPRET/EiJ

TGGTTCAGTGCTTTTGTAGTTTCACTGTGTCTCTCTTTTGTCTGTTTCAATGAC  
TTGTCCATTAATGAGTGAGGTGCTGAAGTATCCCACACTATTATTGTGTGAGGTTTAGT  
GTGTGCTTTTTTAGCTTTAGTGACATTTCTTTTAAAAATGTAGGTGTCTTGCATTT  
GGGGCATAGATGTTTCAAGATTGAGACTTACTCTTGGTGGATCTTTCCTTTGATGAAT  
ATATGAAGTGTCTTTCGCCATCTCGTTTGATAAGTTTTGGTTGAAAGTCTATTTTAT  
TGAATATTAGAATGGC

>Olf466p ST/bJ

TGGTTCAGTGCTTTTGTAGTTTCACTGTGTCTCTCTTTTGTCTGTTTCAATGAC  
TTGTCCATTAATGAGTGAGGTGCGGAAGTATCCCACACTATTATTGTGTGAGGTTTAGT  
GTGTGCTTTTTTAGCTTTAGTGACATTTCTTTTAAAAATGTAGGTGTCTTGCATTT  
GGGGCATAGATGTTTCAAGATTGAGACTTACTCTTGGTGGATCTTTCCTTTGATGAAT  
ATATGAAGTGTCTTTCGCCATCTCGTTTGATCAGTTTTGGTTGAAAGTCTATTTTAT  
TGAATATTAGAATGGC

>Olf466p WSB/EiJ

TGGTTCAGTGCTTTTGTAGTTTCACTGTGTCTCTCTTTTGTCTGTTTCAATGAC  
TTGTCCATTAATGAGTGAGGTGCGGAAGTATCCCACACTATTATTGTGTGAGGTTTAGT  
GTGTGCTTTTTTAGCTTTAGTGACATTTCTTTTAAAAATGTAGGTGTCTTGCATTT  
GGGGCATAGATGTTTCAAGATTGAGACTTACTCTTGGTGGATCTTTCCTTTGATGAAT  
ATATGAAGTGTCTTTCGCCATCTCGTTTGATCAGTTTTGGTTGAAAGTCTATTTTAT  
TGAATATTAGAATGGC

>Olf466p ZLENDE/EiJ

TGGTTCAGTGCTTTTGTAGTTTCACTGTGTCTCTCTTTTGTCTGTTTCAATGAC  
TTGTCCATTAATGAGTGAGGTGCGGAAGTATCCCACACTATTATTGTGTGAGGTTTAGT  
GTGTGCTTTTTTAGCTTTAGTGACATTTCTTTTAAAAATGTAGGTGTCTTGCATTT  
GGGGCATAGATGTTTCAAGATTGAGACTTACTCTTGGTGGATCTTTCCTTTGATGAAT  
ATATGAAGTGTCTTTCGCCATCTCGTTTGATCAGTTTTGGTTGAAAGTCTATTTTAT  
TGAATATTAGAATGGC

>Olf1402 C57BL/6J

CACCAGGGAGGAGGATAGTCAGGCTTTCAGGCTTCAGCCACAGCAATCCCAACAAT  
ACATTTAGGACTGCAATTTACTAACAATGTCCCAAAGAGATAGGGAGCTGTTCTC  
ATTGCATTTTGGGAAAAGATGATTTCTATGACCTTAATAAATACACAAGAGAGTTAA  
TTGTTCTTCATTTCTACAGCTTCTGTTTTGGCTGTTGCCTTTGATTTGTATTTGTGT  
GCTAAGGCGTTTCAGACAGCTGCTGAGAGAGAGATTACTTAGGCTACTCTCTAAAGG  
TTAGTCCATGAACCTT

>Olfr1402 Wild\_consensus

CACCAGGGAGGAGGATAGTCAGGCTTTCAGGCTTCAGCCACAGCAATTCCCAACAAT  
ACATTTAGGACTGCAATTTACTAACAATGTCCCAAAGAGATAGGGAGCTGTTCTC  
ATTGCATTTTGGGAAAAGATGATTTCTATGACCTTAATAAATACACAAGAGAGTTAA  
TTGTTCTTCATTTCTACAGCTTCTGTTTTGGCTGTTGCCTTTGATTTGTATTTGTGT  
GCTAAGGCGTTTCAGACAGCTGCTGAGAGAGAGATTACTTAGGCTACTCTCTAAAGG  
TCAGTCCATGAACCTT

>Olfr1402 France

CACCAGGGAGGAGGATAGTCAGGCTTTCAGGCTTCAGCCACAGCAATTCCCAACAAT  
ACATTTAGGACTGCAATTTACTAACAATGTCCCAAAGAGATAGGGAGCTGTTCTC  
ATTGCATTTTGGGAAAAGATGATTTCTATGACCTTAATAAATACACAAGAGAGTTAA  
TTGTTCTTCATTTCTACAGCTTCTGTTTTGGCTGTTGCCTTTGATTTGTATTTGTGT  
GCTAAGGCGTTTCAGACAGCTGCTGAGAGAGAGATTACTTAGGCTACTCTCTAAAGG  
TCAGTCCATGAACCTT

>Olfr1402 Germany

CACCAGGGAGGAGGATAGTCAGGCTTTCAGGCTTCAGCCACAGCAATTCCCAACAAT  
ACATTTAGGACTGCAATTTACTAACAATGTCCCAAAGAGATAGGGAGCTGTTCTC  
ATTGCATTTTGGGAAAAGATGATTTCTATGACCTTAATAAATACACAAGAGAGTTAA  
TTGTTCTTCATTTCTACAGCTTCTGTTTTGGCTGTTGCCTTTGATTTGTATTTGTGT  
GCTAAGGCGTTTCAGACAGCTGCTGAGAGAGAGATTACTTAGGCTACTCTCTAAAGG  
TCAGTCCATGAACCTT

>Olfr1402 Iran

CACCAGGGAGGAGGATAGTCAGGCTTTCAGGCTTCAGCCACAGCAATTCCCAACAAT  
ACATTTAGGACTGCAATTTACTAACAATGTCCCAAAGAGATAGGGAGCTGTTCTC  
ATTGCATTTTGGGAAAAGATGATTTCTATGACCTTAATAAATACACAAGAGAGTTAA  
TTGTTCTTCATTTCTACAGCTTCTGTTTTGGCTGTTGCCTTTGATTTGTATTTGTGT  
GCTAAGGCGTTTCAGACAGCTGCTGAGAGAGAGATTACTTAGGCTACTCTCTAAAGG  
TCAGTCCATGAACCTT

>Olfr1402 129P2/OlaHsd

CACCAGGGAGGAGGATAGTCAGGCTTTCAGGCTTCAGCCACAGCAATTCCCAACAAT  
ACATTTAGGACTGCAATTTACTAACAATGTCCCAAAGAGATAGGGAGCTGTTCTC  
ATTGCATTTTGGGAAAAGATGATTTCTATGACCTTAATAAATACACAAGAGAGTTAA  
TTGTTCTTCATTTCTACAGCTTCTGTTTTGGCTGTTGCCTTTGATTTGTATTTGTGT  
GCTAAGGCGTTTCAGACAGCTGCTGAGAGAGAGATTACTTAGGCTACTCTCTAAAGG  
TTAGTCCATGAACCTT

>Olfr1402 129S1/SvImJ

CACCAGGGAGGAGGATAGTCAGGCTTTCAGGCTTCAGCCACAGCAATTCCCAACAAT  
ACATTTAGGACTGCAATTTACTAACAATGTCCCAAAGAGATAGGGAGCTGTTCTC  
ATTGCATTTTGGGAAAAGATGATTTCTATGACCTTAATAAATACACAAGAGAGTTAA  
TTGTTCTTCATTTCTACAGCTTCTGTTTTGGCTGTTGCCTTTGATTTGTATTTGTGT  
GCTAAGGCGTTTCAGACAGCTGCTGAGAGAGAGATTACTTAGGCTACTCTCTAAAGG  
TTAGTCCATGAACCTT

>Olfr1402 129S5SvEvBrd

CACCAGGGAGGAGGATAGTCAGGCTTTCAGGCTTCAGCCACAGCAATTCCCAACAAT  
ACATTTAGGACTGCAATTTACTAACAATGTCCCAAAGAGATAGGGAGCTGTTCTC  
ATTGCATTTTGGGAAAAGATGATTTCTATGACCTTAATAAATACACAAGAGAGTTAA  
TTGTTCTTCATTTCTACAGCTTCTGTTTTGGCTGTTGCCTTTGATTTGTATTTGTGT  
GCTAAGGCGTTTCAGACAGCTGCTGAGAGAGAGATTACTTAGGCTACTCTCTAAAGG  
TTAGTCCATGAACCTT

>Olfr1402 A/J

CACCAGGGAGGAGGATAGTCAGGCTTTCAGGCTTCAGCCACAGCAATTCCCAACAAT

ACATTTAGGACTGCAATTTACTAACAAATGTCCCAAAGAGATAGGGAGCTGTTCTC  
ATTGCATTTTGGGAAAAGATGATTTCTATGACCTTAATAAATACACAAGAGAGTTAA  
TTGTTCTTCATTTCTACAGCTTCTGTTTTGGCTGTTGCCTTTGATTTGTATTTGTGT  
GCTAAGGCGTTTCAGACAGCTGCTGAGAGAGAGATTACTTAGGCTACTCTCTAAAGG  
TTAGTCCATGAACCTT

>Olf1402 AKR/J

CACCAGGGAGGAGGATAGTCAGGCTTTCAGGCTTCAGCCACAGCAATTCCCAACAAT  
ACATTTAGGACTGCAATTTACTAACAAATGTCCCAAAGAGATAGGGAGCTGTTCTC  
ATTGCATTTTGGGAAAAGATGATTTCTATGACCTTAATAAATACACAAGAGAGTTAA  
TTGTTCTTCATTTCTACAGCTTCTGTTTTGGCTGTTGCCTTTGATTTGTATTTGTGT  
GCTAAGGCGTTTCAGACAGCTGCTGAGAGAGAGATTACTTAGGCTACTCTCTAAAGG  
TTAGTCCATGAACCTT

>Olf1402 BALB/cJ

CACCAGGGAGGAGGATAGTCAGGCTTTCAGGCTTCAGCCACAGCAATTCCCAACAAT  
ACATTTAGGACTGCAATTTACTAACAAATGTCCCAAAGAGATAGGGAGCTGTTCTC  
ATTGCATTTTGGGAAAAGATGATTTCTATGACCTTAATAAATACACAAGAGAGTTAA  
TTGTTCTTCATTTCTACAGCTTCTGTTTTGGCTGTTGCCTTTGATTTGTATTTGTGT  
GCTAAGGCGTTTCAGACAGCTGCTGAGAGAGAGATTACTTAGGCTACTCTCTAAAGG  
TTAGTCCATGAACCTT

>Olf1402 BTBR/T<sub>+</sub>Itpr3tf/J

CACCAGGGAGGAGGATAGTCAGGCTTTCAGGCTTCAGCCACAGCAATTCCCAACAAT  
ACATTTAGGACTGCAATTTACTAACAAATGTCCCAAAGAGATAGGGAGCTGTTCTC  
ATTGCATTTTGGGAAAAGATGATTTCTATGACCTTAATAAATACACAAGAGAGTTAA  
TTGTTCTTCATTTCTACAGCTTCTGTTTTGGCTGTTGCCTTTGATTTGTATTTGTGT  
GCTAAGGCGTTTCAGACAGCTGCTGAGAGAGAGATTACTTAGGCTACTCTCTAAAGG  
TTAGTCCATGAACCTT

>Olf1402 BUB/BnJ

CACCAGGGAGGAGGATAGTCAGGCTTTCAGGCTTCAGCCACAGCAATTCCCAACAAT  
ACATTTAGGACTGCAATTTACTAACAAATGTCCCAAAGAGATAGGGAGCTGTTCTC  
ATTGCATTTTGGGAAAAGATGATTTCTATGACCTTAATAAATACACAAGAGAGTTAA  
TTGTTCTTCATTTCTACAGCTTCTGTTTTGGCTGTTGCCTTTGATTTGTATTTGTGT  
GCTAAGGCGTTTCAGACAGCTGCTGAGAGAGAGATTACTTAGGCTACTCTCTAAAGG  
TTAGTCCATGAACCTT

>Olf1402 C3H/HeH

CACCAGGGAGGAGGATAGTCAGGCTTTCAGGCTTCAGCCACAGCAATTCCCAACAAT  
ACATTTAGGACTGCAATTTACTAACAAATGTCCCAAAGAGATAGGGAGCTGTTCTC  
ATTGCATTTTGGGAAAAGATGATTTCTATGACCTTAATAAATACACAAGAGAGTTAA  
TTGTTCTTCATTTCTACAGCTTCTGTTTTGGCTGTTGCCTTTGATTTGTATTTGTGT  
GCTAAGGCGTTTCAGACAGCTGCTGAGAGAGAGATTACTTAGGCTACTCTCTAAAGG  
TTAGTCCATGAACCTT

>Olf1402 C3H/HeJ

CACCAGGGAGGAGGATAGTCAGGCTTTCAGGCTTCAGCCACAGCAATTCCCAACAAT  
ACATTTAGGACTGCAATTTACTAACAAATGTCCCAAAGAGATAGGGAGCTGTTCTC  
ATTGCATTTTGGGAAAAGATGATTTCTATGACCTTAATAAATACACAAGAGAGTTAA  
TTGTTCTTCATTTCTACAGCTTCTGTTTTGGCTGTTGCCTTTGATTTGTATTTGTGT  
GCTAAGGCGTTTCAGACAGCTGCTGAGAGAGAGATTACTTAGGCTACTCTCTAAAGG  
TTAGTCCATGAACCTT

>Olf1402 C57BL/10J

CACCAGGGAGGAGGATAGTCAGGCTTTCAGGCTTCAGCCACAGCAATTCCCAACAAT  
ACATTTAGGACTGCAATTTACTAACAAATGTCCCAAAGAGATAGGGAGCTGTTCTC  
ATTGCATTTTGGGAAAAGATGATTTCTATGACCTTAATAAATACACAAGAGAGTTAA

TTGTTCTTCATTTCTACAGCTTCTGTTTTGGCTGTTGCCTTTGATTTGTATTTGTGT  
GCTAAGGCGTTTCAGACAGCTGCTGAGAGAGAGATTACTTAGGCTACTCTCTAAAGG  
TTAGTCCATGAACCTT

>Olf1402 C57BL/6NJ

CACCAGGGAGGAGGATAGTCAGGCTTTCAGGCTTCAGCCACAGCAATTCCCAACAAT  
ACATTTAGGACTGCAATTTACTAACAAATGTCCCAAAGAGATAGGGAGCTGTTCTC  
ATTGCATTTTGGGAAAAGATGATTTCTATGACCTTAATAAATACACAAGAGAGTTAA  
TTGTTCTTCATTTCTACAGCTTCTGTTTTGGCTGTTGCCTTTGATTTGTATTTGTGT  
GCTAAGGCGTTTCAGACAGCTGCTGAGAGAGAGATTACTTAGGCTACTCTCTAAAGG  
TTAGTCCATGAACCTT

>Olf1402 C57BR/cdJ

CACCAGGGAGGAGGATAGTCAGGCTTTCAGGCTTCAGCCACAGCAATTCCCAACAAT  
ACATTTAGGACTGCAATTTACTAACAAATGTCCCAAAGAGATAGGGAGCTGTTCTC  
ATTGCATTTTGGGAAAAGATGATTTCTATGACCTTAATAAATACACAAGAGAGTTAA  
TTGTTCTTCATTTCTACAGCTTCTGTTTTGGCTGTTGCCTTTGATTTGTATTTGTGT  
GCTAAGGCGTTTCAGACAGCTGCTGAGAGAGAGATTACTTAGGCTACTCTCTAAAGG  
TTAGTCCATGAACCTT

>Olf1402 C57L/J

CACCAGGGAGGAGGATAGTCAGGCTTTCAGGCTTCAGCCACAGCAATTCCCAACAAT  
ACATTTAGGACTGCAATTTACTAACAAATGTCCCAAAGAGATAGGGAGCTGTTCTC  
ATTGCATTTTGGGAAAAGATGATTTCTATGACCTTAATAAATACACAAGAGAGTTAA  
TTGTTCTTCATTTCTACAGCTTCTGTTTTGGCTGTTGCCTTTGATTTGTATTTGTGT  
GCTAAGGCGTTTCAGACAGCTGCTGAGAGAGAGATTACTTAGGCTACTCTCTAAAGG  
TTAGTCCATGAACCTT

>Olf1402 C58/J

CACCAGGGAGGAGGATAGTCAGGCTTTCAGGCTTCAGCCACAGCAATTCCCAACAAT  
ACATTTAGGACTGCAATTTACTAACAAATGTCCCAAAGAGATAGGGAGCTGTTCTC  
ATTGCATTTTGGGAAAAGATGATTTCTATGACCTTAATAAATACACAAGAGAGTTAA  
TTGTTCTTCATTTCTACAGCTTCTGTTTTGGCTGTTGCCTTTGATTTGTATTTGTGT  
GCTAAGGCGTTTCAGACAGCTGCTGAGAGAGAGATTACTTAGGCTACTCTCTAAAGG  
TTAGTCCATGAACCTT

>Olf1402 CAST/EiJ

CACCAGGGAGGAGGATAGTCAGGCTTTCAGGCTTCAGCCACAGCAATTCTCAACAAT  
ACATTTAGGACTGCAATTTACTAACAAATGTCCCAAAGAGATAGGGAGCTGTTCTC  
ATTGCATTTTGGGAAAACATGATTTCTATGACCTTAATAAATACCAAGAGAGTTAA  
TTGTTCTTCATTTCTACAGCTTCTGTTTTGGCTGTTGCCTTTGATTTGTATTTGTGT  
GCTAAGGCATTTTCAGACAGCTGCTGAGAGAGAGATTACTTAGGCTACTCTCTAAAGG  
TCAGTCCATGAACCTT

>Olf1402 CBA/J

CACCAGGGAGGAGGATAGTCAGGCTTTCAGGCTTCAGCCACAGCAATTCCCAACAAT  
ACATTTAGGACTGCAATTTACTAACAAATGTCCCAAAGAGATAGGGAGCTGTTCTC  
ATTGCATTTTGGGAAAAGATGATTTCTATGACCTTAATAAATACACAAGAGAGTTAA  
TTGTTCTTCATTTCTACAGCTTCTGTTTTGGCTGTTGCCTTTGATTTGTATTTGTGT  
GCTAAGGCGTTTCAGACAGCTGCTGAGAGAGAGATTACTTAGGCTACTCTCTAAAGG  
TTAGTCCATGAACCTT

>Olf1402 DBA/1J

CACCAGGGAGGAGGATAGTCAGGCTTTCAGGCTTCAGCCACAGCAATTCCCAACAAT  
ACATTTAGGACTGCAATTTACTAACAAATGTCCCAAAGAGATAGGGAGCTGTTCTC  
ATTGCATTTTGGGAAAAGATGATTTCTATGACCTTAATAAATACACAAGAGAGTTAA  
TTGTTCTTCATTTCTACAGCTTCTGTTTTGGCTGTTGCCTTTGATTTGTATTTGTGT  
GCTAAGGCGTTTCAGACAGCTGCTGAGAGAGAGATTACTTAGGCTACTCTCTAAAGG

TTAGTCCATGAACCTT

>Olf1402 DBA/2J

CACCAGGGAGGAGGATAGTCAGGCTTTCAGGCTTCAGCCACAGCAATTCCCAACAAT  
ACATTTAGGACTGCAATTTACTAACAAATGTCCCAAAGAGATAGGGAGCTGTTCTC  
ATTGCATTTTGGGAAAAGATGATTTCTATGACCTTAATAAATACACAAGAGAGTTAA  
TTGTTCTTCATTTCTACAGCTTCTGTTTTGGCTGTTGCCTTTGATTTGTATTTGTGT  
GCTAAGGCGTTTCAGACAGCTGCTGAGAGAGAGATTACTTAGGCTACTCTCTAAAGG  
TTAGTCCATGAACCTT

>Olf1402 FVB/NJ

CACCAGGGAGGAGGATAGTCAGGCTTTCAGGCTTCAGCCACAGCAATTCCCAACAAT  
ACATTTAGGACTGCAATTTACTAACAAATGTCCCAAAGAGATAGGGAGCTGTTCTC  
ATTGCATTTTGGGAAAAGATGATTTCTATGACCTTAATAAATACACAAGAGAGTTAA  
TTGTTCTTCATTTCTACAGCTTCTGTTTTGGCTGTTGCCTTTGATTTGTATTTGTGT  
GCTAAGGCGTTTCAGACAGCTGCTGAGAGAGAGATTACTTAGGCTACTCTCTAAAGG  
TTAGTCCATGAACCTT

>Olf1402 I/LnJ

CACCAGGGAGGAGGATAGTCAGGCTTTCAGGCTTCAGCCACAGCAATTCCCAACAAT  
ACATTTAGGACTGCAATTTACTAACAAATGTCCCAAAGAGATAGGGAGCTGTTCTC  
ATTGCATTTTGGGAAAAGATGATTTCTATGACCTTAATAAATACACAAGAGAGTTAA  
TTGTTCTTCATTTCTACAGCTTCTGTTTTGGCTGTTGCCTTTGATTTGTATTTGTGT  
GCTAAGGCGTTTCAGACAGCTGCTGAGAGAGAGATTACTTAGGCTACTCTCTAAAGG  
TTAGTCCATGAACCTT

>Olf1402 KK/HiJ

CACCAGGGAGGAGGATAGTCAGGCTTTCAGGCTTCAGCCACAGCAATTCTCAACAAT  
ACATTTAGGACTGCAATTTACTAACAAATGTCCCAAAGAGATAGGGAGCTGTTCTC  
ATTGCATTTTGGGAAAACATGATTTCTATGACCTTAATAAATACACAAGAGAGTTAA  
TTGTTCTTCATTTCTACAGCTTCTGTTTTGGCTGTTGCCTTTGATTTGTATTTGTGT  
GCTAAGGCATTTTCAGACAGCTGCTGAGAGAGAGATTACTTAGGCTACTCTCTAAAGG  
TCAGTCCATGAACCTT

>Olf1402 LEWES/EiJ

CACCAGGGAGGAGGATAGTCAGGCTTTCAGGCTTCAGCCACAGCAATTCCCAACAAT  
ACATTTAGGACTGCAATTTACTAACAAATGTCCCAAAGAGATAGGGAGCTGTTCTC  
ATTGCATTTTGGGAAAAGATGATTTCTATGACCTTAATAAATACACAAGAGAGTTAA  
TTGTTCTTCATTTCTACAGCTTCTGTTTTGGCTGTTGCCTTTGATTTGTATTTGTGT  
GCTAAGGCGTTTCAGACAGCTGCTGAGAGAGAGATTACTTAGGCTACTCTCTAAAGG  
TCAGTCCATGAACCTT

>Olf1402 LP/J

CACCAGGGAGGAGGATAGTCAGGCTTTCAGGCTTCAGCCACAGCAATTCCCAACAAT  
ACATTTAGGACTGCAATTTACTAACAAATGTCCCAAAGAGATAGGGAGCTGTTCTC  
ATTGCATTTTGGGAAAAGATGATTTCTATGACCTTAATAAATACACAAGAGAGTTAA  
TTGTTCTTCATTTCTACAGCTTCTGTTTTGGCTGTTGCCTTTGATTTGTATTTGTGT  
GCTAAGGCGTTTCAGACAGCTGCTGAGAGAGAGATTACTTAGGCTACTCTCTAAAGG  
TTAGTCCATGAACCTT

>Olf1402 MOLF/EiJ

CACCAGGGAGGAGGATAGTCAGGCTTTCAGGCTTCAGCCACAGCAATTCTCAACAAT  
ACATTTAGGACTGCAATTTACTAACAAATGTCCCAAAGAGATAGGGAGCTGTTCTC  
ATTGCATTTTGGGAAAACATGATTTCTATGACCTTAATAAATACACAAGAGAGTTAA  
TTGTTCTTCATTTCTACAGCTTCTGTTTTGGCTGTTGCCTTTGATTTGTATTTGTGT  
GCTAAGGCATTTTCAGACAGCTGCTGAGAGAGAGATTACTTAGGCTACTCTCTAAAGG  
TCAGTCCATGAACCTT

>Olf1402 NOD/ShiLtJ

CACCAGGGAGGAGGATAGTCAGGCTTTCAGGCTTCAGCCACAGCAATTCCCAACAAT  
ACATTTAGGACTGCAATTTACTAACAAATGTCCCAAAGAGATAGGGAGCTGTTCTC  
ATTGCATTTTGGGAAAAGATGATTTCTATGACCTTAATAAATACACAAGAGAGTTAA  
TTGTTCTTCATTTCTACAGCTTCTGTTTTGGCTGTTGCCTTTGATTTGTATTTGTGT  
GCTAAGGCGTTTCAGACAGCTGCTGAGAGAGAGATTACTTAGGCTACTCTCTAAAGG  
TCAGTCCATGAACCTT

>Olf1402 NZB/B1NJ

CACCAGGGAGGAGGATAGTCAGGCTTTCAGGCTTCAGCCACAGCAATTCCCAACAAT  
ACATTTAGGACTGCAATTTACTAACAAATGTCCCAAAGAGATAGGGAGCTGTTCTC  
ATTGCATTTTGGGAAAAGATGATTTCTATGACCTTAATAAATACACAAGAGAGTTAA  
TTGTTCTTCATTTCTACAGCTTCTGTTTTGGCTGTTGCCTTTGATTTGTATTTGTGT  
GCTAAGGCGTTTCAGACAGCTGCTGAGAGAGAGATTACTTAGGCTACTCTCTAAAGG  
TCAGTCCATGAACCTT

>Olf1402 NZO/H1LtJ

CACCAGGGAGGAGGATAGTCAGGCTTTCAGGCTTCAGCCACAGCAATTCCCAACAAT  
ACATTTAGGACTGCAATTTACTAACAAATGTCCCAAAGAGATAGGGAGCTGTTCTC  
ATTGCATTTTGGGAAAAGATGATTTCTATGACCTTAATAAATACACAAGAGAGTTAA  
TTGTTCTTCATTTCTACAGCTTCTGTTTTGGCTGTTGCCTTTGATTTGTATTTGTGT  
GCTAAGGCGTTTCAGACAGCTGCTGAGAGAGAGATTACTTAGGCTACTCTCTAAAGG  
TCAGTCCATGAACCTT

>Olf1402 NZW/LacJ

CACCAGGGAGGAGGATAGTCAGGCTTTCAGGCTTCAGCCACAGCAATTCCCAACAAT  
ACATTTAGGACTGCAATTTACTAACAAATGTCCCAAAGAGATAGGGAGCTGTTCTC  
ATTGCATTTTGGGAAAAGATGATTTCTATGACCTTAATAAATACACAAGAGAGTTAA  
TTGTTCTTCATTTCTACAGCTTCTGTTTTGGCTGTTGCCTTTGATTTGTATTTGTGT  
GCTAAGGCGTTTCAGACAGCTGCTGAGAGAGAGATTACTTAGGCTACTCTCTAAAGG  
TCAGTCCATGAACCTT

>Olf1402 PWK/PhJ

CACCAGGGAGGAGGATAGTCAGGCTTTCAGGCTTCAGCCACAGCAATTCTCAACAAT  
ACATTTAGGACTGCAATTTACTAACAAATGTCCCAAAGAGATAGGGAGCTGTTCTC  
ATTGCATTTTGGGAAAACATGATTTCTATGACCTTAATAAATACACAAGAGAGTTAA  
TTGTTCTTCATTTCTACAGCTTCTGTTTTGGCTGTTGCCTTTGATTTGTATTTGTGT  
GCTAAGGCATTTTCAGACAGCTGCTGAGAGAGAGATTACTTAGGCTACTCTCTAAAGG  
TCAGTCCATGAACCTT

>Olf1402 RF/J

CACCAGGGAGGAGGATAGTCAGGCTTTCAGGCTTCAGCCACAGCAATTCCCAACAAT  
ACATTTAGGACTGCAATTTACTAACAAATGTCCCAAAGAGATAGGGAGCTGTTCTC  
ATTGCATTTTGGGAAAAGATGATTTCTATGACCTTAATAAATACACAAGAGAGTTAA  
TTGTTCTTCATTTCTACAGCTTCTGTTTTGGCTGTTGCCTTTGATTTGTATTTGTGT  
GCTAAGGCGTTTCAGACAGCTGCTGAGAGAGAGATTACTTAGGCTACTCTCTAAAGG  
TTAGTCCATGAACCTT

>Olf1402 SEA/GnJ

CACCAGGGAGGAGGATAGTCAGGCTTTCAGGCTTCAGCCACAGCAATTCCCAACAAT  
ACATTTAGGACTGCAATTTACTAACAAATGTCCCAAAGAGATAGGGAGCTGTTCTC  
ATTGCATTTTGGGAAAAGATGATTTCTATGACCTTAATAAATACACAAGAGAGTTAA  
TTGTTCTTCATTTCTACAGCTTCTGTTTTGGCTGTTGCCTTTGATTTGTATTTGTGT  
GCTAAGGCGTTTCAGACAGCTGCTGAGAGAGAGATTACTTAGGCTACTCTCTAAAGG  
TTAGTCCATGAACCTT

>Olf1402 SPRET/EiJ

CACCAGGGAGGAGGATAGTCAGGCTTTCAGGCTTCAGCCACAGCAATTCCCAACAAT  
ACATTTAGGACTGCAATTTACTAATAATGTCCCAAAGAGATAGGGAGCTGTTCTC



ATTGCATTTTGGGAAAAGATGATTTCTATGACCTTAATAAATACCCAAGAGAGTTAA  
TTGTTCTTCATTTCTACAGCTTCTGTTTTGGCTGTTGCCTTTGATTTGTATTTGTGT  
GCTAAGGCATTTTCAGACAGCTGCTGAGAGAGAGATTACTTAGGCTACTCTCTAATGG  
TTAGTCCATGAACCTT

>Olf1402 ST/bJ

CACCAGGGAGGAGGATAGTCAGGCTTTCAGGCTTCAGCCACAGCAATTCCCAACAAT  
ACATTTAGGACTGCAATTTACTAACAATGTCCCAAAGAGATAGGGAGCTGTTCTC  
ATTGCATTTTGGGAAAAGATGATTTCTATGACCTTAATAAATACACAAGAGAGTTAA  
TTGTTCTTCATTTCTACAGCTTCTGTTTTGGCTGTTGCCTTTGATTTGTATTTGTGT  
GCTAAGGCGTTTCAGACAGCTGCTGAGAGAGAGATTACTTAGGCTACTCTCTAAAGG  
TTAGTCCATGAACCTT

>Olf1402 WSB/EiJ

CACCAGGGAGGAGGATAGTCAGGCTTTCAGGCTTCAGCCACAGCAATTCCCAACAAT  
ACATTTAGGACTGCAATTTACTAACAATGTCCCAAAGAGATAGGGAGCTGTTCTC  
ATTGCATTTTGGGAAAAGATGATTTCTATGACCTTAATAAATACACAAGAGAGTTAA  
TTGTTCTTCATTTCTACAGCTTCTGTTTTGGCTGTTGCCTTTGATTTGTATTTGTGT  
GCTAAGGCGTTTCAGACAGCTGCTGAGAGAGAGATTACTTAGGCTACTCTCTAAAGG  
TCAGTCCATGAACCTT

>Olf1402 ZALENDE/EiJ

CACCAGGGAGGAGGATAGTCAGGCTTTCAGGCTTCAGCCACAGCAATTCCCAACAAT  
ACATTTAGGACTGCAATTTACTAACAATGTCCCAAAGAGATAGGGAGCTGTTCTC  
ATTGCATTTTGGGAAAAGATGATTTCTATGACCTTAATAAATACACAAGAGAGTTAA  
TTGTTCTTCATTTCTACAGCTTCTGTTTTGGCTGTTGCCTTTGATTTGTATTTGTGT  
GCTAAGGCGTTTCAGACAGCTGCTGAGAGAGAGATTACTTAGGCTACTCTCTAAAGG  
TCAGTCCATGAACCTT
